# Supplementary material for: Aerobic waste-minimized Pd-catalysed C–H alkenylation in GVL using a tube-in-tube heterogeneous flow reactor
Source: Royal Society of Chemistry journal article supplement (doi:10.1039/d1gc01870a), 2021-01-01
Supplement: d1gc01870a1.pdf [file d1gc01870a1.pdf]

## Electronic Supplementary Information

# Aerobic waste-minimized Pd-catalyzed C–H alkenylation in GVL using a tube-in-tube heterogeneous flow reactor

Francesco Ferlin,<sup>[a]</sup> Ioannis Anastasiou,<sup>[a]</sup> Luigi Carpisassi,<sup>[a]</sup> and Luigi Vaccaro\*<sup>[a]</sup>

<sup>a</sup> *Laboratory of Green S.O.C. – Dipartimento di Chimica, Biologia e Biotecnologie, Università degli Studi di Perugia, Via Elce di Sotto 8, 06123 – Perugia (Italy). E-mail: luigi.vaccaro@unipg.it; Homepage: <http://greensoc.chm.unipg.it/>*

### CONTENTS

|                                                                           |               |
|---------------------------------------------------------------------------|---------------|
| <b>1. General Remarks</b>                                                 | <b>ESI-2</b>  |
| <b>2. General Assembly of the reactor</b>                                 | <b>ESI-3</b>  |
| <b>3. General Procedures</b>                                              | <b>ESI-3</b>  |
| <b>4. E-factor calculations</b>                                           | <b>ESI-4</b>  |
| <b>5. RME and MRP calculation</b>                                         | <b>ESI-5</b>  |
| <b>6. Substrates scope using 20 mol% of <i>p</i>-benzoquinone in Flow</b> | <b>ESI-6</b>  |
| <b>7. Characterization data of products</b>                               | <b>ESI-7</b>  |
| <b>8. NMR spectra</b>                                                     | <b>ESI-13</b> |

## 1. General Remarks

All chemicals were used without any further purification unless otherwise noted. GLC analyses were performed by using Agilent 6850 Series GC System equipped with a capillary column DB-5MS (30 m, 0.32 mm), a FID detector and helium as gas carrier. GC-EIMS analyses were carried out by using a Hewlett-Packard HP 6890N Network GC system/5975 Mass Selective Detector equipped with an electron impact ionizer at 70 eV.  $^1\text{H}$  and  $^{13}\text{C}$  NMR spectra were recorded on a Bruker DRX-ADVANCE 400 MHz ( $^1\text{H}$  at 400 MHz and  $^{13}\text{C}$  at 101 MHz and  $^{19}\text{F}$  at 376 MHz). Chemical shifts are reported in ppm and coupling constants in Hertz. Flash chromatography was carried out on a Büchi Reveleris® X2-UV system. Melting points were collected using Büchi 510 analyser. Elemental Analysis (EA) were conducted on Elementar UNICUBE® elemental analyzer. Palladium content was measured by using an Agilent MP-AES 4210 instrument. Flow systems were implemented using PTFE tubes and PTFE or stainless-steel connectors purchased from Swagelok. The variable back-pressure regulator used was provided by Zaiput Inc. HPLC pumps Shimadzu Prominence LC20-AD were used for the flow procedures.

Characterization data and copies of the  $^1\text{H}$  and  $^{13}\text{C}$  NMR and  $^{19}\text{F}$ NMR are reported below.

## 2. General Assembly of the reactor

The gas-liquid-solid reactor assembly was implemented with a variable (1, 2, 2.5 m) section of Teflon AF2400 tubing (with variable internal diameters 0.79, 1.59, 3.18 mm) placed within PTFE tubing (6 mm o.d.). These tubings were coiled and each end fastened to the proper Swagelok fitting. The liquid inlet section was connected to a stainless-steel T-piece in which the oxygen was supplied. The outlet section was mounted with a T-piece stainless steel connector in which a pressure gauge and a pressure release valve were connected (Figure S1). The heterogeneous catalyst (Pd/C, 10% w/w) was packed inside the Teflon AF2400 tube by placing in the tube outlet a piece of silica wool, then the catalyst was sucked into the inner tube by a vacuum pump. The amount of catalyst used in all experiments was 60 mg.

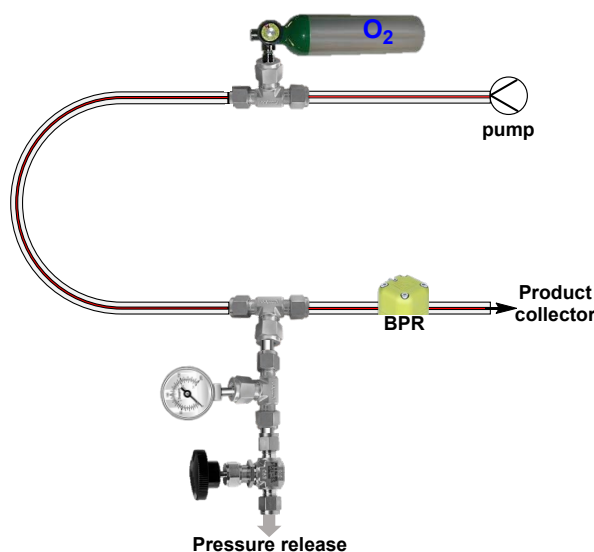

## 3. General Procedures

### 3.1 General flow procedure for the oxidative C–H alkenylation

The flow streams driven by the HPLC pump containing a 0.2 M GVL solution of the starting acetanilides or *N*-methoxybenzamide (**1a-f**, **4a-c**, 1 eq), the olefin (**2a-f**, 1.5 eq), *p*-TsOH (1eq), and *p*-benzoquinone (10 mol%) was directed through the tube-in-tube reactor packed with Pd/C (10% w/w, 60 mg, 0.056 mmol of Pd) placed in a thermostated box at 85 °C, with a flow rate of 15  $\mu\text{L min}^{-1}$  and at a pressure of 5 Bar of O<sub>2</sub>. A back-pressure regulator (5.2 bar) was placed immediately after the gas-liquid-solid reactor. The reaction mixture was continuously pumped with a residence time inside the reactor of 140 min. The reaction mixture at the outlet of the reactor was collected into a flask and the solvent was removed *via* distillation under vacuum and the crude mixture was purified by column chromatography or crystallization.

### 3.2 General procedure for leaching determination

At the outlet of the reactor, samples of the reaction mixture were taken and digested into 2 mL of aqua regia for 1h. The digested material was diluted with milli-Q water to a final volume of 10 mL and the amount of palladium leached in solution was measured with a microwave plasma-atomic emission spectrometer (MP-AES 4210).

#### 4. E-factor calculations

**Ref (18a):** M. D. K. Boele, G. P. F. van Strijdonck, A. H. M. de Vries, P. C. J. Kamer, J. G. de Vries and P. W. N. M. van Leeuwen, *J. Am. Chem. Soc.*, 2002, **124**, 1586–1587

$$[(0.447_{[4\text{-Me-acetanlide}]} + 0.381_{[\text{butyl acrylate}]} + 4.725_{[\text{acetic acid}]} + 2.167_{[\text{toluene}]} + 0.013_{[\text{Pd}(\text{OAc})_2]} + 0.324_{[\text{benzoquinone}]} + 0.286_{[\text{TsOH}]} + 21.390_{[\text{Et}_2\text{O}]} - 0.702_{[\text{product}]}] / 0.702_{[\text{product}]} = \mathbf{41.3}$$

**Ref (18b):** T. Nishikata, B. H. Lipshutz, *Org. Lett.*, 2010, **12**, 1972–1975

$$[(0.041_{[3\text{-OMe-acetanlide}]} + 0.064_{[\text{butyl acrylate}]} + 1.000_{[\text{water}]} + 0.030_{[\text{surfactant}]} + 0.011_{[\text{Pd-cat}]} + 0.027_{[\text{benzoquinone}]} + 0.085_{[\text{AgNO}_3]} - 0.061_{[\text{product}]}] / 0.061_{[\text{product}]} = \mathbf{19.3}$$

**Ref (18c):** F. W. Patureau and F. Glorius, *J. Am. Chem. Soc.*, 2010, **132**, 9982–9983

$$[(0.149_{[4\text{-Me-acetanlide}]} + 0.190_{[\text{butyl acrylate}]} + 4.025_{[\text{t-amyl-alcohol}]} + 0.003_{[\text{Rh-cat}]} + 0.381_{[\text{CuOAc}_2]} + 0.006_{[\text{AgSbF}_6]} - 0.269_{[\text{product}]}] / 0.269_{[\text{product}]} = \mathbf{16.6}$$

**Ref (18c):** F. W. Patureau and F. Glorius, *J. Am. Chem. Soc.*, 2010, **132**, 9982–9983 (*under air*)

$$[(0.149_{[4\text{-Me-acetanlide}]} + 0.190_{[\text{butyl acrylate}]} + 4.025_{[\text{t-amyl-alcohol}]} + 0.003_{[\text{Rh-cat}]} + 0.018_{[\text{CuOAc}_2]} + 0.006_{[\text{AgSbF}_6]} - 0.267_{[\text{product}]}] / 0.267_{[\text{product}]} = \mathbf{15.4}$$

**Ref (18d):** L. L. Chng, J. Zhang, J. Yang, M. Amoura and J. Y. Ying, *Adv. Synth. Catal.*, 2011, **353**, 2988–2998 (heterogeneous catalyst has been recovered and is not accounted in the calculation)

$$[(0.027_{[\text{acetanlide}]} + 0.050_{[\text{butyl acrylate}]} + 0.390_{[\text{toluene}]} + 3.975_{[\text{DCM}]} + 1.965_{[\text{hexane}]} - 0.039_{[\text{product}]}] / 0.039_{[\text{product}]} = \mathbf{160.3}$$

**Ref (18e):** Y. Takahama, Y. Shibata and K. Tanaka, *Chem. Eur. J.*, 2015, **21**, 9053–9056

$$[(0.108_{[\text{acetanlide}]} + 0.034_{[\text{methyl acrylate}]} + 1.568_{[\text{acetone}]} + 0.008_{[\text{Rh-cat}]} + 0.013_{[\text{AgSbF}_6]} + 0.016_{[\text{CuOAc}_2]} - 0.072_{[\text{product}]}] / 0.072_{[\text{product}]} = \mathbf{23.3}$$

**Ref (18f):** G. N. Hermann, P. Becker and C. Bolm, *Angew. Chem., Int. Ed.*, 2015, **54**, 7414–7417

$$[(0.081_{[\text{acetanlide}]} + 0.083_{[\text{butyl acrylate}]} + 0.009_{[\text{Rh-cat}]} + 0.012_{[\text{AgBF}_4]} + 0.027_{[\text{Cu}(\text{OAc})_2]} + 79.5_{[\text{DCM}]} + 54.12_{[\text{EtOAc}]} - 0.111_{[\text{product}]}] / 0.111_{[\text{product}]} = \mathbf{1201.2}$$

**Ref (18g):** C. J. Mulligan, J. S. Parker, K. K. M. Hii, *React. Chem. Eng.*, 2020, **5**, 1104–1111

$$[(0.178_{[4\text{-Me-acetanlide}]} + 0.127_{[\text{butyl acrylate}]} + 12.6_{[\text{acetic acid}]} + 0.011_{[\text{Pd}(\text{OAc})_2]} + 0.108_{[\text{benzoquinone}]} + 0.095_{[\text{TsOH}]} - 0.250_{[\text{product}]}] / 0.250_{[\text{product}]} = \mathbf{51.4}$$

**Ref (18h):** R. Zhu, S. Lu, Q. Wang, J. Bai, Y. Wang, Q. Yu, J. Huang, *Tetrahedron* 2018, **74**, 3879–3887.

$$[(0.027_{[\text{acetanlide}]} + 0.076_{[\text{butyl acrylate}]} + 1.102_{[\text{TFA}]} + 1.256_{[\text{DCE}]} + 0.004_{[\text{Pd}(\text{OAc})_2]} + 0.142_{[\text{selectfluor}]} + 0.095_{[\text{TsOH}]} + 27.06_{[\text{EtOAc}]} - 0.042_{[\text{product}]}] / 0.042_{[\text{product}]} = \mathbf{707.6}$$

**Ref (15c):** F. Ferlin, S. Santoro, L. Ackermann and L. Vaccaro, *Green Chem.*, 2017, **19**, 2510–2514 (*Batch*) (heterogeneous base and catalyst have been recovered and not accounted in the calculation)

$$[(0.067_{[\text{acetanlide}]} + 0.069_{[\text{butyl acrylate}]} + 1.054_{[\text{GVL}]} + 0.108_{[\text{benzoquinone}]} + 2.000_{[\text{NaHCO}_3]} + 1.804_{[\text{EtOAc}]} - 0.124_{[\text{product}]}] / 0.124_{[\text{product}]} = \mathbf{40.1}$$

**Ref (15c):** F. Ferlin, S. Santoro, L. Ackermann and L. Vaccaro, *Green Chem.*, 2017, **19**, 2510–2514 (*Flow*) (heterogeneous catalyst has been recovered and not accounted in the calculation)

$$[(58.121_{[\text{acetanlide}]} + 60.151_{[\text{butyl acrylate}]} + 906.95_{[\text{GVL}]} + 92.961_{[\text{benzoquinone}]} + 81.794_{[\text{TsOH}]} + 1500_{[\text{NaHCO}_3]} + 665_{[\text{EtOAc}]} - 108.996_{[\text{product}]}] / 108.996_{[\text{product}]} = \mathbf{29.8}$$

**This work:**

$$[(0.337_{[\text{acetanlide}]} + 0.476_{[\text{butyl acrylate}]} + 12.655_{[\text{GVL}]} + 0.027_{[\text{benzoquinone}]} + 0.475_{[\text{TsOH}]} - (0.489_{[\text{product}]} + 12.02_{\text{GVL recovered}})] / 0.489_{[\text{product}]} = \mathbf{3.0}$$

## 5. RME and MRP calculation

$$\text{RME} = [(\text{Mass of Product}/(\text{Total input mass} - \text{Mass of recovered materials})) * 100]$$

$$\text{Ref 18a} = [(0.702/(29.735 - 0)) * 100] = \mathbf{2.4}$$

$$\text{Ref 18b} = [(0.061/(1.258 - 0)) * 100] = \mathbf{4.9}$$

$$\text{Ref 18c} = [(0.269/(4.756 - 0)) * 100] = \mathbf{5.7}$$

$$\text{Ref 18c (under air)} = [(0.267/(4.399 - 0)) * 100] = \mathbf{6.1}$$

$$\text{Ref 18d} = [(0.039/(6.408 - 0.001)) * 100] = \mathbf{0.6}$$
 (heterogeneous catalyst recovered)

$$\text{Ref 18e} = [(0.072/(1.784 - 0)) * 100] = \mathbf{4.1}$$

$$\text{Ref 18f} = [(0.111/(133.833 - 0)) * 100] = \mathbf{0.1}$$

$$\text{Ref 18g} = [(0.250/(13.120 - 0)) * 100] = \mathbf{1.9}$$

$$\text{Ref 18h} = [(0.042/(29.763 - 0)) * 100] = \mathbf{0.1}$$

$$\text{Ref 15c} = [(0.124/(5.104 - 0.163)) * 100] = \mathbf{2.5}$$
 (heterogeneous catalyst and base recovered)

$$\text{Ref 15c} = [(108.996/(3364.983 - 2.00)) * 100] = \mathbf{3.2}$$
 (heterogeneous catalyst recovered)

$$\text{This work} = [(0.489/(13.972 - 12.082)) * 100] = \mathbf{25.8}$$
 (solvent and heterogeneous catalyst recovered)

$$\text{MRP} = [(RME/100) * (\text{Stoichiometric factor})] / [(AE/100) * (\text{Yield}/100)]$$

Stoichiometric factor (SF) = (Actual mass of reagent)/(Stoichiometric mass of reagent)

AE is 99.6 % for all the protocols analyzed

$$\text{Ref 18a: SF} = 1 \quad \text{MRP} = [(2.4/100) * (1)] / [(0.996) * (85/100)] = \mathbf{0.028}$$

$$\text{Ref 18b: SF} = 1.43 \quad \text{MRP} = [(4.9/100) * (1.43)] / [(0.996) * (85/100)] = \mathbf{0.083}$$

$$\text{Ref 18c: SF} = 1.23 \quad \text{MRP} = [(5.7/100) * (1.23)] / [(0.996) * (98/100)] = \mathbf{0.071}$$

$$\text{Ref 18c (under air): SF} = 1.23 \quad \text{MRP} = [(6.1/100) * (1.23)] / [(0.996) * (97/100)] = \mathbf{0.077}$$

$$\text{Ref 18d: SF} = 1.48 \quad \text{MRP} = [(0.6/100) * (1.48)] / [(0.996) * (76/100)] = \mathbf{0.012}$$

$$\text{Ref 18e: SF} = 1.61 \quad \text{MRP} = [(4.1/100) * (1.68)] / [(0.996) * (82/100)] = \mathbf{0.084}$$

$$\text{Ref 18f: SF} = 1.05 \quad \text{MRP} = [(0.1/100) * (1.05)] / [(0.996) * (71/100)] = \mathbf{0.001}$$

$$\text{Ref 18g: SF} = 1.11 \quad \text{MRP} = [(1.9/100) * (1.11)] / [(0.996) * (91/100)] = \mathbf{0.023}$$

$$\text{Ref 18h: SF} = 1.97 \quad \text{MRP} = [(0.1/100) * (1.97)] / [(0.996) * (80/100)] = \mathbf{0.002}$$

$$\text{Ref 15c: SF} = 1.05 \quad \text{MRP} = [(2.5/100) * (1.05)] / [(0.996) * (95/100)] = \mathbf{0.027}$$

$$\text{Ref 15c: SF} = 1.05 \quad \text{MRP} = [(3.2/100) * (1.05)] / [(0.996) * (97/100)] = \mathbf{0.035}$$

$$\text{This work: SF} = 1.24 \quad \text{MRP} = [(25.8/100) * (1.24)] / [(0.996) * (75/100)] = \mathbf{0.428}$$

## 6. Substrates scope using 20 mol% of *p*-benzoquinone in Flow

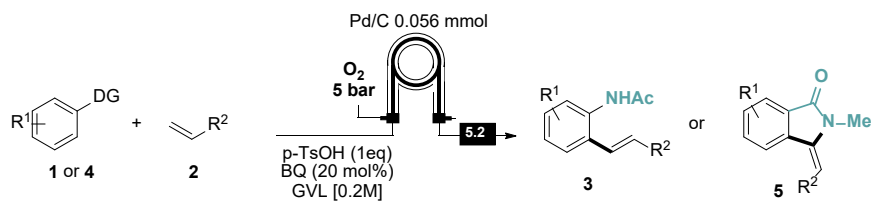

### Scope of acetanilides

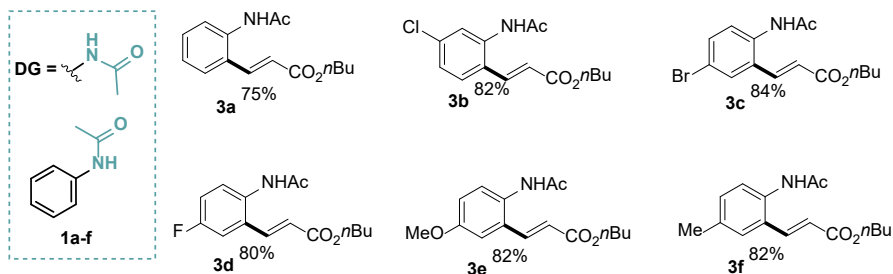

### Scope of *N*-methoxy benzamides

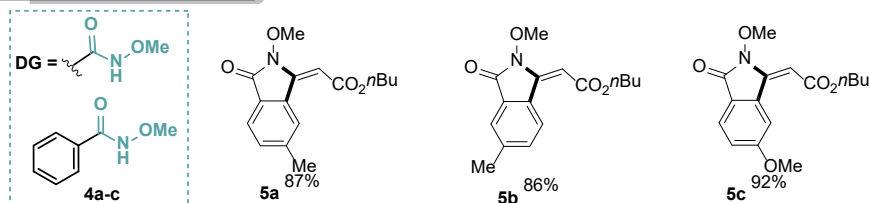

### Scope of olefinic partner

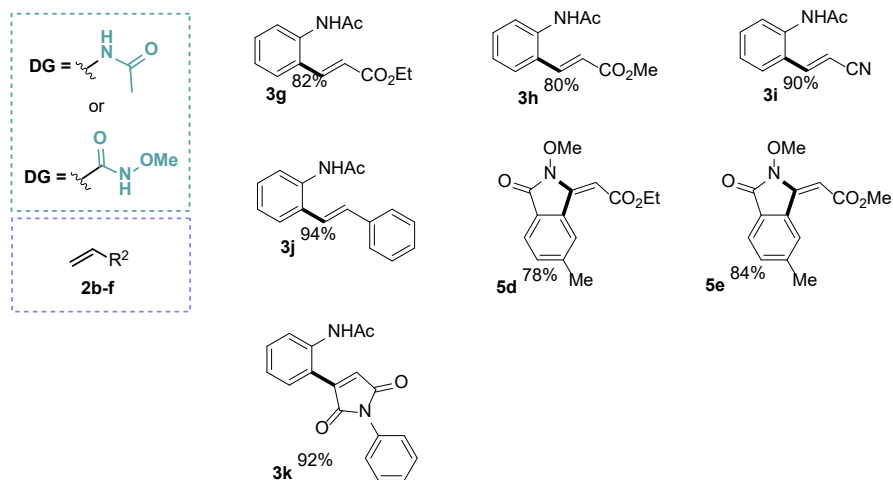

## 7. Characterization data of products

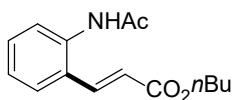

**butyl (E)-3-(2-acetamidophenyl)acrylate (3a):** The general flow procedure was followed using *N*-phenylacetamide (**1a**) (337.9 mg, 2.5 mmol) and butyl acrylate (**2a**) (537  $\mu$ L, 3.75 mmol). Purification by column chromatography (petroleum ether/EtOAc: 4/1) yielded **3a** (489.9 mg, 75%) as white solid. **M.p.** 82-85 °C. **<sup>1</sup>H NMR** (400 MHz, CDCl<sub>3</sub>)  $\delta$  7.80 (d, *J* = 15.8 Hz, 1H), 7.70 (d, *J* = 8.2 Hz, 1H), 7.55 – 7.53 (m, 2H), 7.36 (t, *J* = 7.8 Hz, 1H), 7.18 (t, *J* = 7.6 Hz, 1H), 6.38 (d, *J* = 15.7 Hz, 1H), 4.18 (t, *J* = 6.7 Hz, 2H), 2.21 (s, 3H), 1.70 – 1.63 (m, 2H), 1.46 – 1.37 (m, 2H), 0.95 (t, *J* = 7.4 Hz, 3H). **<sup>13</sup>C NMR** (101 MHz, CDCl<sub>3</sub>)  $\delta$  169.1, 167.0, 139.5, 136.0, 130.9, 127.9, 127.2, 126.0, 125.5, 120.6, 64.8, 30.8, 24.2, 19.3, 13.9. **GC-EIMS (m/z, %):** 261 (M<sup>+</sup>, 80), 219 (25), 146 (100), 128 (43), 126 (25). **Elemental Analysis:** Calc: C, 68.94; H, 7.33; N, 5.36. Found: C, 68.93; H, 7.34; N, 5.37.

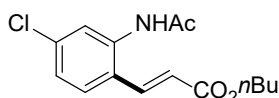

**butyl (E)-3-(2-acetamido-4-chlorophenyl)acrylate (3b):** The general flow procedure was followed using *N*-(3-chlorophenyl)acetamide (**1b**) (424.0 mg, 2.5 mmol) and butyl acrylate (**2a**) (537  $\mu$ L, 3.75 mmol). Purification by column chromatography (petroleum ether/EtOAc: 4/1  $\rightarrow$  3/1) yielded **3b** (598.9 mg, 81%) as off-white solid. **M.p.** 152-154 °C. **<sup>1</sup>H NMR** (400 MHz, CDCl<sub>3</sub>)  $\delta$  7.72 – 7.66 (m, 3H), 7.48 – 7.46 (m, 1H), 7.39 (s, 1H), 6.38 (d, *J* = 15.8 Hz, 1H), 4.20 (t, *J* = 6.7 Hz, 2H), 2.21 (s, 3H), 1.71 – 1.64 (m, 2H), 1.47 – 1.36 (m, 2H), 0.96 (t, *J* = 7.4 Hz, 3H). **<sup>13</sup>C NMR** (101 MHz, CDCl<sub>3</sub>)  $\delta$  169.0, 166.7, 137.9, 134.9, 133.6, 129.9, 129.3, 126.7, 122.1, 119.1, 65.0, 30.8, 24.3, 19.3, 13.9. **GC-EIMS (m/z, %):** 295 (M<sup>+</sup>, 45), 253 (30), 182 (45), 180 (100), 162 (50), 154 (25). **Elemental Analysis:** Calc: C, 60.92; H, 6.13; N, 4.74. Found: C, 60.91; H, 6.15; N, 4.73.

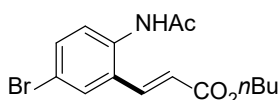

**butyl (E)-3-(2-acetamido-5-bromophenyl)acrylate (3c):** The general flow procedure was followed using *N*-(4-bromophenyl)acetamide (**1c**) (535.1 mg, 2.5 mmol) and butyl acrylate (**2a**) (537  $\mu$ L, 3.75 mmol). Purification by column chromatography (petroleum ether/EtOAc: 4/1  $\rightarrow$  3/1) yielded **3c** (714.4 mg, 84%) as off-white solid. **M.p.** 121-123 °C. **<sup>1</sup>H NMR** (400 MHz, CDCl<sub>3</sub>)  $\delta$  7.83 – 7.77 (m, 2H), 7.70 (d, *J* = 15.8 Hz, 1H), 7.42 (d, *J* = 8.5 Hz, 1H), 7.11 (d, *J* = 8.2 Hz, 1H), 6.32 (d, *J* = 15.7 Hz, 1H), 4.16 (t, *J* = 6.7 Hz, 2H), 2.20 (s, 3H), 1.68 – 1.61 (m, 2H), 1.44 – 1.35 (m, 2H), 0.93 (t, *J* = 7.4 Hz, 4H). **<sup>13</sup>C NMR** (101 MHz, CDCl<sub>3</sub>)  $\delta$  169.2, 166.9, 138.4, 137.0, 136.5, 128.0, 126.0, 125.8, 125.1, 120.8, 64.9, 30.8, 24.2, 19.3, 13.8. **GC-EIMS (m/z, %):** 341 (M<sup>+</sup>+1, 25), 339 (M<sup>+</sup>-1, 25), 299 (28), 297 (28), 224 (100), 198 (35). **Elemental Analysis:** Calc: C, 52.96; H, 5.33; N, 4.12. Found: C, 52.95; H, 5.34; N, 4.14.

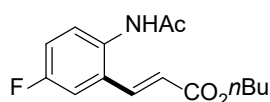

**butyl (E)-3-(2-acetamido-5-fluorophenyl)acrylate (3d):** The general flow procedure was followed using *N*-(4-fluorophenyl)acetamide (**1d**) (382.9 mg, 2.5 mmol) and butyl acrylate (**2a**) (537  $\mu$ L, 3.75 mmol). Purification by column chromatography (petroleum ether/EtOAc: 4/1) yielded **3d** (558.6 mg, 80%) as white solid. **M.p.** 137-139  $^{\circ}$ C.  **$^1$ H NMR** (400 MHz,  $\text{CDCl}_3$ )  $\delta$  7.73 (d,  $J$  = 15.9 Hz, 1H), 7.62 (dd,  $J$  = 8.9, 5.2 Hz, 1H), 7.38 (s, 1H), 7.24 (dd,  $J$  = 9.2, 3.0 Hz, 1H), 7.07 (td,  $J$  = 8.3, 2.9 Hz, 1H), 6.37 (d,  $J$  = 15.9 Hz, 1H), 4.20 (t,  $J$  = 6.7 Hz, 2H), 2.21 (s, 3H), 1.71 – 1.64 (m, 2H), 1.47 – 1.37 (m, 2H), 0.96 (t,  $J$  = 7.4 Hz, 4H).  **$^{13}$ C NMR** (101 MHz,  $\text{CDCl}_3$ )  $\delta$  169.2, 166.7, 160.5 ( $^1J_{\text{C-F}}$  = 246), 138.3, 132.0, 130.2 ( $^3J_{\text{C-F}}$  = 8), 127.9 ( $^3J_{\text{C-F}}$  = 8), 121.8, 117.8 ( $^2J_{\text{C-F}}$  = 23), 113.3 ( $^2J_{\text{C-F}}$  = 23), 65.0, 30.8, 24.1, 19.3, 13.9.  **$^{19}$ F NMR** (376 MHz,  $\text{CDCl}_3$ )  $\delta$  -115.41 (q,  $J$  = 7.8 Hz). **GC-EIMS (m/z, %):** 279 ( $M^+$ , 28), 237 (50), 164 (100), 136 (44), 135 (25). **Elemental Analysis:** Calc: C, 64.50; H, 6.50; N, 5.01. Found: C, 64.48; H, 6.51; N, 5.02.

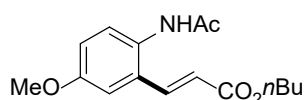

**butyl (E)-3-(2-acetamido-5-methoxyphenyl)acrylate (3e):** The general flow procedure was followed using *N*-(4-methoxyphenyl)acetamide (**1e**) (412.9 mg, 2.5 mmol) and butyl acrylate (**2a**) (537  $\mu$ L, 3.75 mmol). Purification by crystallization (hexane/acetone: 9/1) yielded **3e** (582.7 mg, 80%) as off-white solid. **M.p.** 128-130  $^{\circ}$ C.  **$^1$ H NMR** (400 MHz,  $\text{CDCl}_3$ )  $\delta$  7.76 (d,  $J$  = 15.9 Hz, 1H), 7.49 (d,  $J$  = 8.8 Hz, 1H), 7.07 (d,  $J$  = 2.9 Hz, 2H), 6.96 – 6.93 (m, 2H), 6.38 (d,  $J$  = 15.9 Hz, 1H), 4.21 (t,  $J$  = 6.7 Hz, 2H), 3.82 (s, 3H), 2.21 (s, 3H), 1.72 – 1.65 (m, 2H), 1.48 – 1.39 (m, 2H), 0.96 (t,  $J$  = 7.4 Hz, 3H).  **$^{13}$ C NMR** (101 MHz,  $\text{CDCl}_3$ )  $\delta$  169.2, 166.9, 157.9, 139.4, 130.1, 129.0, 127.9, 120.9, 117.0, 111.4, 64.8, 55.7, 30.9, 24.1, 19.3, 13.9. **GC-EIMS (m/z, %):** 291 ( $M^+$ , 45), 249 (20), 176 (100), 175 (52). **Elemental Analysis:** Calc: C, 65.96; H, 7.27; N, 4.81. Found: C, 65.96; H, 7.29; N, 4.82.

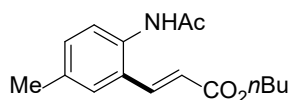

**butyl (E)-3-(2-acetamido-5-methylphenyl)acrylate (3f):** The general flow procedure was followed using *N*-(*p*-tolyl)acetamide (**1f**) (372.9 mg, 2.5 mmol) and butyl acrylate (**2a**) (537  $\mu$ L, 3.75 mmol). Purification by crystallization (hexane/acetone: 9/1) yielded **3f** (564.4 mg, 82%) as white solid. **M.p.** 127-129  $^{\circ}$ C.  **$^1$ H NMR** (400 MHz,  $\text{CDCl}_3$ )  $\delta$  7.77 (d,  $J$  = 15.9 Hz, 1H), 7.55 (d,  $J$  = 8.2 Hz, 1H), 7.36 (s, 1H), 7.29 (s, 1H), 7.18 (d,  $J$  = 8.2 Hz, 1H), 6.38 (d,  $J$  = 15.9 Hz, 1H), 4.19 (t,  $J$  = 6.6 Hz, 2H), 2.33 (s, 3H), 2.21 (s, 3H), 1.69 – 1.64 (m, 2H), 1.45 – 1.40 (m, 2H), 0.96 (t,  $J$  = 7.4 Hz, 3H).  **$^{13}$ C NMR** (101 MHz,  $\text{CDCl}_3$ )  $\delta$  169.1, 167.1, 139.5, 135.9, 133.5, 131.7, 128.0, 127.5, 125.7, 120.4, 64.7, 30.8, 24.2, 21.0, 19.3, 13.9. **GC-EIMS (m/z, %):** 275 ( $M^+$ , 45), 233 (15), 161 (18), 160 (100), 142 (25). **Elemental Analysis:** Calc: C, 69.79; H, 7.69; N, 5.09. Found: C, 69.80; H, 7.70; N, 5.07.



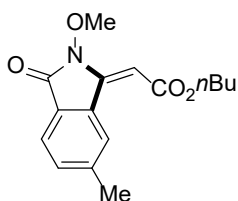

**butyl (E)-2-(2-methoxy-6-methyl-3-oxoisindolin-1-ylidene)acetate (5a):** The general flow procedure was followed using *N*-methoxy-4-methylbenzamide (**4a**) (412.9 mg, 2.5 mmol) and butyl acrylate (**2a**) (537  $\mu$ L, 3.75 mmol). Purification by column chromatography (petroleum ether/EtOAc: 6/1  $\rightarrow$  4/1) yielded **5a** (622.1 mg, 86%) as white solid. **M.p.** 62-64  $^{\circ}$ C.  **$^1$ H NMR** (400 MHz,  $\text{CDCl}_3$ )  $\delta$  8.81 (s, 1H), 7.71 (d,  $J$  = 7.7 Hz, 1H), 7.39 (d,  $J$  = 7.7 Hz, 1H), 5.95 (s, 1H), 4.22 (t,  $J$  = 6.7 Hz, 2H), 4.01 (s, 3H), 2.50 (s, 3H), 1.72 – 1.67 (m, 2H), 1.48 – 1.42 (m, 2H), 0.96 (t,  $J$  = 7.4 Hz, 3H).  **$^{13}$ C NMR** (101 MHz,  $\text{CDCl}_3$ )  $\delta$  166.2, 161.9, 144.7, 144.1, 132.3, 130.5, 128.8, 124.9, 123.3, 97.5, 64.7, 64.4, 30.9, 22.5, 19.3, 13.9. **GC-EIMS (m/z, %):** 289 ( $M^+$ , 20), 259 (77), 258 (20), 202 (100), 158 (25). **Elemental Analysis:** Calc: C, 66.42; H, 6.62; N, 4.84. Found: C, 66.40; H, 6.63; N, 4.85.

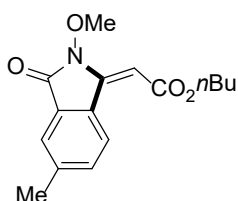

**butyl (E)-2-(2-methoxy-5-methyl-3-oxoisindolin-1-ylidene)acetate (5b):** The general flow procedure was followed using *N*-methoxy-3-methylbenzamide (**4b**) (412.9 mg, 2.5 mmol) and butyl acrylate (**2a**) (537  $\mu$ L, 3.75 mmol). Purification by column chromatography (petroleum ether/EtOAc: 6/1  $\rightarrow$  4/1) yielded **5b** (607.6 mg, 84%) as white solid. **M.p.** 79-81  $^{\circ}$ C.  **$^1$ H NMR** (400 MHz,  $\text{CDCl}_3$ )  $\delta$  8.85 (d,  $J$  = 8.0 Hz, 1H), 7.63 (s, 1H), 7.46 (d,  $J$  = 8.0 Hz, 1H), 5.93 (s, 1H), 4.21 (t,  $J$  = 6.7 Hz, 2H), 4.02 (s, 3H), 2.46 (s, 3H), 1.73 – 1.66 (m, 2H), 1.47 – 1.41 (m, 2H), 0.96 (t,  $J$  = 7.4 Hz, 3H).  **$^{13}$ C NMR** (101 MHz,  $\text{CDCl}_3$ )  $\delta$  166.2, 162.0, 144.1, 142.5, 134.3, 128.2, 127.7, 123.8, 97.1, 64.6, 64.5, 30.9, 21.8, 19.3, 13.9. **GC-EIMS (m/z, %):** 289 ( $M^+$ , 15), 260 (35), 259 (45), 202 (100), 147 (80). **Elemental Analysis:** Calc: C, 66.42; H, 6.62; N, 4.84. Found: Calc: C, 66.43; H, 6.63; N, 4.82.

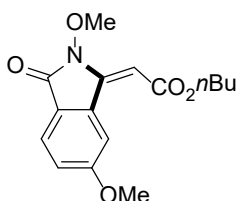

**butyl (E)-2-(2,6-dimethoxy-3-oxoisindolin-1-ylidene)acetate (5c):** The general flow procedure was followed using *N*,4-dimethoxybenzamide (**4c**) (452.9 mg, 2.5 mmol) and butyl acrylate (**2a**) (537  $\mu$ L, 3.75 mmol). Purification by column chromatography (petroleum ether/EtOAc: 6/1  $\rightarrow$  4/1) yielded **5c** (687.0 mg, 90%) as white solid. **M.p.** 88-90  $^{\circ}$ C.  **$^1$ H NMR** (400 MHz,  $\text{CDCl}_3$ )  $\delta$  8.65 (s, 1H), 7.71 (d,  $J$  = 8.3 Hz, 1H), 7.06 (d,  $J$  = 8.3 Hz, 1H), 5.93 (s, 1H), 4.20 (t,  $J$  = 6.7 Hz, 2H), 4.00 (s, 3H), 3.91 (s, 3H), 1.69 (p,  $J$  = 7.0 Hz, 2H), 1.43 (q,  $J$  = 7.5 Hz, 2H), 0.95 (t,  $J$  = 7.3 Hz, 3H).  **$^{13}$ C NMR** (101 MHz,  $\text{CDCl}_3$ )  $\delta$  166.1, 164.4, 161.9, 144.1, 132.5,

124.9, 119.6, 118.1, 113.1, 97.5, 64.6, 64.4, 55.9, 30.8, 19.3, 13.8. **GC-EIMS (m/z, %):** 305 (M<sup>+</sup>, 35), 274 (55), 233 (22), 193 (100), 191 (58), 163 (24). **Elemental Analysis:** Calc: C, 62.94; H, 6.27; N, 4.59. Found: C, 62.93; H, 6.26; N, 4.60.

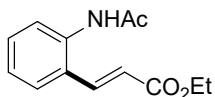

**ethyl (E)-3-(2-acetamidophenyl)acrylate (3g):** The general flow procedure was followed using *N*-phenylacetamide (**1a**) (337.9 mg, 2.5 mmol) and ethyl acrylate (**2b**) (408  $\mu$ L, 3.75 mmol). Purification by column chromatography (petroleum ether/EtOAc: 4/1  $\rightarrow$  2/1) yielded **3g** (478.1 mg, 82%) as white solid. **M.p.** 140-143  $^{\circ}$ C. **<sup>1</sup>H NMR** (400 MHz, CDCl<sub>3</sub>)  $\delta$  7.79 (dd,  $J$  = 15.8, 2.9 Hz, 1H), 7.74 – 7.55 (m, 2H), 7.55 – 7.49 (m, 1H), 7.37 – 7.32 (m, 1H), 7.19 – 7.14 (m, 1H), 6.36 (dd,  $J$  = 15.8, 6.6 Hz, 1H), 4.26 – 4.21 (m, 2H), 2.19 (d,  $J$  = 7.2 Hz, 3H), 1.31 (td,  $J$  = 7.1, 4.0 Hz, 3H). **<sup>13</sup>C NMR** (101 MHz, CDCl<sub>3</sub>)  $\delta$  169.2, 166.9, 139.6, 136.1, 130.8, 127.9, 127.2, 126.0, 125.6, 120.4, 60.8, 24.2, 14.4. **GC-EIMS (m/z, %):** 233 (M<sup>+</sup>, 45), 191 (25), 146 (100), 145 (48), 128 (52), 118 (36). **Elemental Analysis:** Calc: C, 66.94; H, 6.48; N, 6.00. Found: C, 66.92; H, 6.49; N, 6.01.

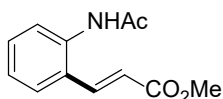

**methyl (E)-3-(2-acetamidophenyl)acrylate (3h):** The general flow procedure was followed using *N*-phenylacetamide (**1a**) (337.9 mg, 2.5 mmol) and methyl acrylate (**2c**) (338  $\mu$ L, 3.75 mmol). Purification by column chromatography (petroleum ether/EtOAc: 4/1  $\rightarrow$  2/1) yielded **3h** (438.4 mg, 80%) as off-white solid. **M.p.** 136-138  $^{\circ}$ C. **<sup>1</sup>H NMR** (400 MHz, CDCl<sub>3</sub>)  $\delta$  7.80 (d,  $J$  = 15.8 Hz, 1H), 7.67 – 7.63 (m, 2H), 7.52 (d,  $J$  = 7.8 Hz, 1H), 7.35 (t,  $J$  = 7.6 Hz, 1H), 7.17 (t,  $J$  = 7.6 Hz, 1H), 6.36 (d,  $J$  = 15.7 Hz, 1H), 3.78 (s, 3H), 2.20 (s, 3H). **<sup>13</sup>C NMR** (101 MHz, CDCl<sub>3</sub>)  $\delta$  169.2, 167.3, 139.8, 136.1, 130.9, 127.9, 127.2, 126.1, 125.6, 120.1, 51.9, 24.2. **GC-EIMS (m/z, %):** 219 (M<sup>+</sup>, 25), 177 (32), 176 (46), 146 (100), 118 (55). **Elemental Analysis:** Calc: C, 65.74; H, 5.98; N, 6.39. Found: C, 65.73; H, 5.97; N, 6.40.

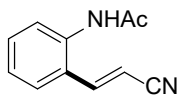

**(E)-N-(2-(2-cyanovinyl)phenyl)acetamide (3i):** The general flow procedure was followed using *N*-phenylacetamide (**1a**) (337.9 mg, 2.5 mmol) and acrylonitrile (**2d**) (246  $\mu$ L, 3.75 mmol). Purification by crystallization (hexane/acetone: 9/1) yielded **3i** (418.9 mg, 90%) as pale brown solid. **M.p.** 171-174  $^{\circ}$ C. **<sup>1</sup>H NMR** (400 MHz, CDCl<sub>3</sub>)  $\delta$  7.61 – 7.57 (m, 3H), 7.48 – 7.42 (m, 2H), 7.40 – 7.21 (m, 1H), 5.82 (d,  $J$  = 16.5 Hz, 1H), 2.22 (s, 3H). **<sup>13</sup>C NMR** (101 MHz, CDCl<sub>3</sub>)  $\delta$  169.3, 146.4, 135.6, 131.8, 127.7, 126.4, 126.1, 126.1, 118.3, 97.8, 23.9. **GC-EIMS (m/z, %):** 186 (M<sup>+</sup>, 28), 171 (25), 144 (100), 117 (70). **Elemental Analysis:** Calc: C, 70.95; H, 5.41; N, 15.04. Found: C, 70.93; H, 5.42; N, 15.03.

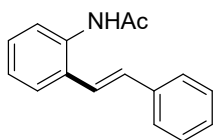

**(E)-N-(2-styrylphenyl)acetamide (3j):** The general flow procedure was followed using *N*-phenylacetamide (**1a**) (337.9 mg, 2.5 mmol) and styrene (**2e**) (430  $\mu$ L, 3.75 mmol). Purification by crystallization (hexane/acetone: 9/1) yielded **3j** (551.7 mg, 93%) as white solid. **M.p.** 141-143 °C. **<sup>1</sup>H NMR** (400 MHz, CDCl<sub>3</sub>)  $\delta$  7.80 – 7.76 (m, 1H), 7.54 – 7.50 (m, 3H), 7.40 – 7.36 (m, 2H), 7.32 – 7.28 (m, 2H), 7.20 – 7.11 (m, 2H), 6.99 (d, *J* = 16.1 Hz, 1H), 2.20 (s, 3H). **<sup>13</sup>C NMR** (101 MHz, CDCl<sub>3</sub>)  $\delta$  168.7, 137.1, 134.8, 132.6, 132.5, 130.5, 128.9, 128.5, 128.3, 127.0, 126.8, 125.8, 124.5, 124.4, 123.6, 24.4. **GC-EIMS (m/z, %):** 237 (M<sup>+</sup>, 34), 222 (18), 195 (20), 194 (100), 165 (32). **Elemental Analysis:** Calc: C, 80.98; H, 6.37; N, 5.90. Found: C, 80.97; H, 6.38; N, 5.91.

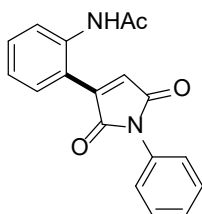

**N-(2-(2,5-dioxo-1-phenyl-2,5-dihydro-1H-pyrrol-3-yl)phenyl)acetamide (3k):** The general flow procedure was followed using *N*-phenylacetamide (**1a**) (337.9 mg, 2.5 mmol) and *N*-phenylmaleimide (**2f**) (649.4 mg, 3.75 mmol). Purification by column chromatography (petroleum ether/EtOAc: 6/1  $\rightarrow$  4/1) yielded **3k** (704.5 mg, 92%) as pale-yellow solid. **M.p.** 165-167 °C. **<sup>1</sup>H NMR** (400 MHz, CDCl<sub>3</sub>)  $\delta$  8.91 (s, 1H), 7.87 (d, *J* = 8.2 Hz, 1H), 7.53 – 7.47 (m, 4H), 7.44 – 7.37 (m, 3H), 7.29 – 7.25 (m, 1H), 6.80 (s, 1H), 2.12 (s, 3H). **<sup>13</sup>C NMR** (101 MHz, CDCl<sub>3</sub>)  $\delta$  170.9, 169.0, 168.5, 146.2, 135.6, 132.3, 131.2, 131.1, 129.4, 128.7, 128.4, 126.3, 126.2, 126.0, 122.5, 24.5. **GC-EIMS (m/z, %):** 306 (M<sup>+</sup>, 100), 264 (74), 246 (33), 235 (21), 219 (25), 172 (68). **Elemental Analysis:** Calc: C, 70.58; H, 4.61; N, 9.15. Found: C, 70.56; H, 4.62; N, 9.16.

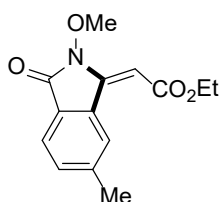

**ethyl (E)-2-(2-methoxy-6-methyl-3-oxoisindolin-1-ylidene)acetate (5d):** The general flow procedure was followed using *N*-methoxy-4-methylbenzamide (**4a**) (412.9 mg, 2.5 mmol) and ethyl acrylate (**2b**) (408  $\mu$ L, 3.75 mmol). Purification by column chromatography (petroleum ether/EtOAc: 6/1  $\rightarrow$  4/1) yielded **5d** (509.4 mg, 78%) as colorless oil. **<sup>1</sup>H NMR** (400 MHz, CDCl<sub>3</sub>)  $\delta$  8.77 (s, 1H), 7.67 (d, *J* = 7.7 Hz, 1H), 7.35 (d, *J* = 7.7 Hz, 1H), 5.91 (s, 1H), 4.25 (q, *J* = 7.1 Hz, 2H), 3.99 (s, 3H), 2.47 (s, 3H), 1.33 (t, *J* = 7.1 Hz, 3H). **<sup>13</sup>C NMR** (101 MHz, CDCl<sub>3</sub>)  $\delta$  166.0, 161.8, 144.6, 144.0, 132.3, 130.4, 128.7, 124.8, 123.2, 97.4, 64.3, 60.6, 22.4, 14.4. **GC-EIMS (m/z, %):** 261 (M<sup>+</sup>, 28), 231 (25), 217 (100), 216 (58), 176 (25), 175 (17). **Elemental Analysis:** Calc: C, 64.36; H, 5.79; N, 5.36. Found: C, 64.35; H, 5.78; N, 5.37.

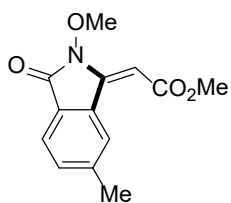

**ethyl (E)-2-(2-methoxy-6-methyl-3-oxoisindolin-1-ylidene)acetate (5e):** The general flow procedure was followed using *N*-methoxy-4-methylbenzamide (**4a**) (412.9 mg, 2.5 mmol) and methyl acrylate (**2c**) (338  $\mu$ L, 3.75 mmol). Purification by column chromatography (petroleum ether/EtOAc: 6/1  $\rightarrow$  4/1) yielded **5e** (506.8 mg, 82%) as colorless oil. **<sup>1</sup>H NMR** (400 MHz, CDCl<sub>3</sub>)  $\delta$  8.77 (s, 1H), 7.68 (d, *J* = 7.6 Hz, 1H), 7.36 (d, *J* = 7.7 Hz, 1H), 5.92 (s, 1H), 3.99 (s, 3H), 3.80 (s, 3H), 2.47 (s, 3H). **<sup>13</sup>C NMR** (101 MHz, CDCl<sub>3</sub>)  $\delta$  166.4, 161.8, 144.7, 144.3, 132.3, 130.4, 128.7, 124.8, 123.2, 96.8, 64.3, 51.8, 22.4. **GC-EIMS (m/z, %):** 247 (M<sup>+</sup>, 15), 231 (44), 217 (100), 216 (18), 147(20). **Elemental Analysis:** Calc: C, 63.15; H, 5.30; N, 5.67. Found: C, 63.17; H, 5.29; N, 5.66.

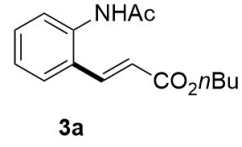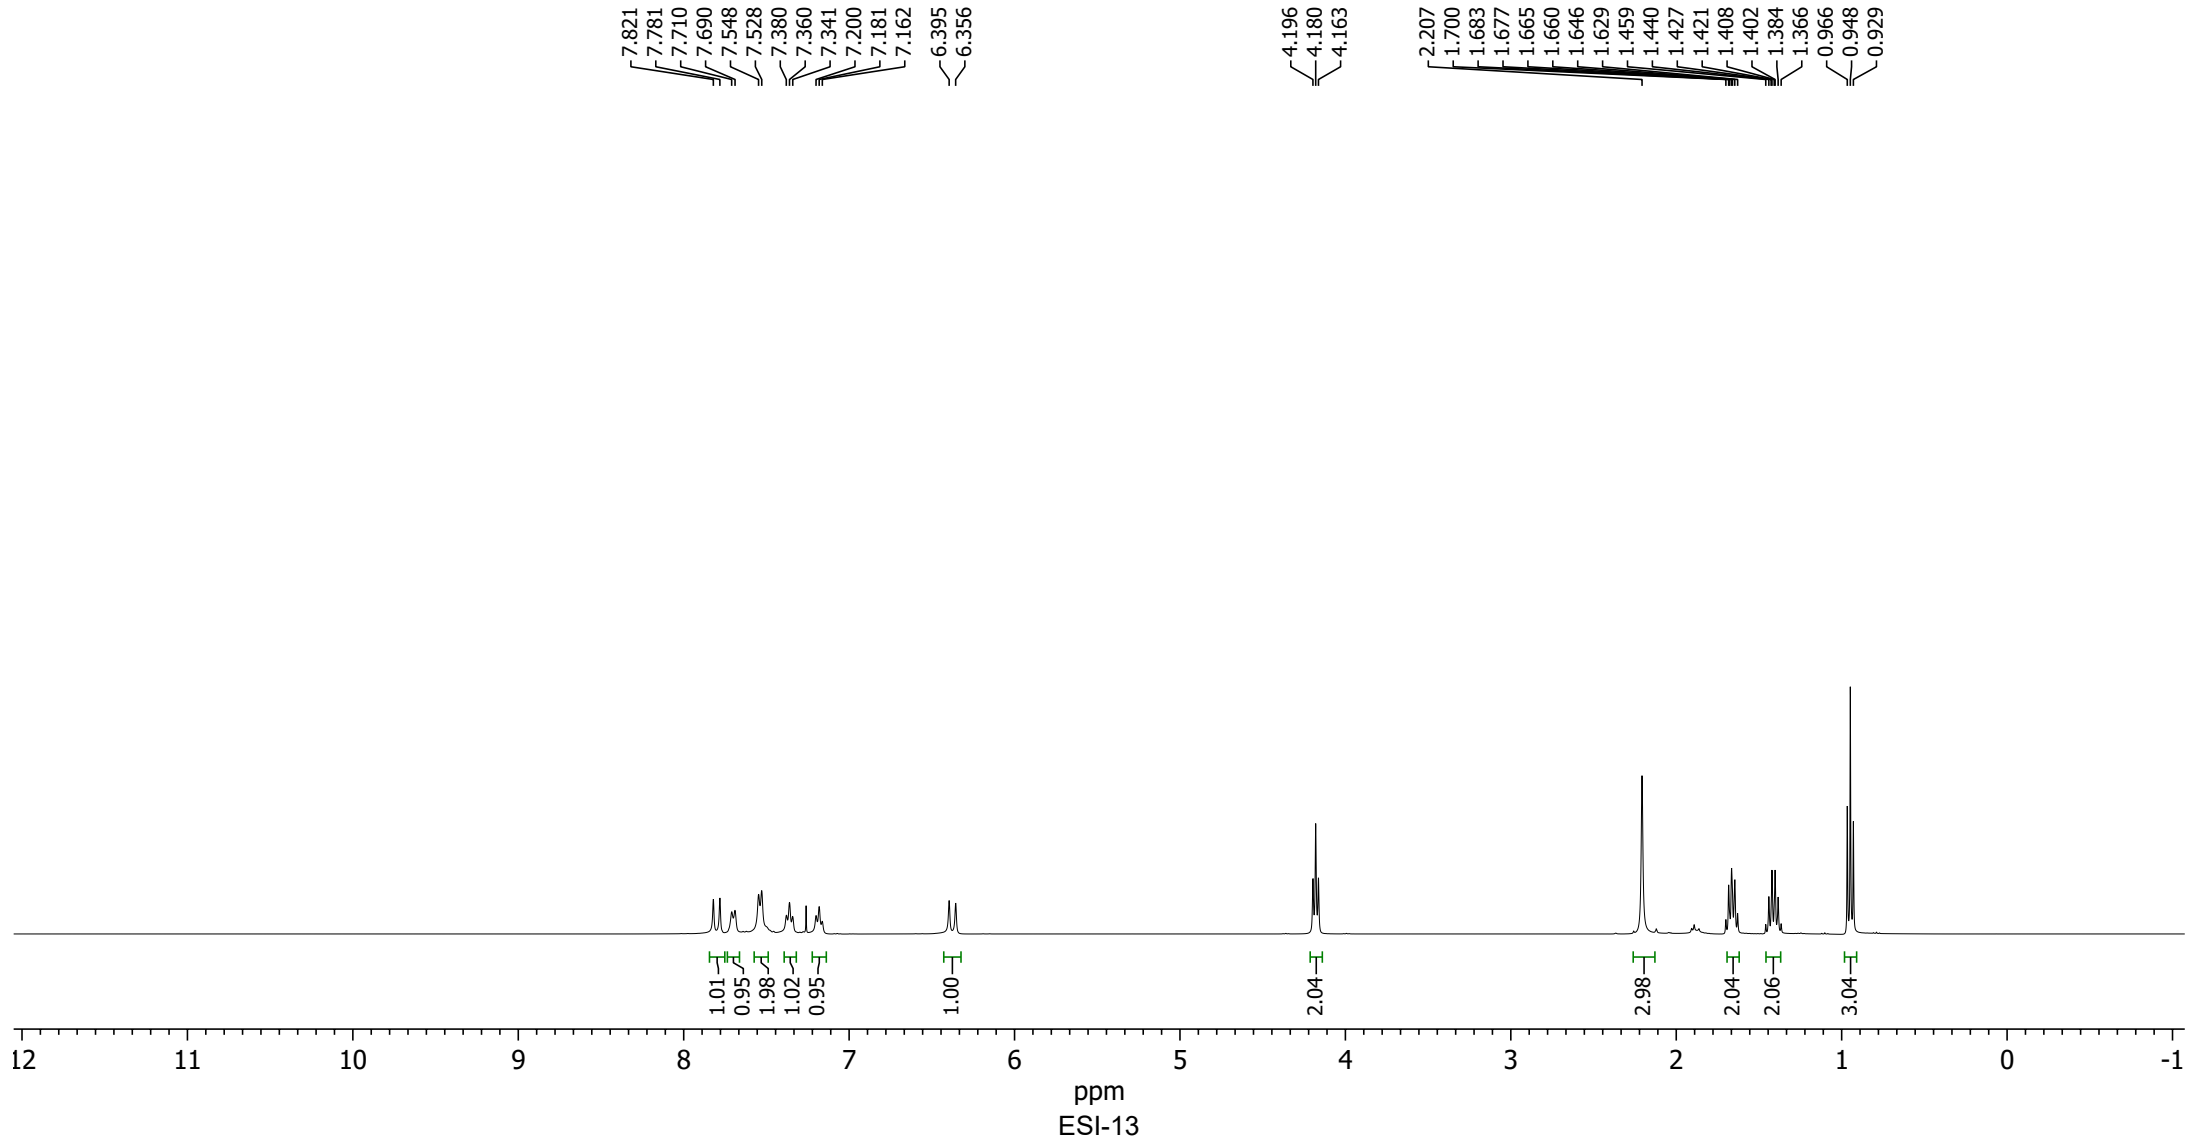

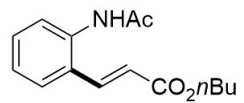

**3a**

— 169.078  
— 167.023

— 139.450  
— 136.007  
/ 130.871  
/ 127.847  
/ 127.179  
/ 126.013  
— 125.471  
— 120.644

— 64.756

— 30.817  
— 24.222  
— 19.290  
— 13.846

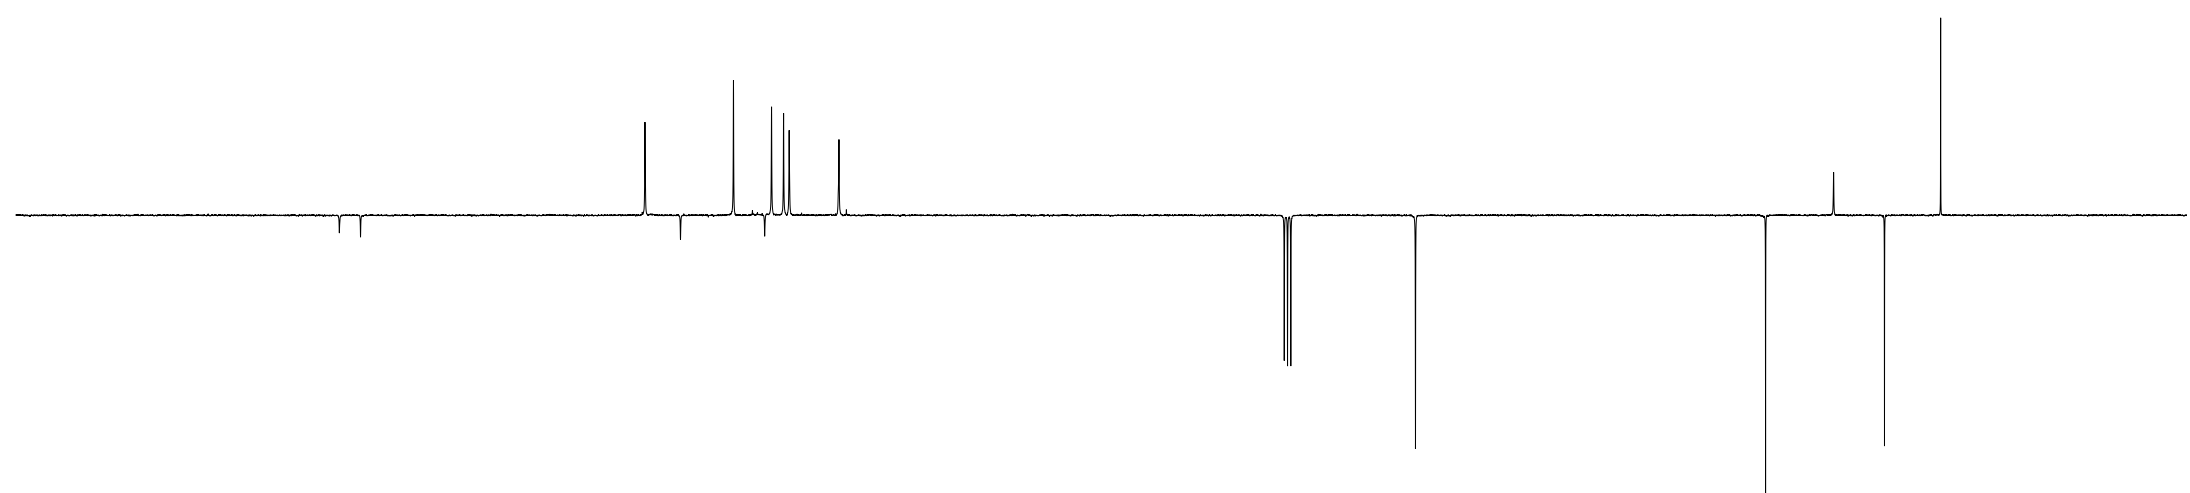

00 180 160 140 120 100 80 60 40 20 0

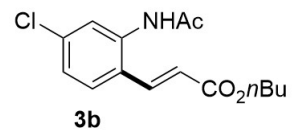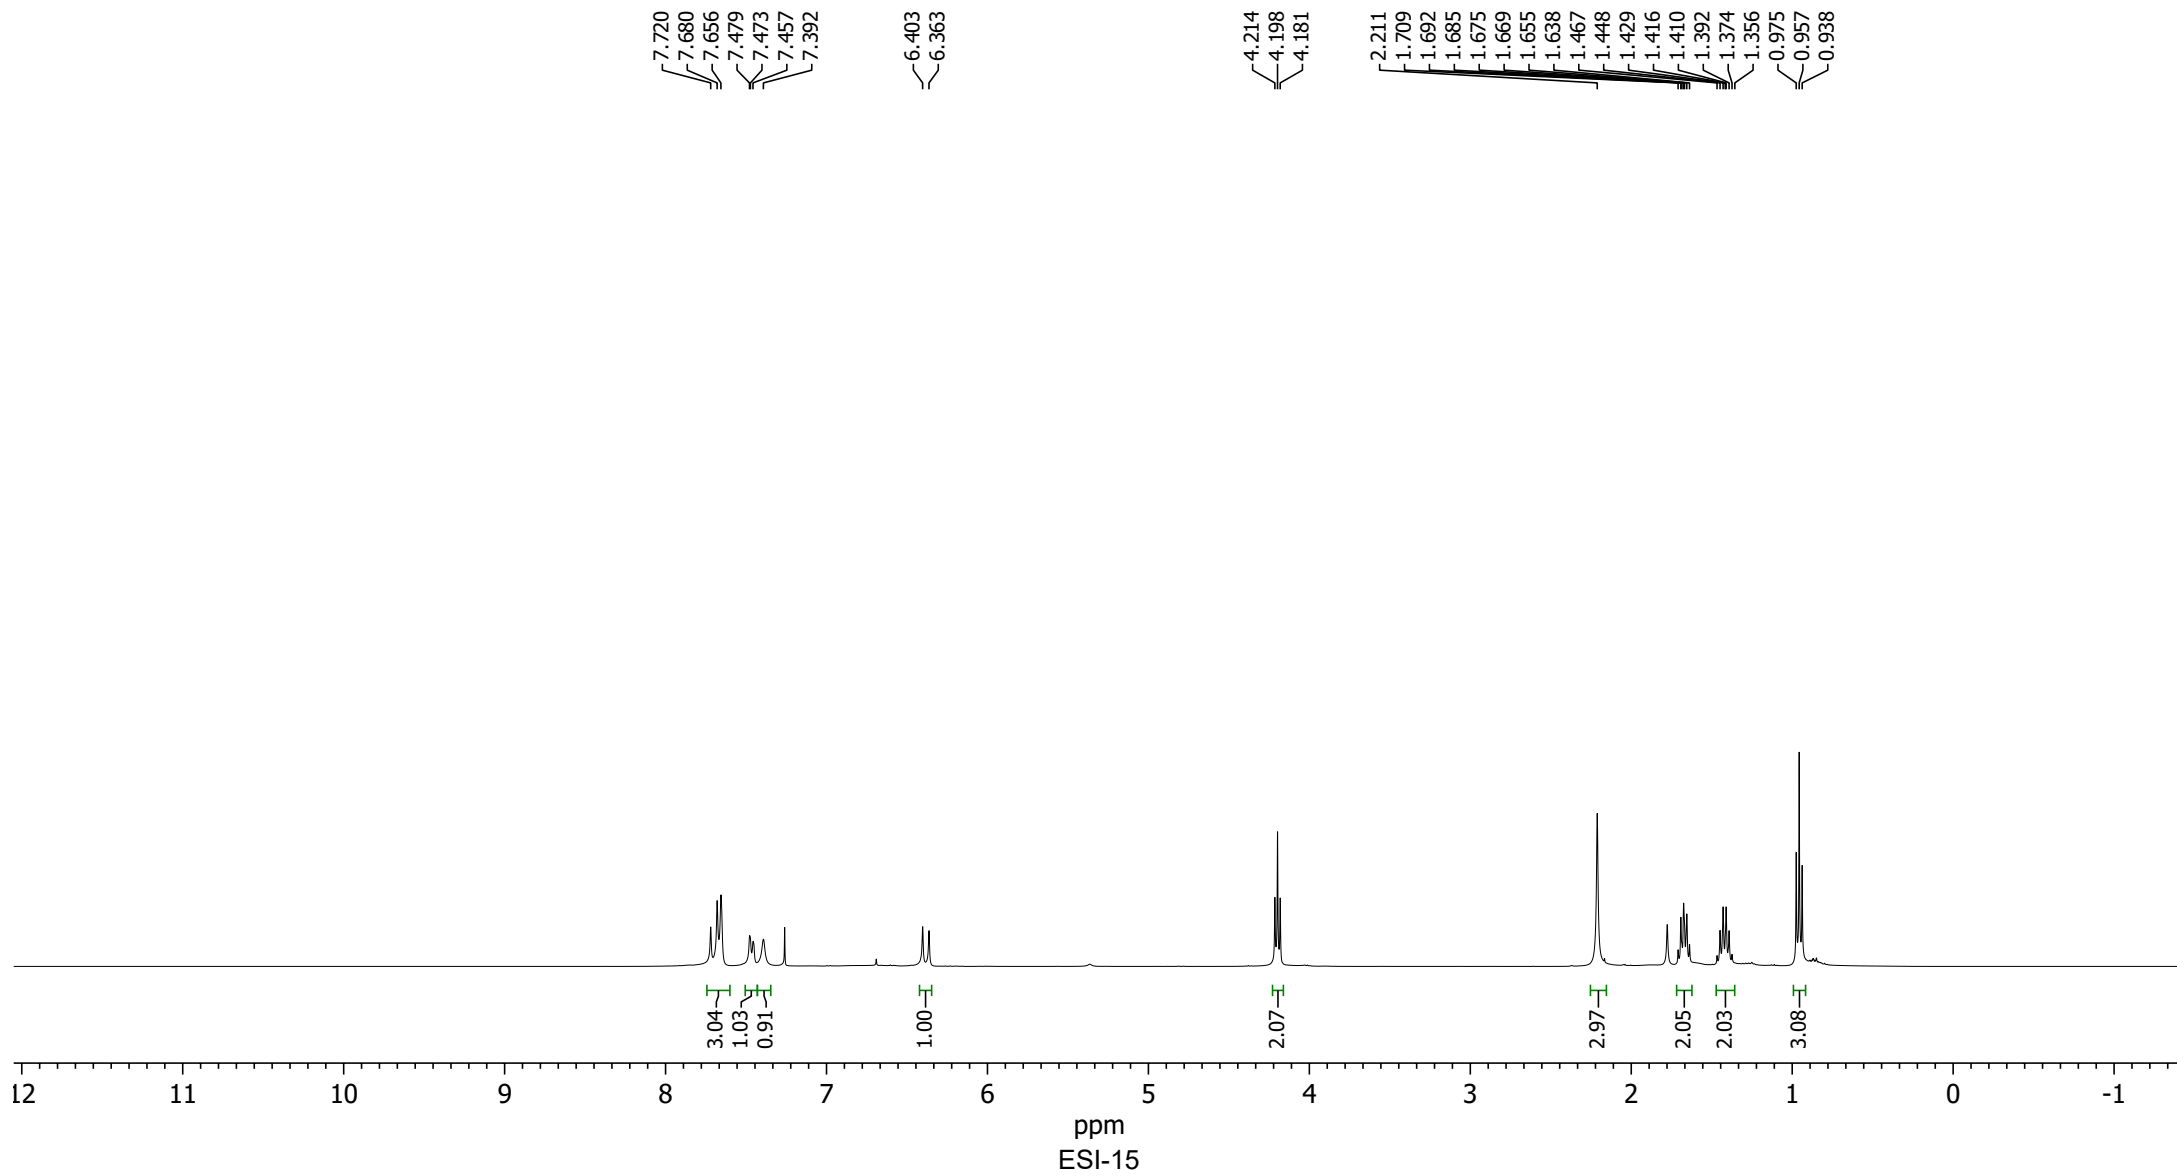

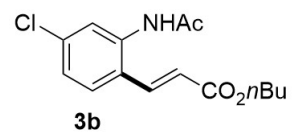

— 169.028  
— 166.728

— 137.878  
— 134.930  
— 133.627  
— 129.907  
— 129.343  
— 126.682  
— 122.125  
— 119.059

— 65.032

— 30.791

— 24.319

— 19.298

— 13.853

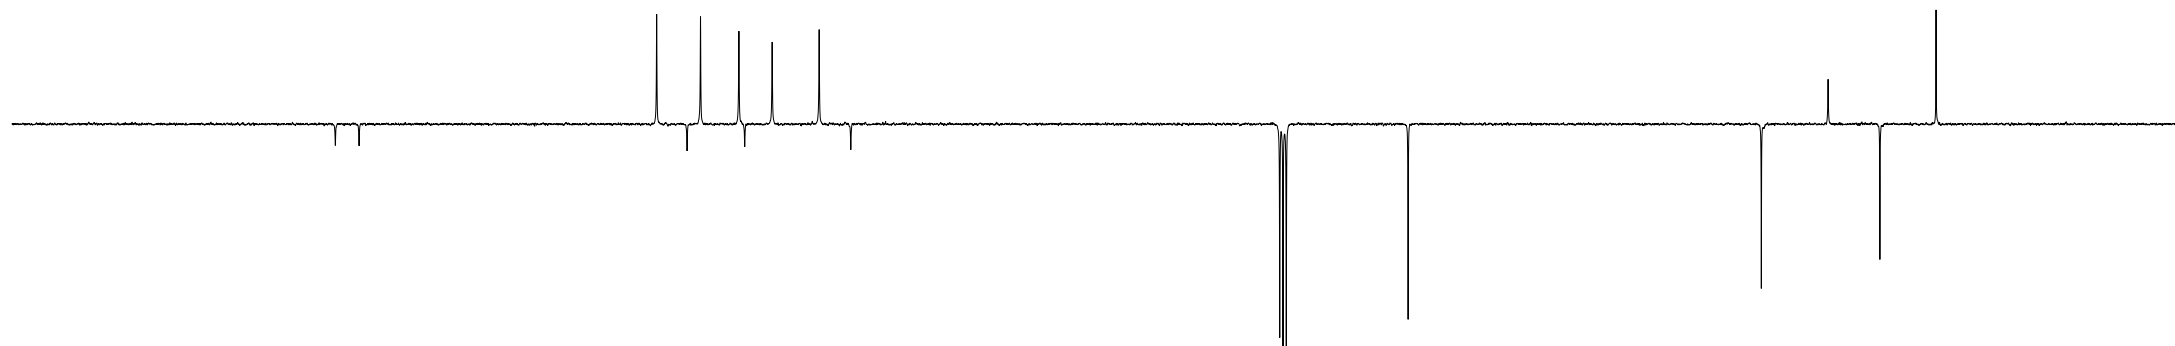

00 180 160 140 120 100 80 60 40 20 0

ppm  
ESI-16



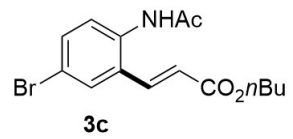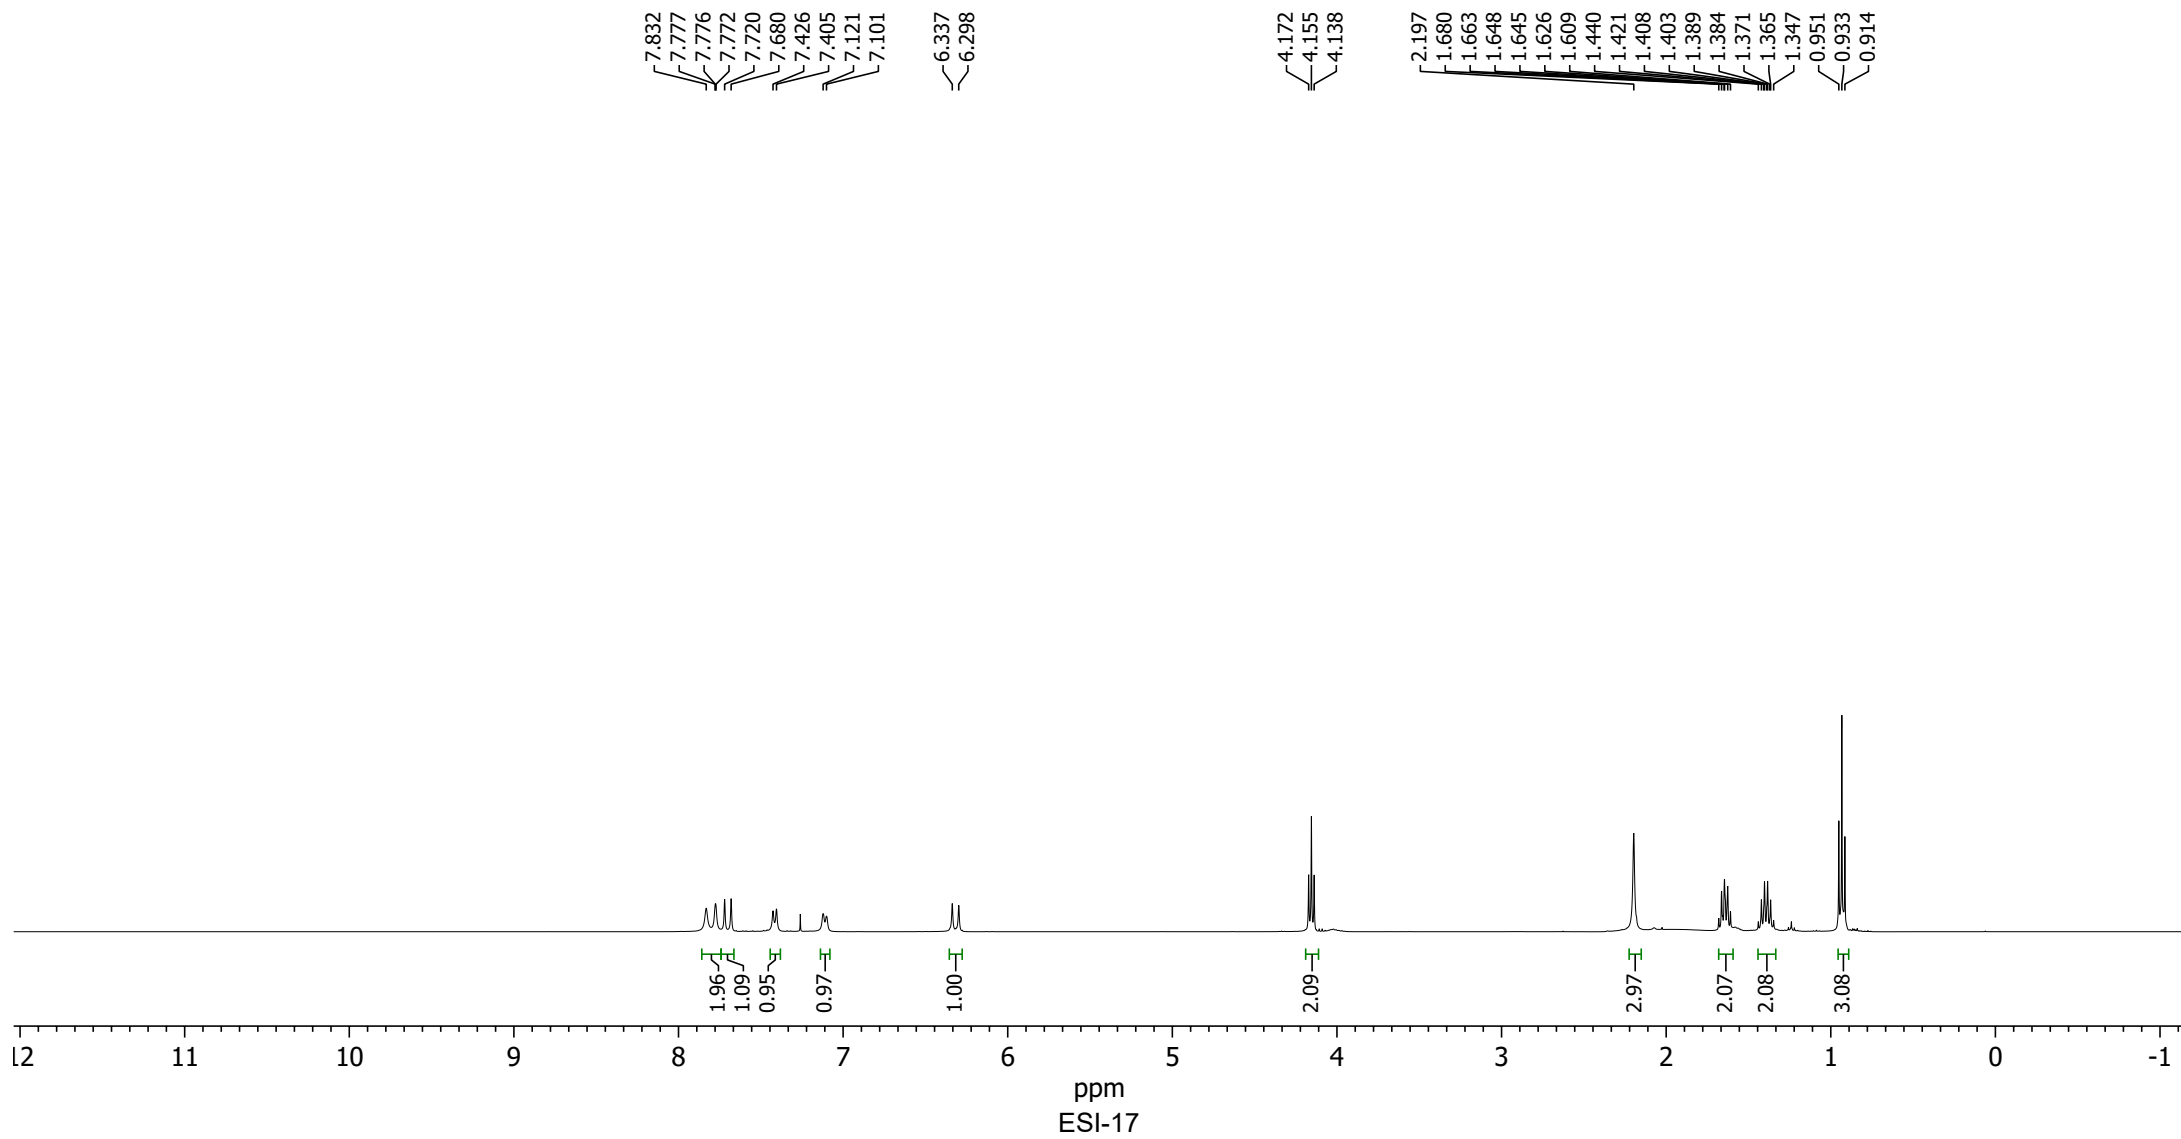

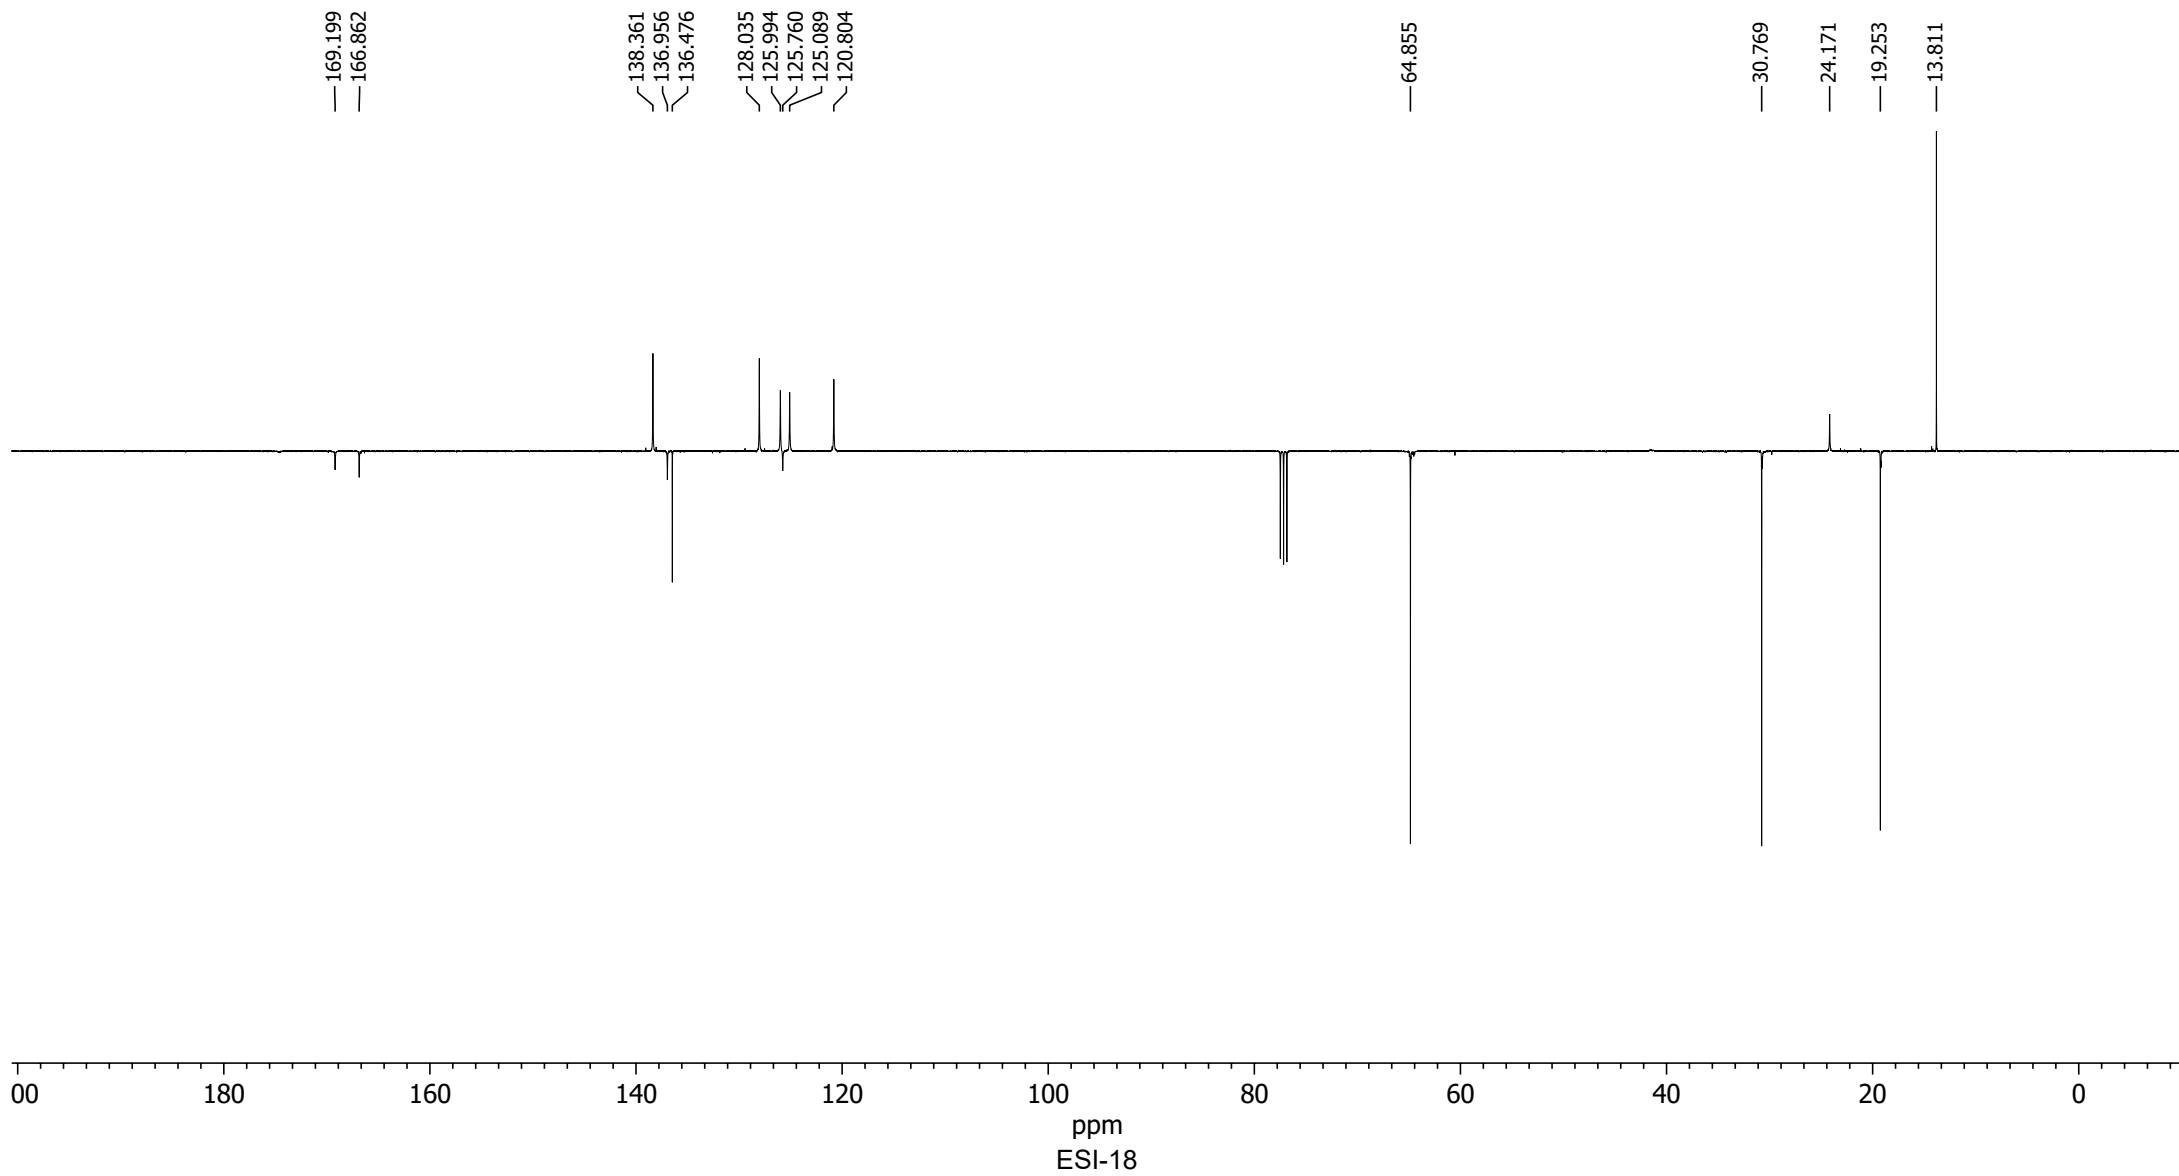

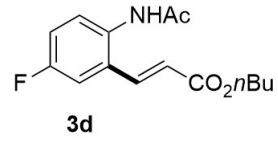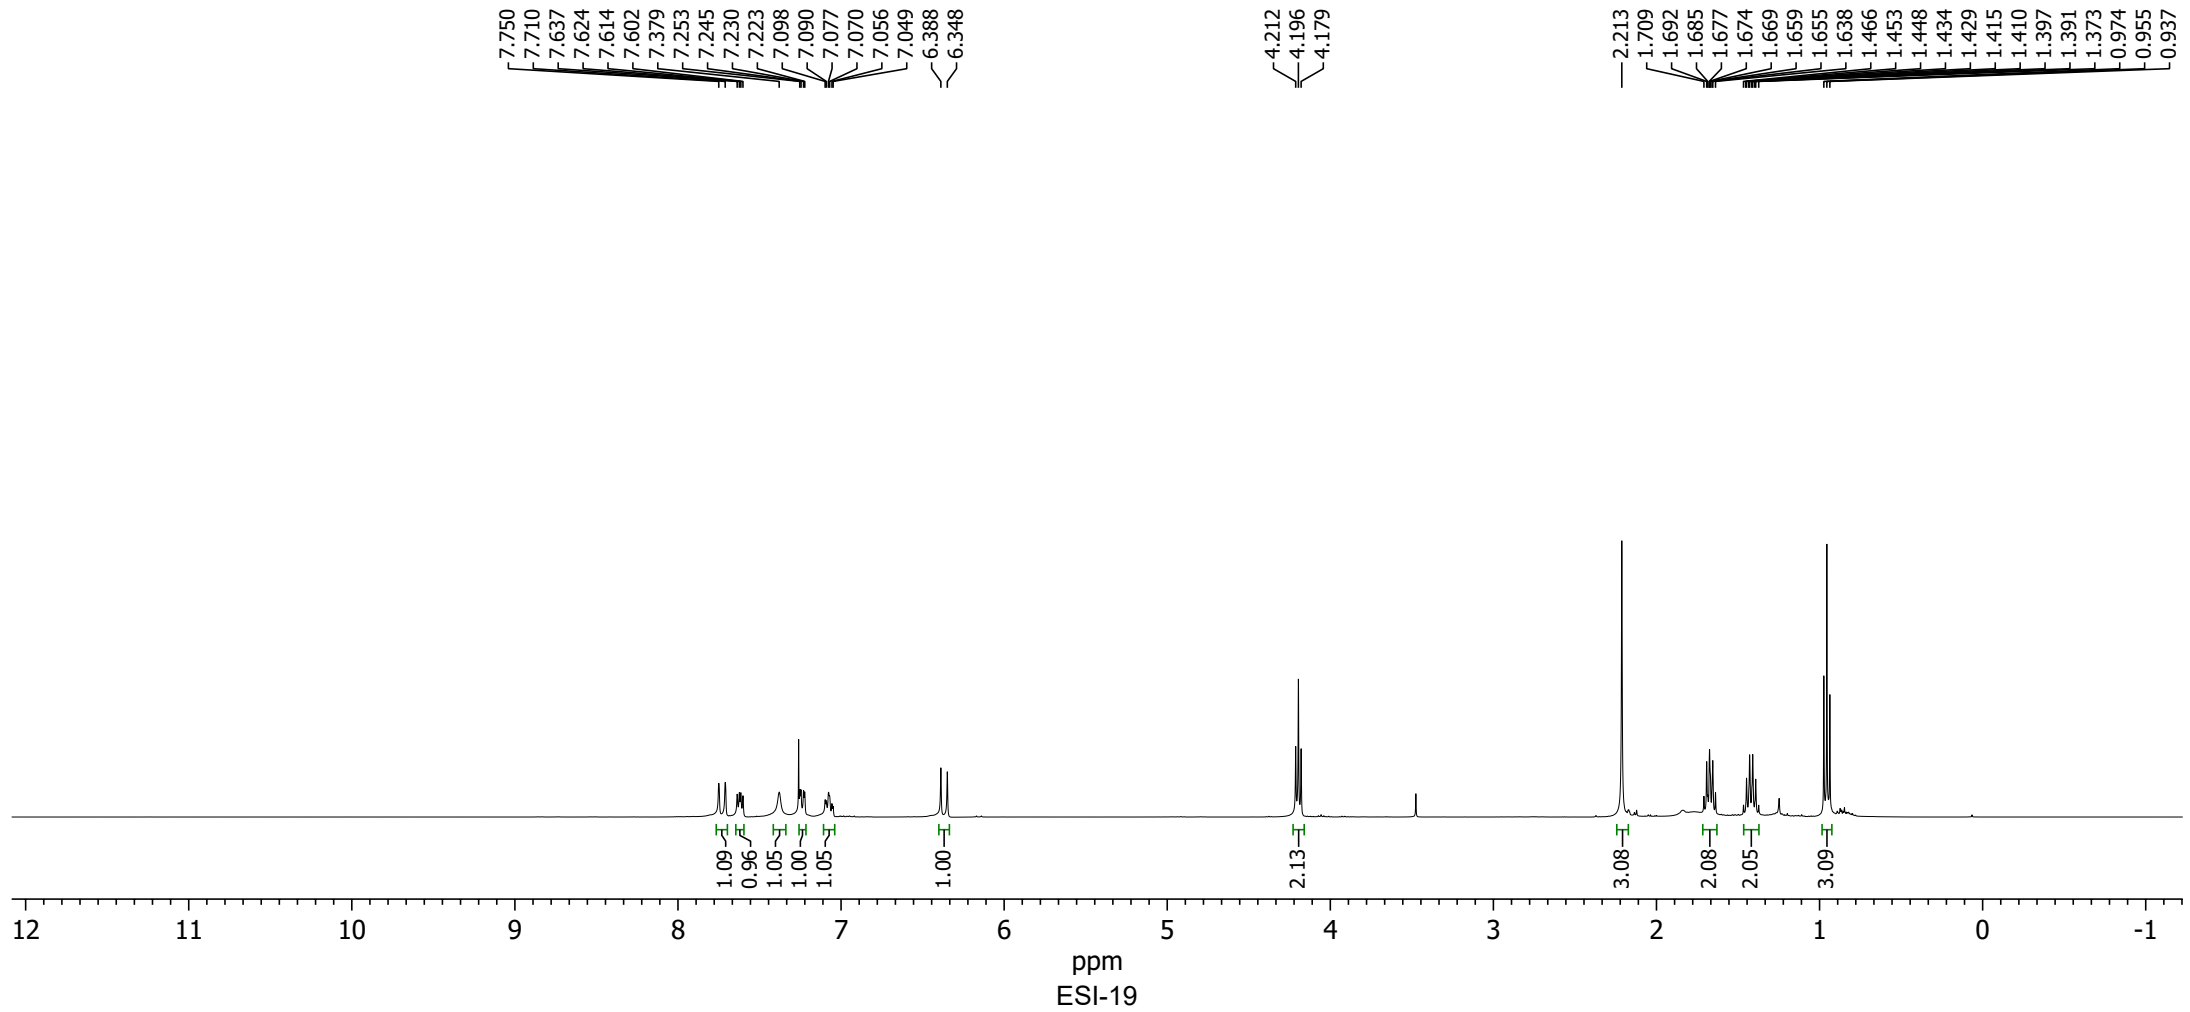

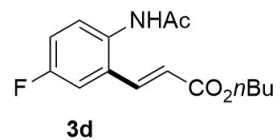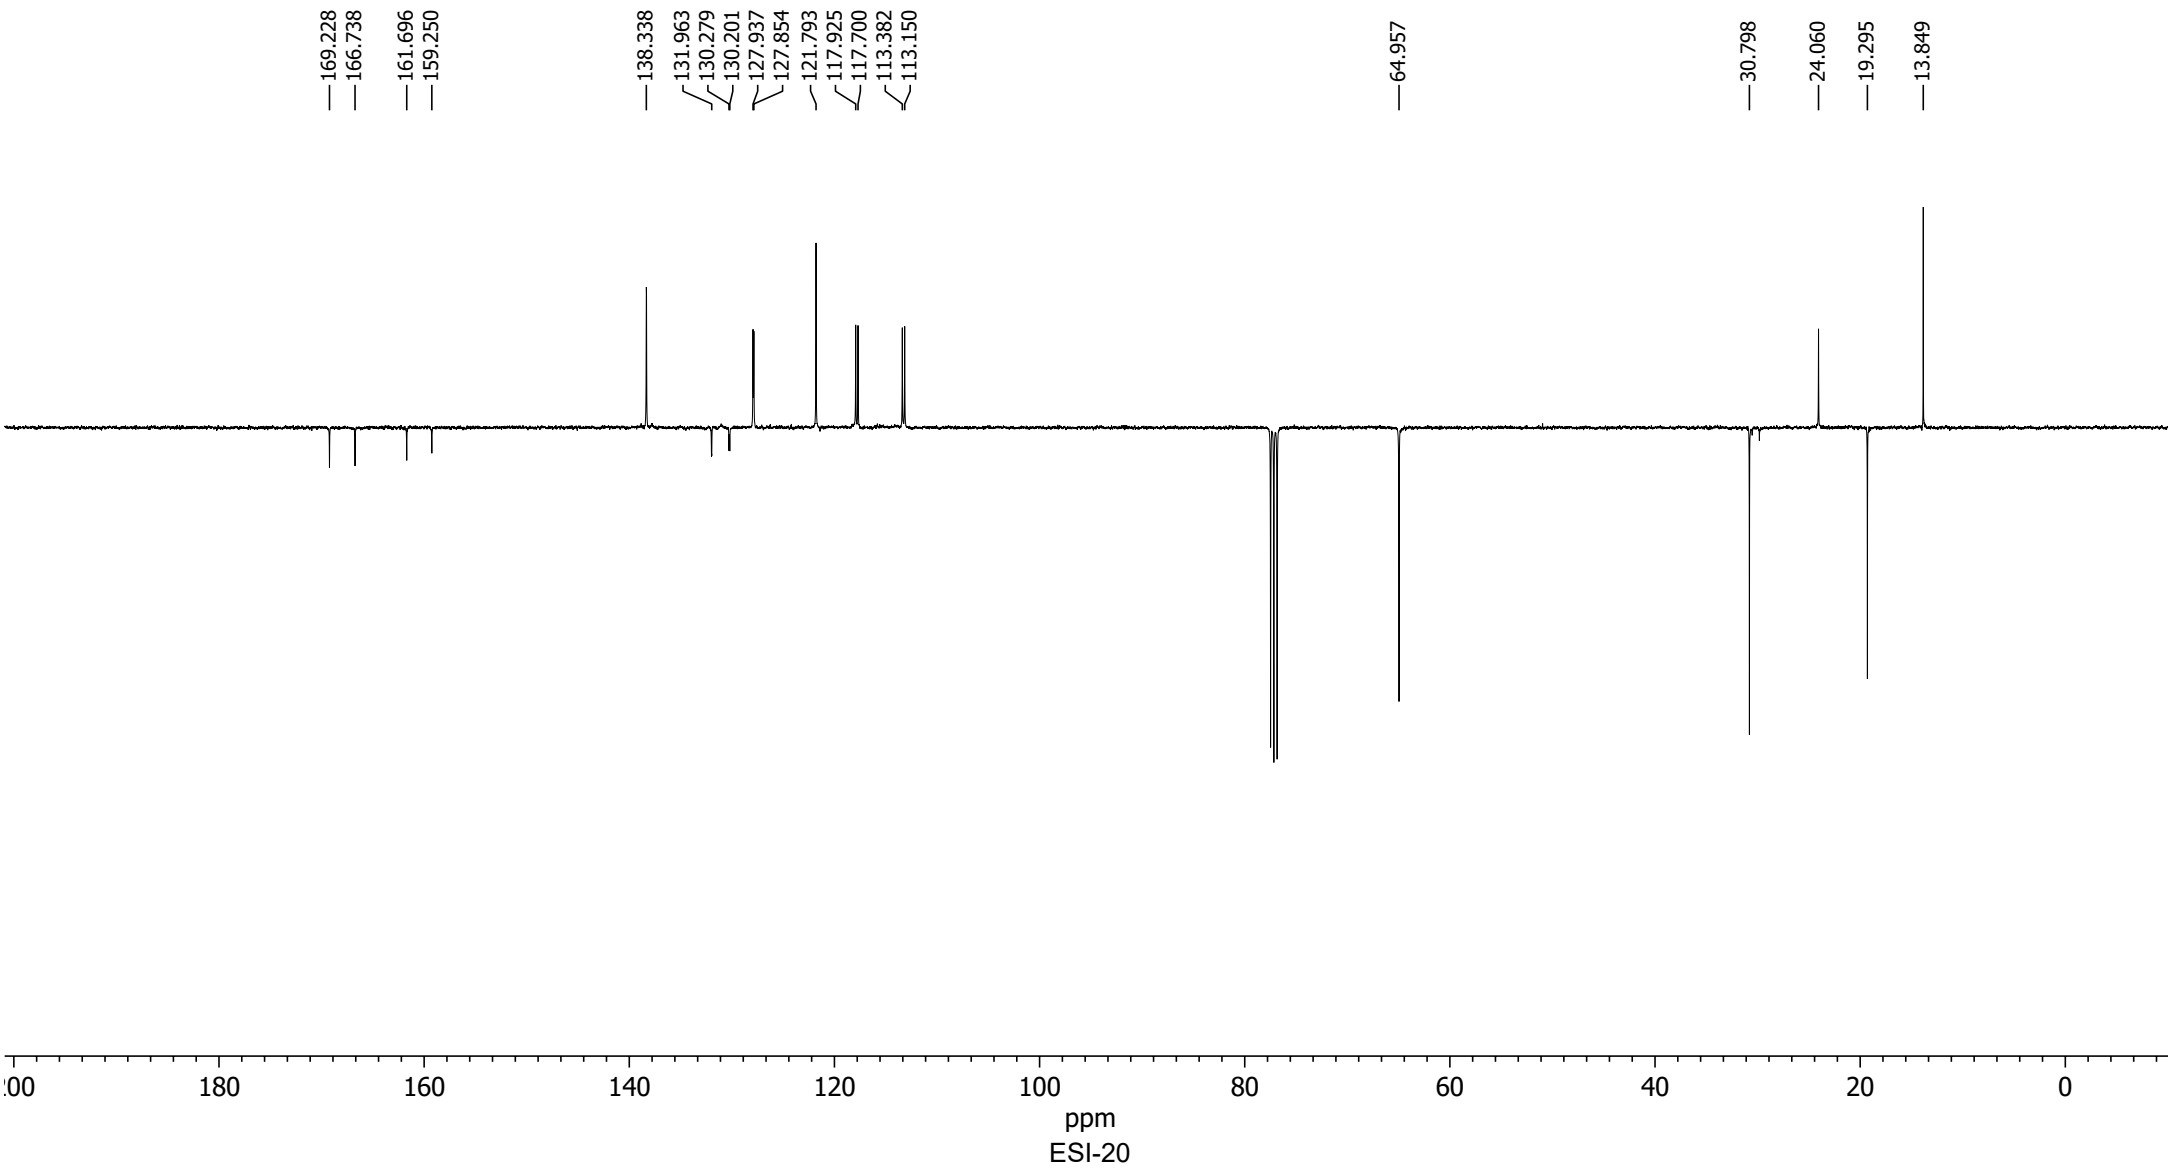

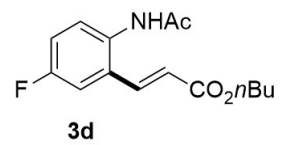

-115.378  
-115.399  
-115.417  
-115.437

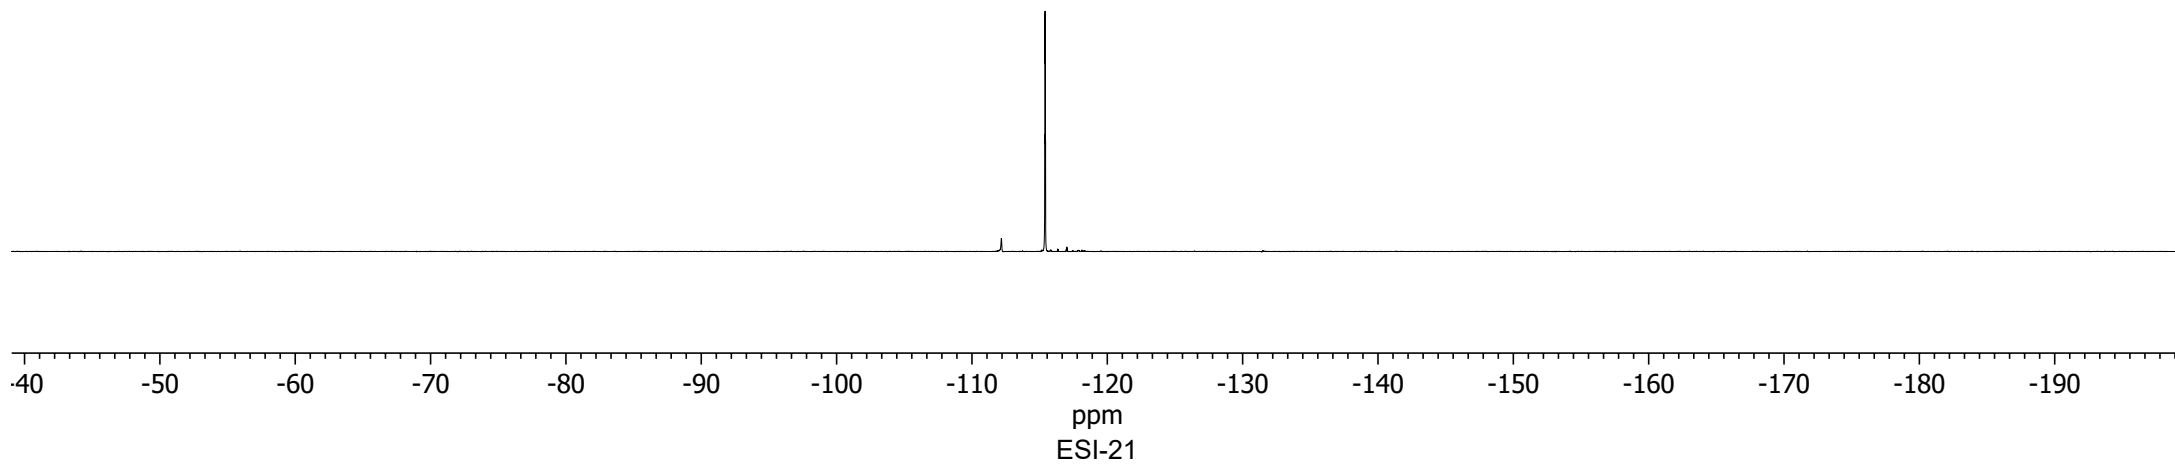

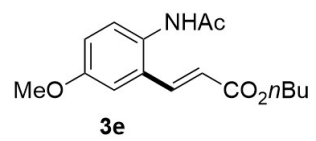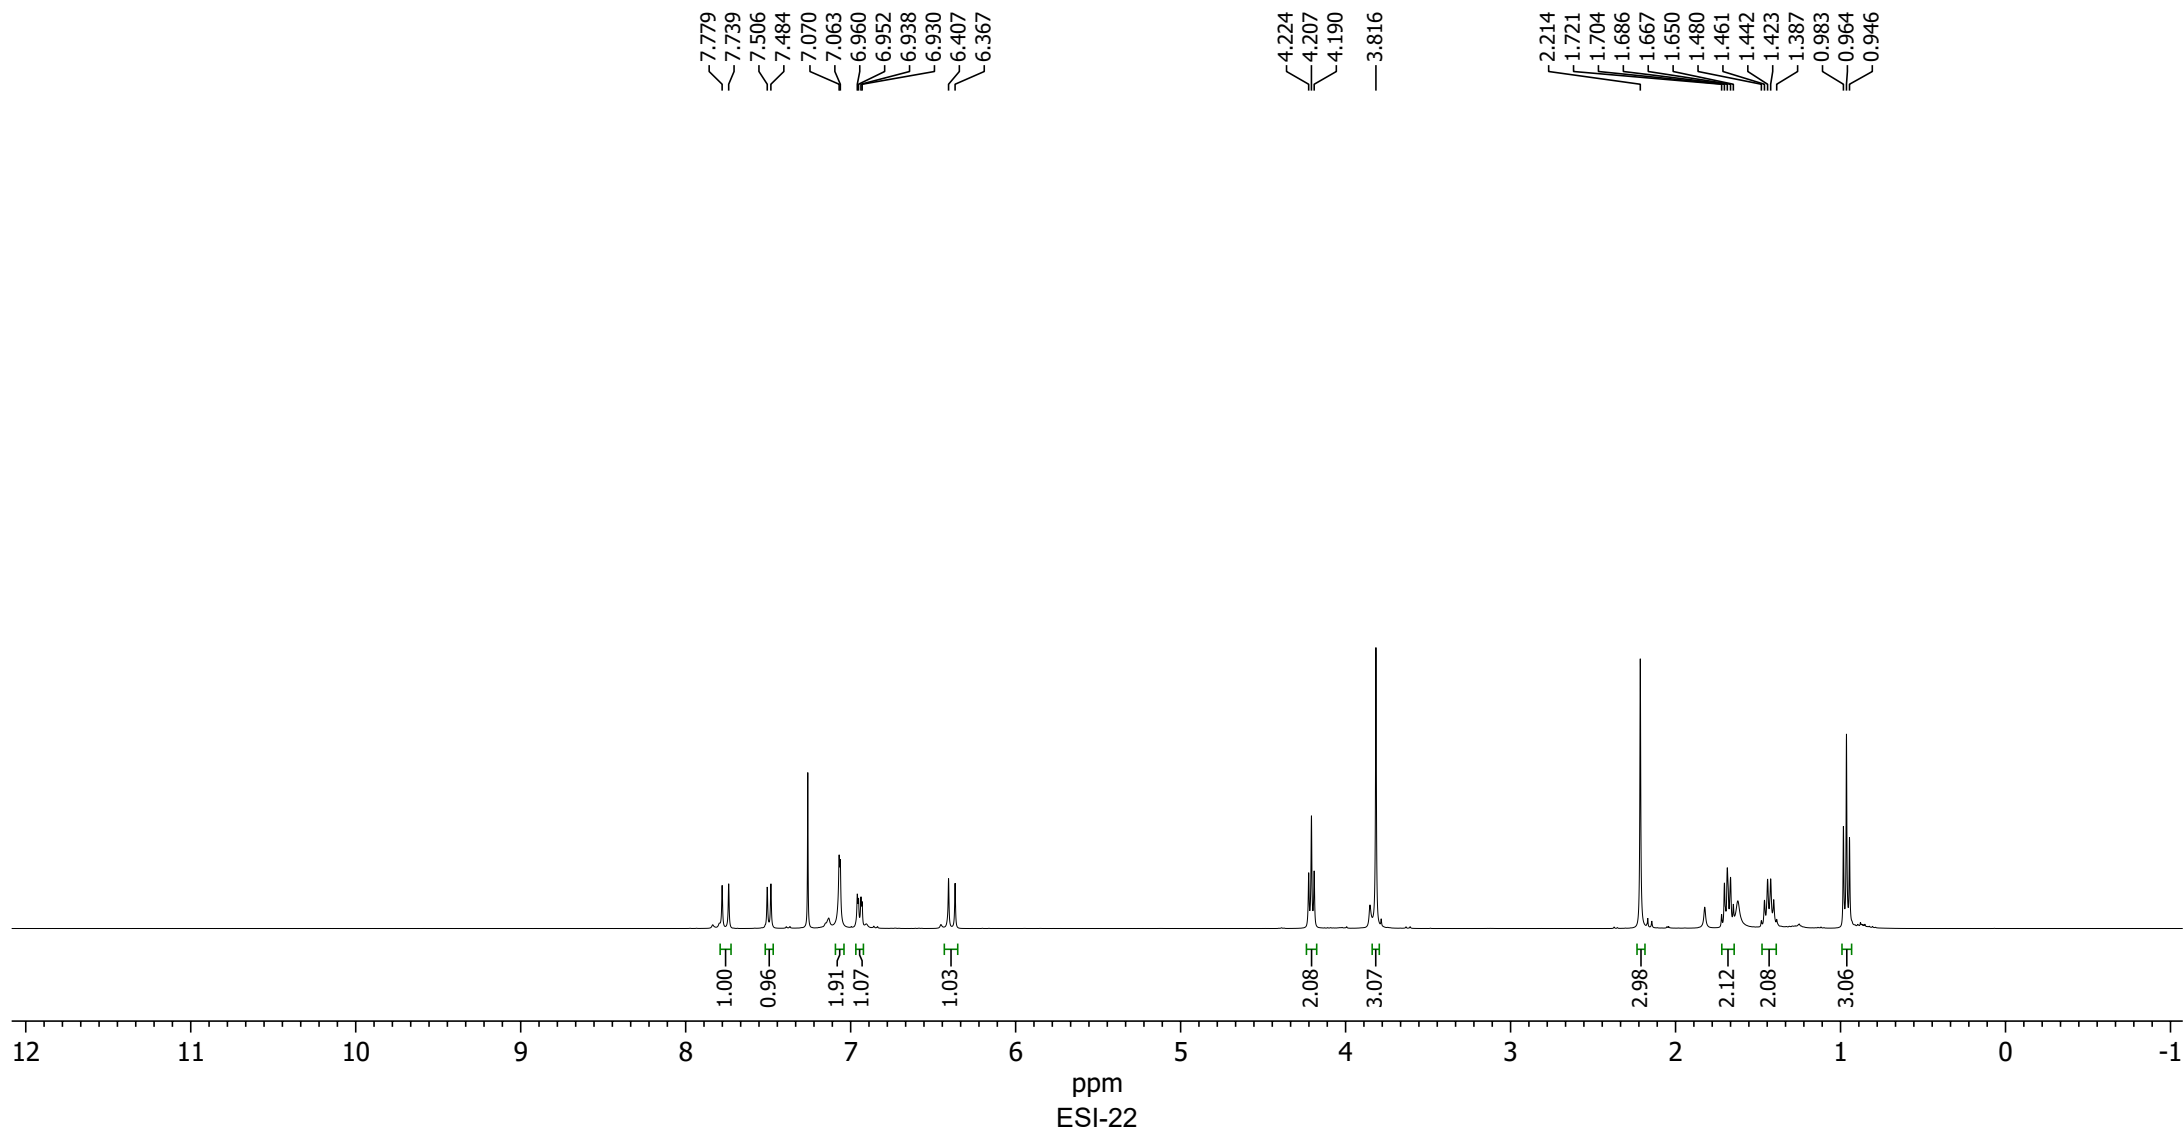

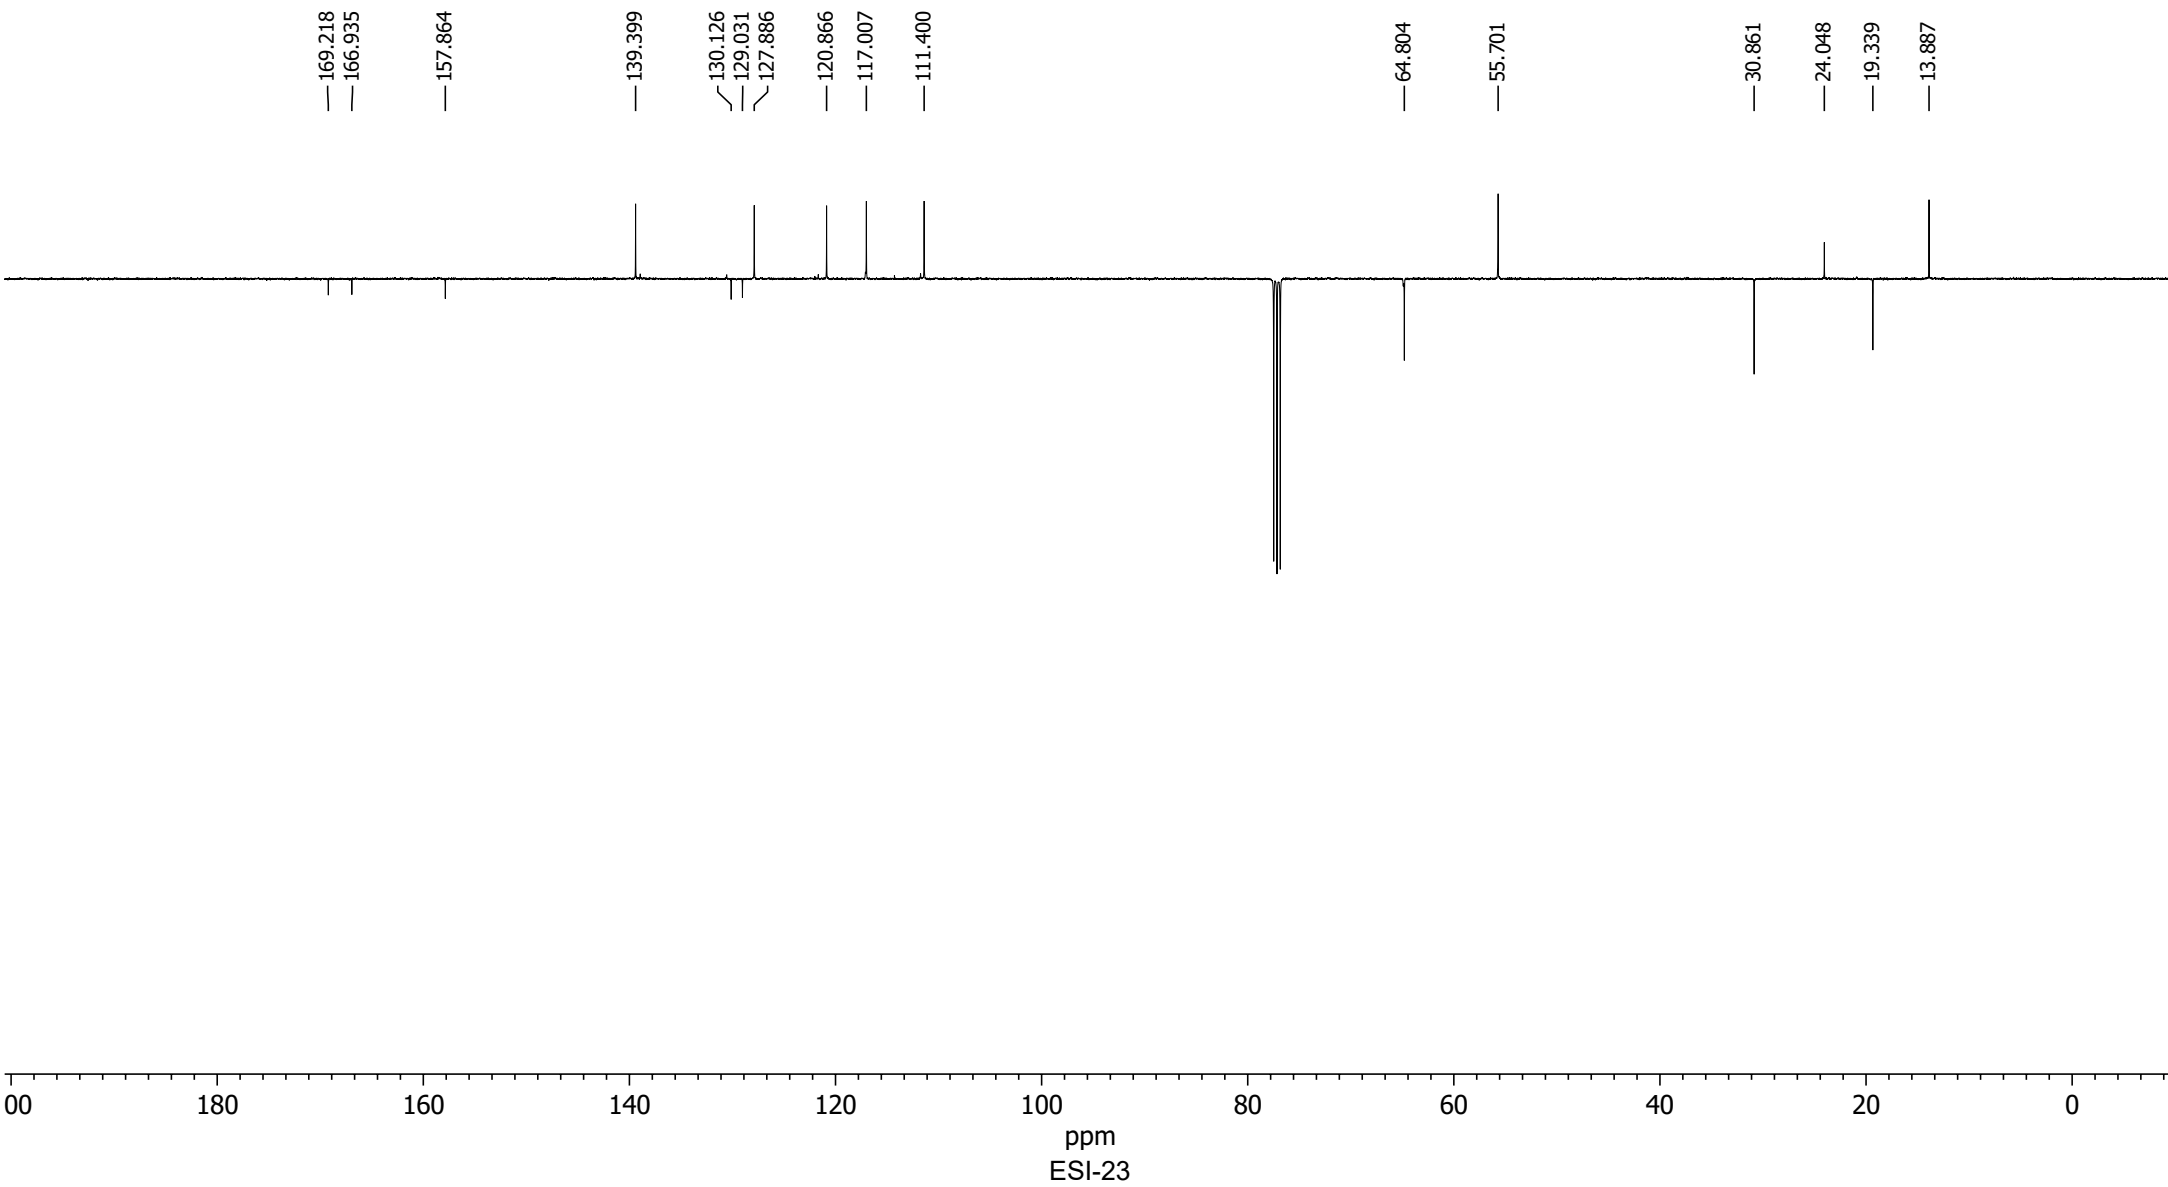

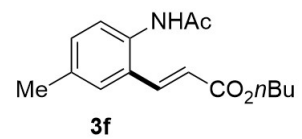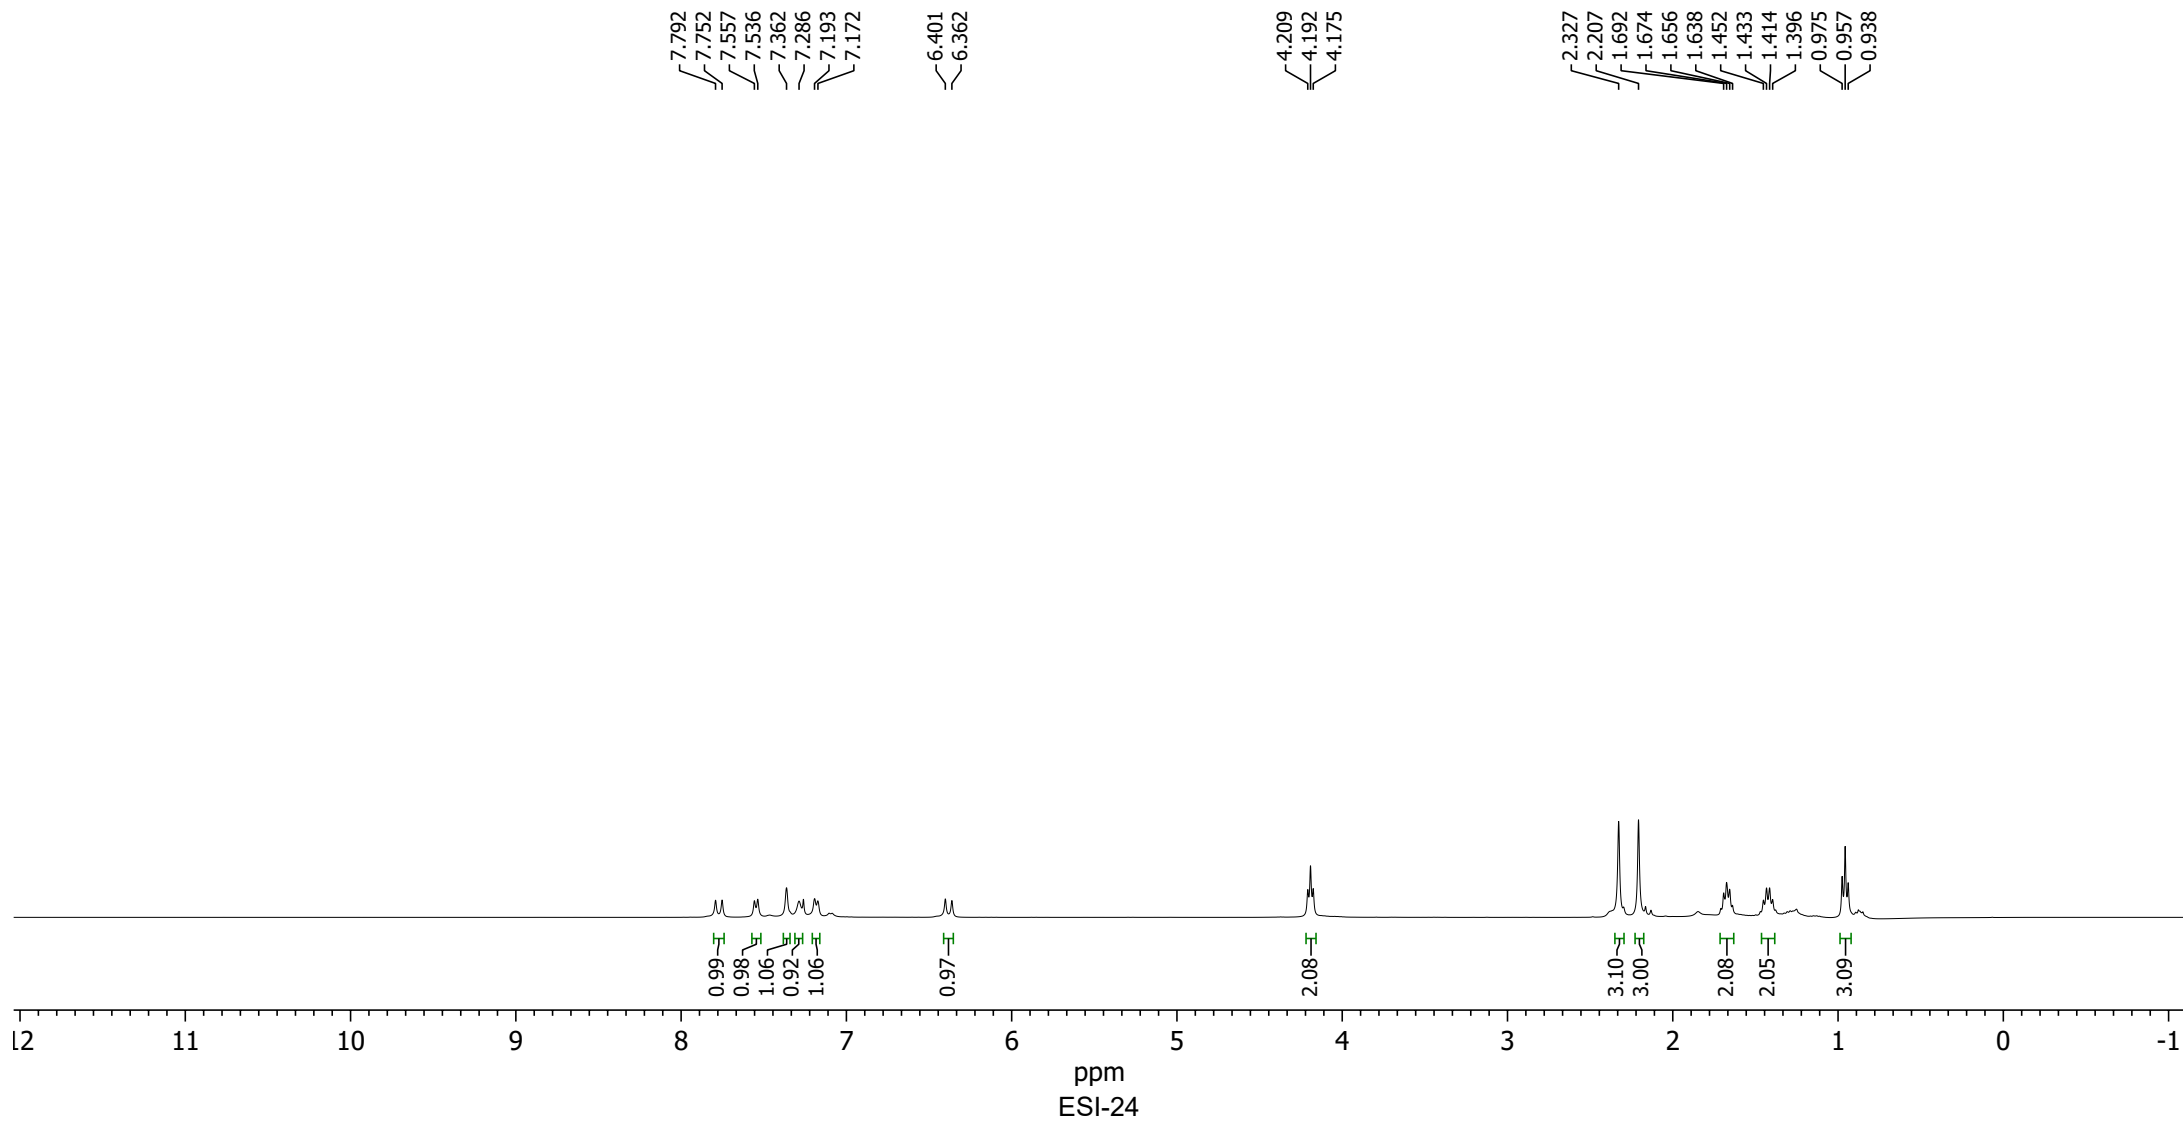



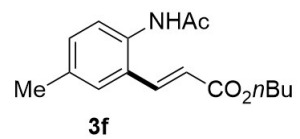

— 169.071  
— 167.088

— 139.497  
— 135.926  
— 133.458  
— 131.735  
— 127.962  
— 127.494  
— 125.694  
— 120.399

— 64.717

— 30.835  
— 24.178  
— 21.069  
— 19.307  
— 13.855

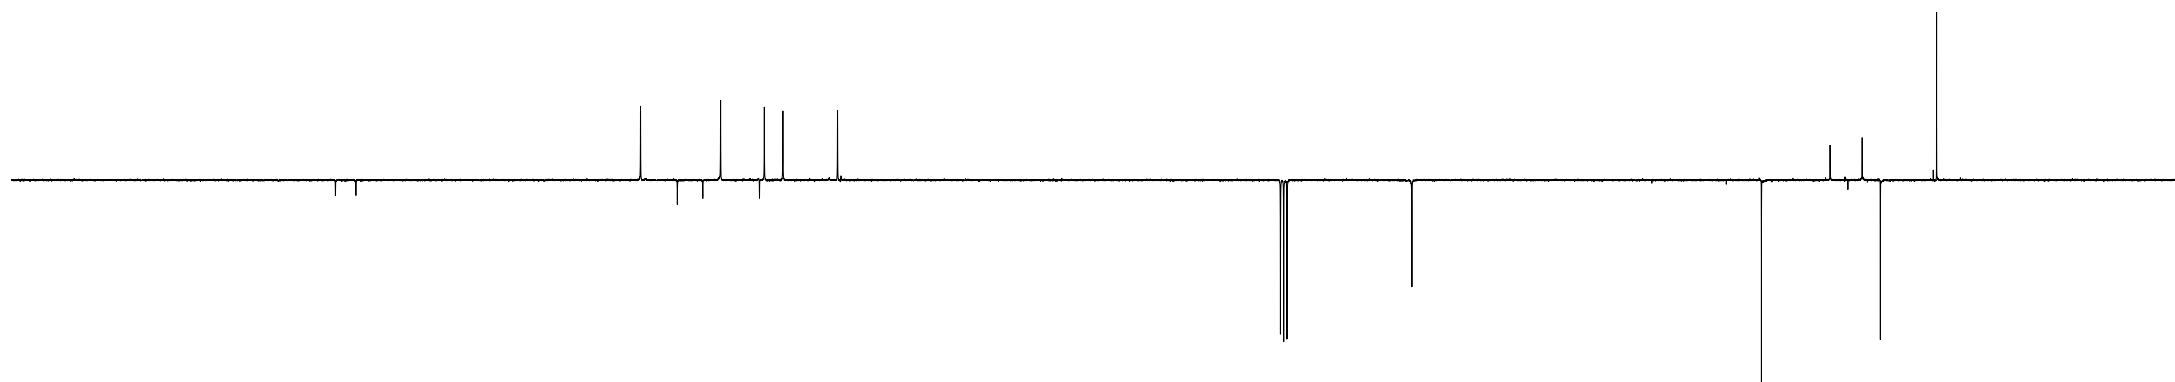

00 180 160 140 120 100 80 60 40 20 0  
ppm  
ESI-25

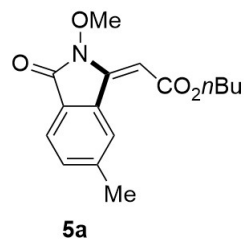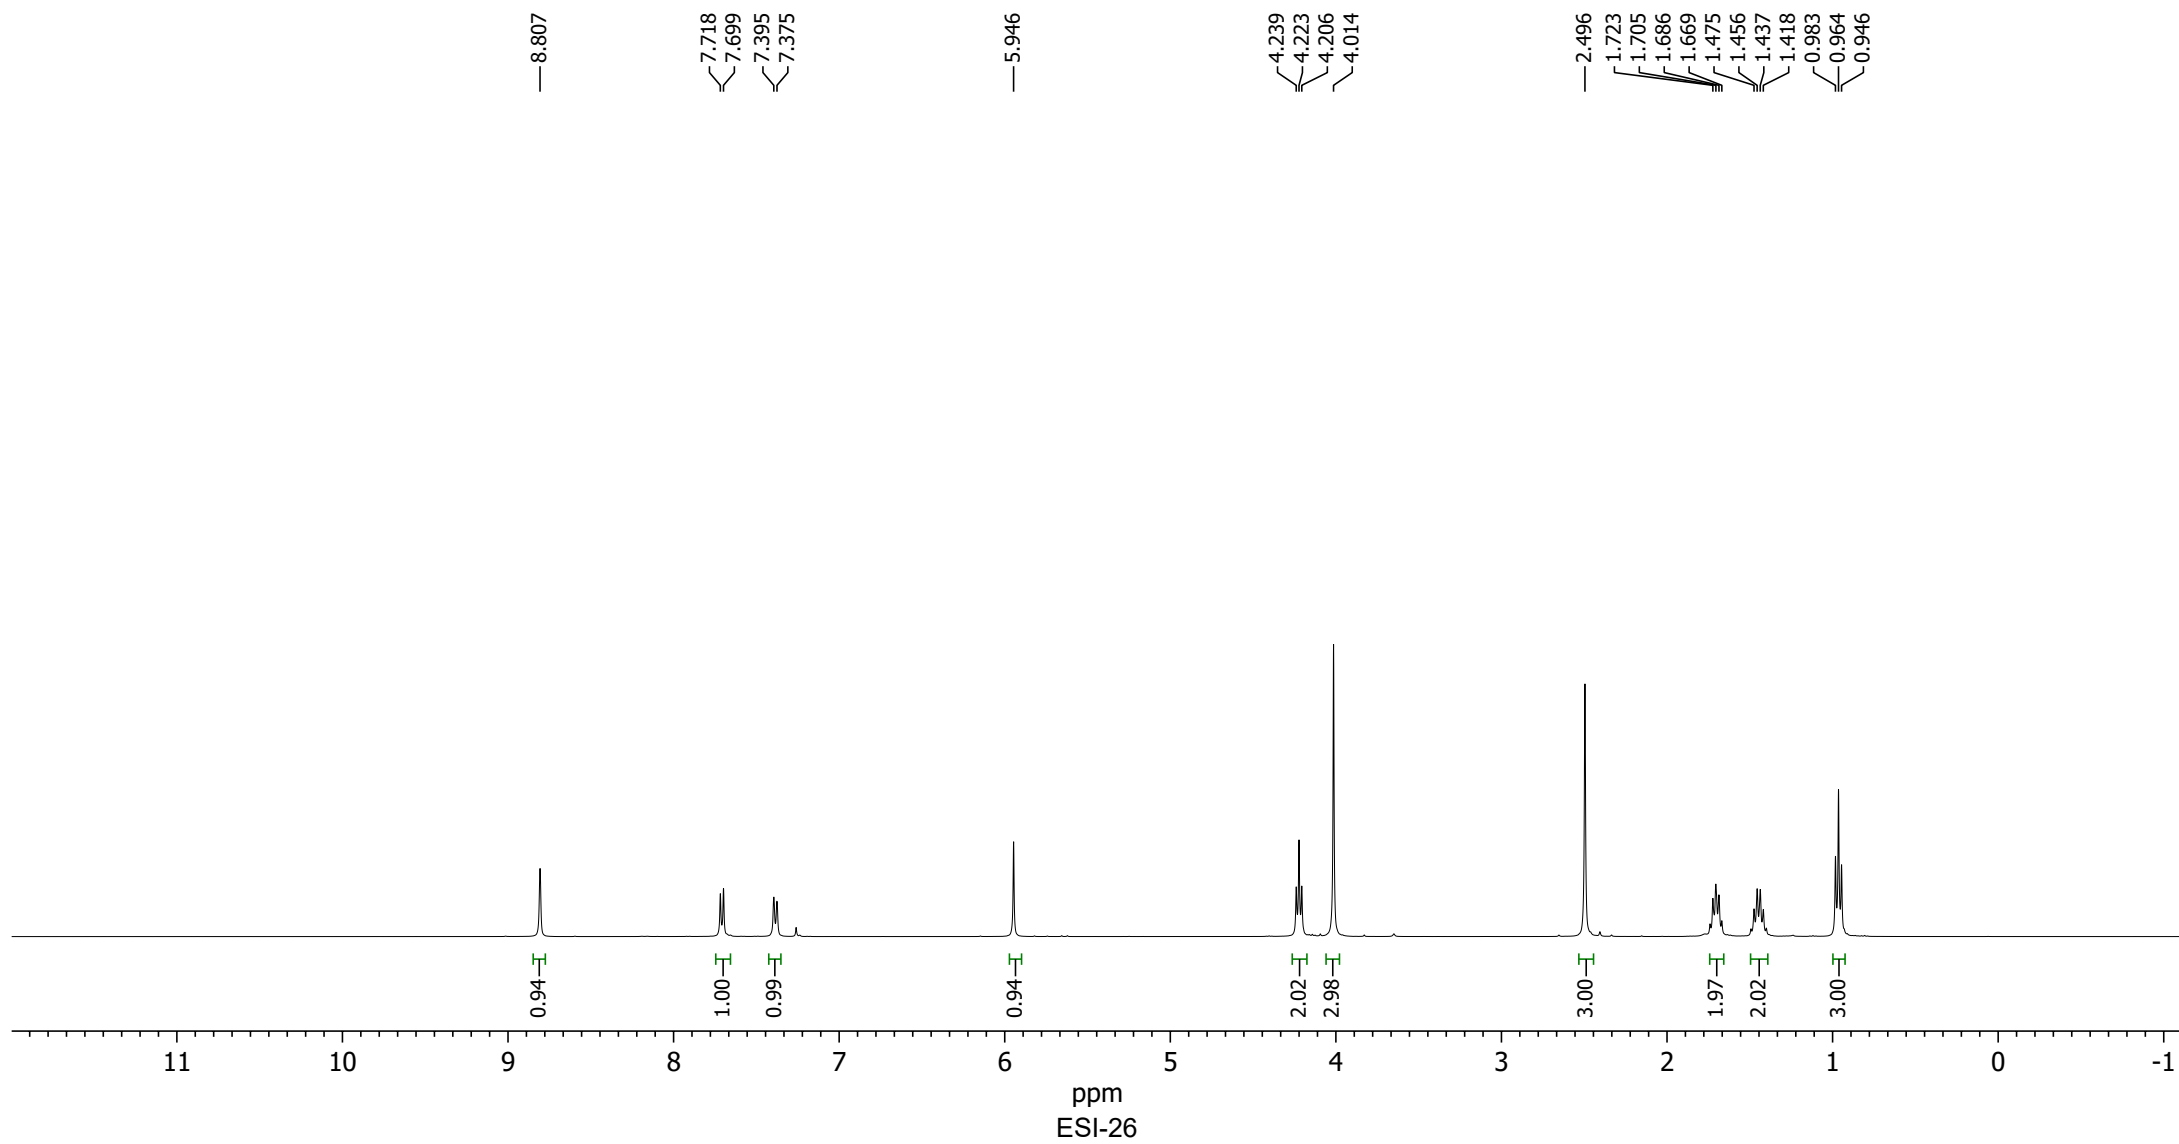

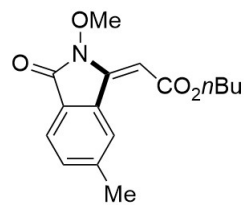

**5a**

— 166.173  
— 161.940

— 144.688  
— 144.113

— 132.332  
— 130.528  
— 128.766  
— 124.871  
— 123.285

— 97.500

— 64.673  
— 64.416

— 30.857

— 22.481  
— 19.319

— 13.853

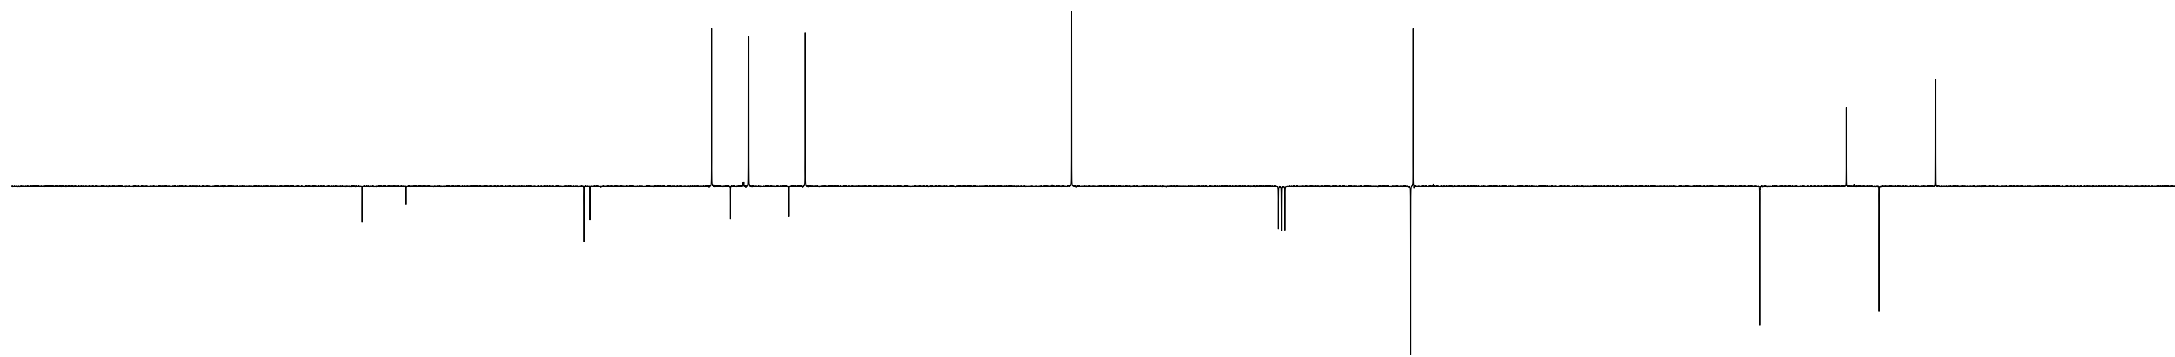

200 180 160 140 120 100 80 60 40 20 0

ppm  
ESI-27

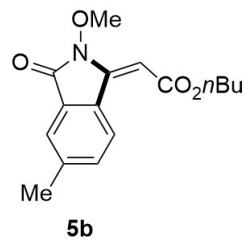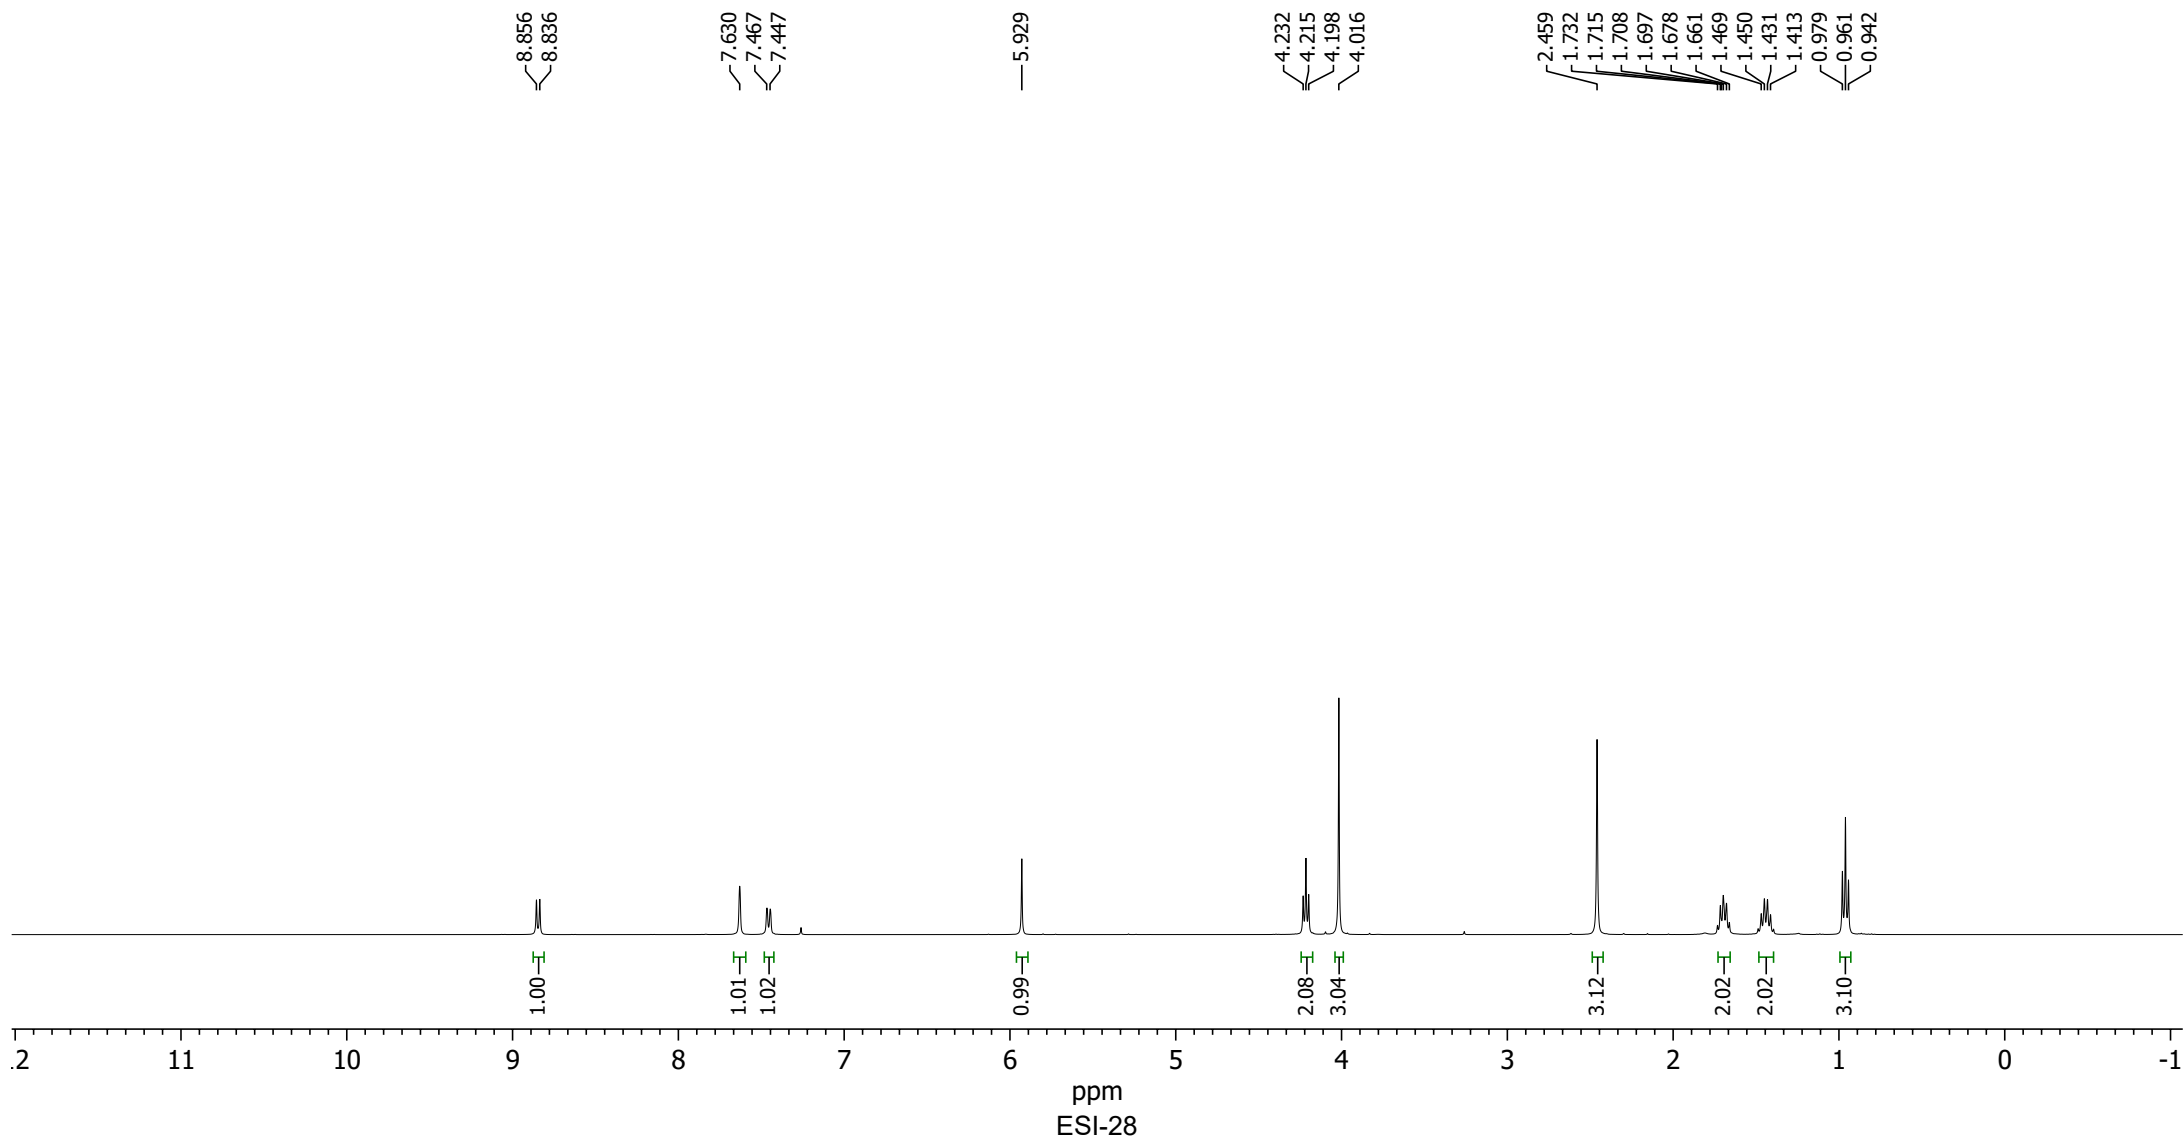

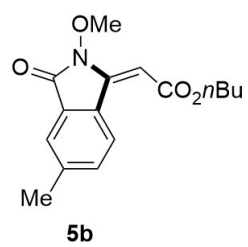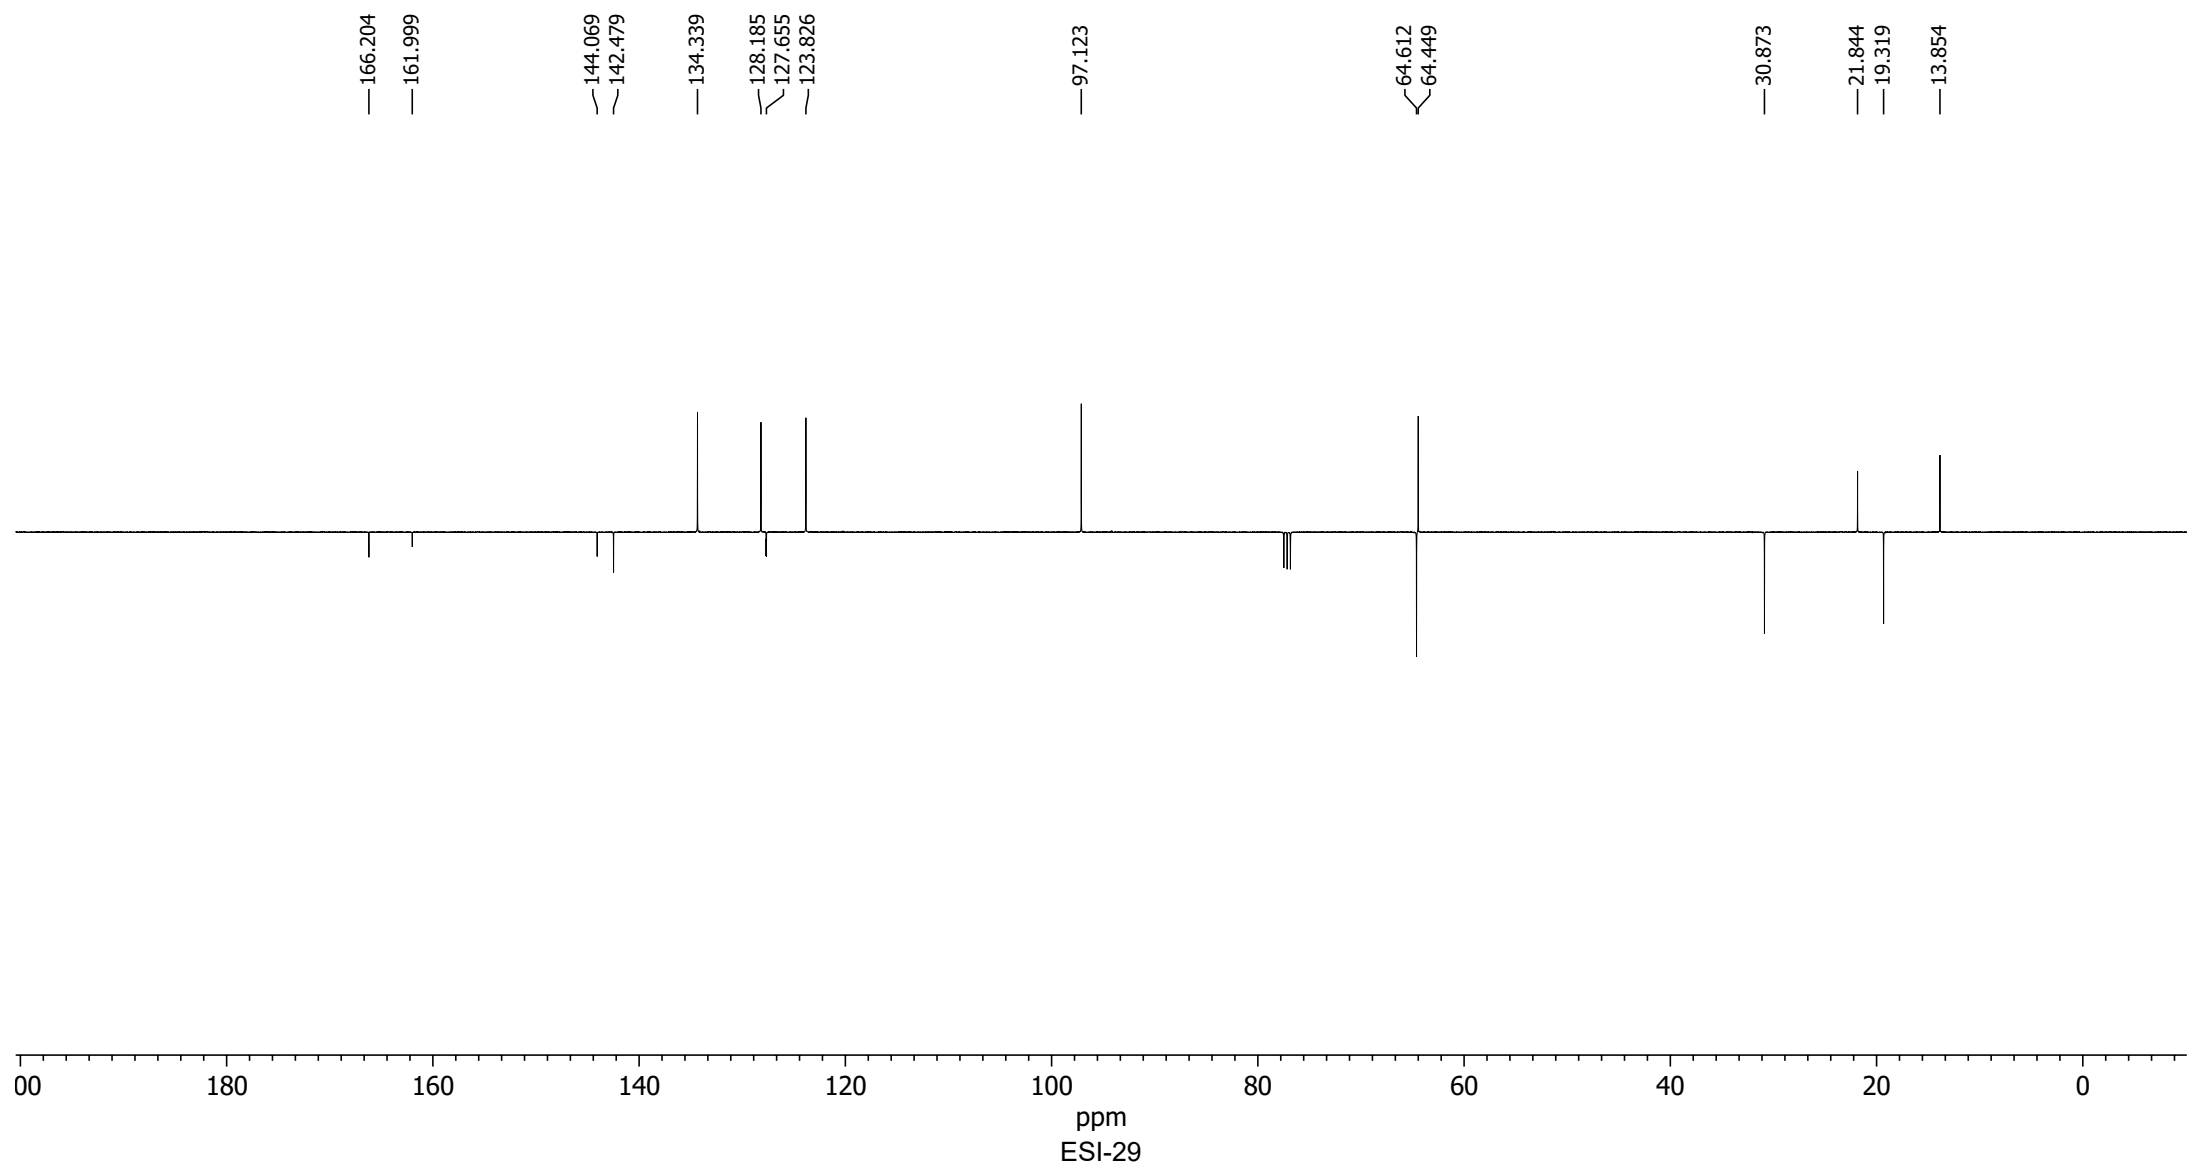

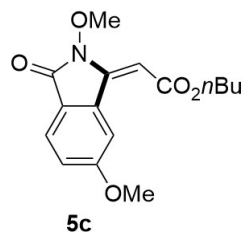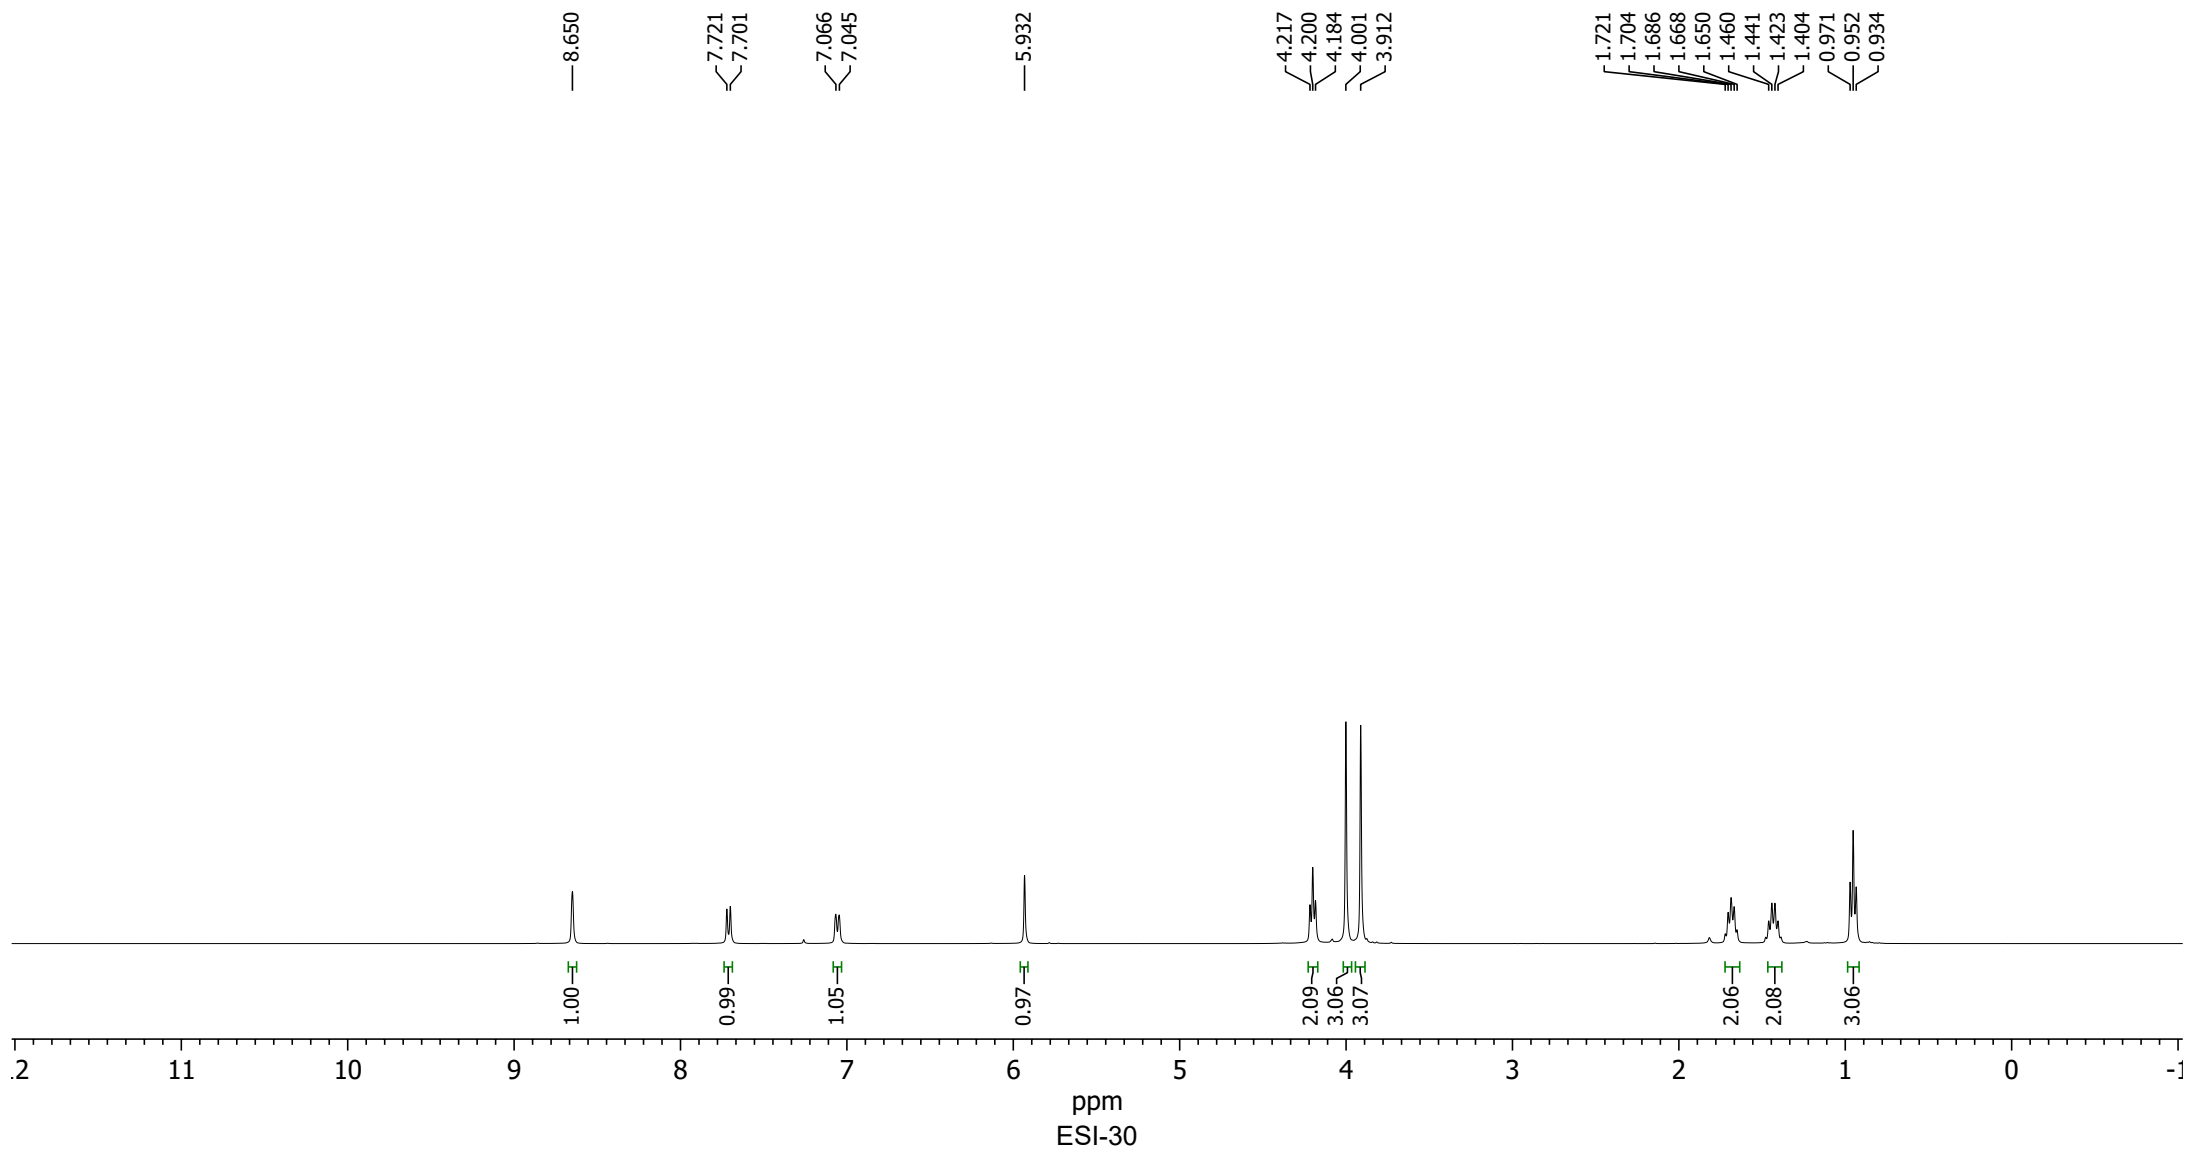



—166.141  
—164.357  
—161.898

—144.129

—132.462

—124.872

—119.599

—118.103

—113.100

—97.536

64.632  
64.402

—55.942

—30.837

—19.290

—13.834

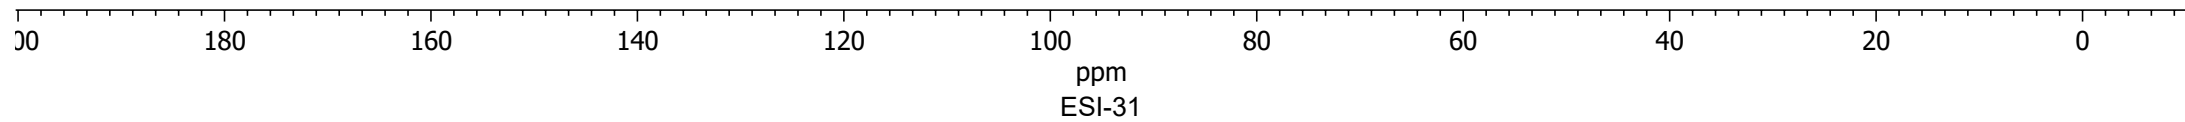

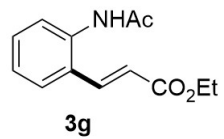

7.816  
7.809  
7.777  
7.769  
7.720  
7.699  
7.679  
7.662  
7.642  
7.579  
7.536  
7.525  
7.522  
7.519  
7.515  
7.504  
7.373  
7.369  
7.353  
7.334  
7.316  
7.193  
7.176  
7.160  
7.143  
6.385  
6.368  
6.345  
6.329

4.262  
4.249  
4.244  
4.231  
4.226  
4.213  
4.208

2.201  
2.183

1.331  
1.321  
1.313  
1.303  
1.295  
1.285

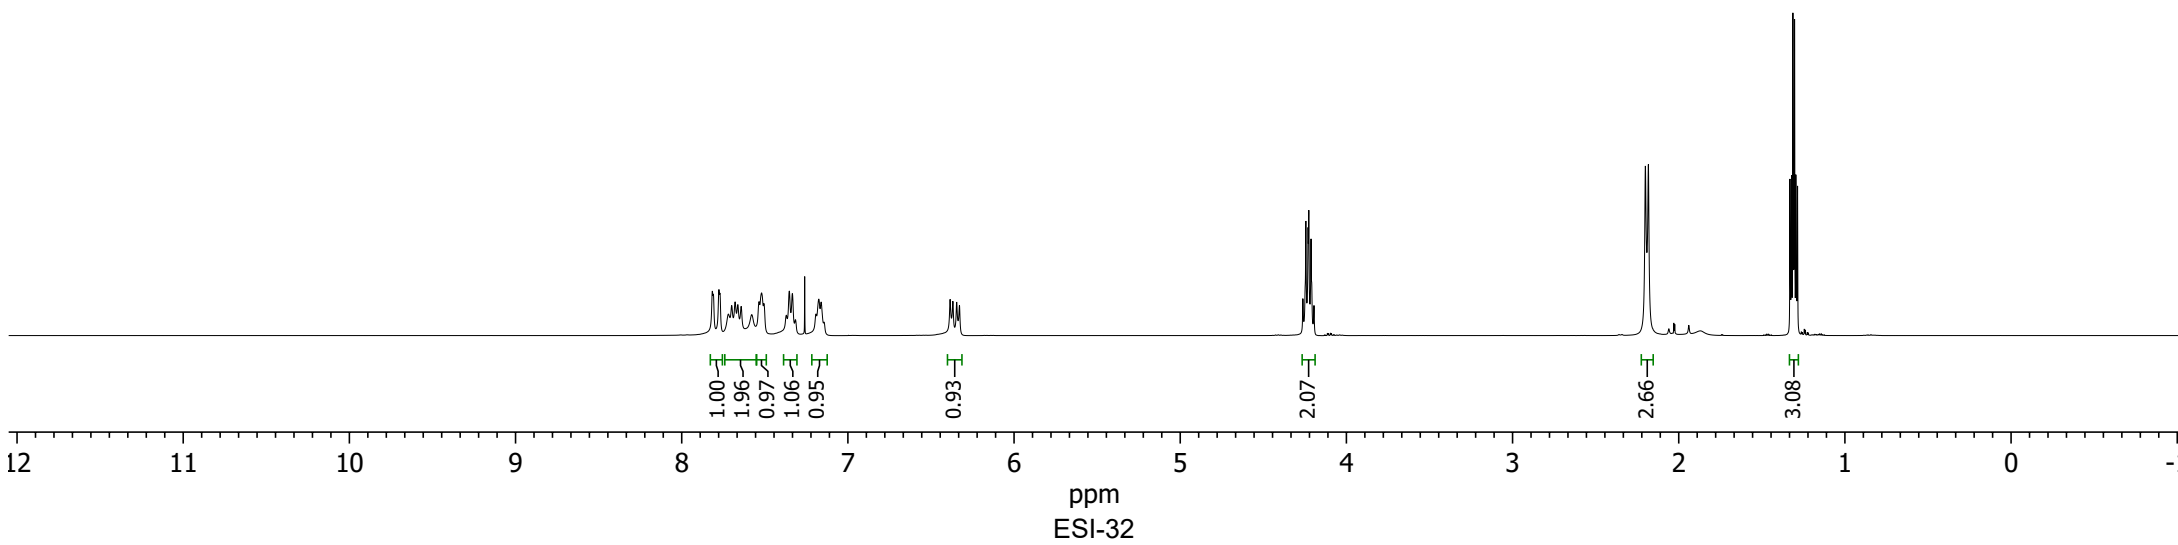



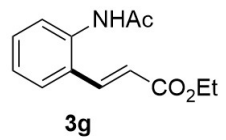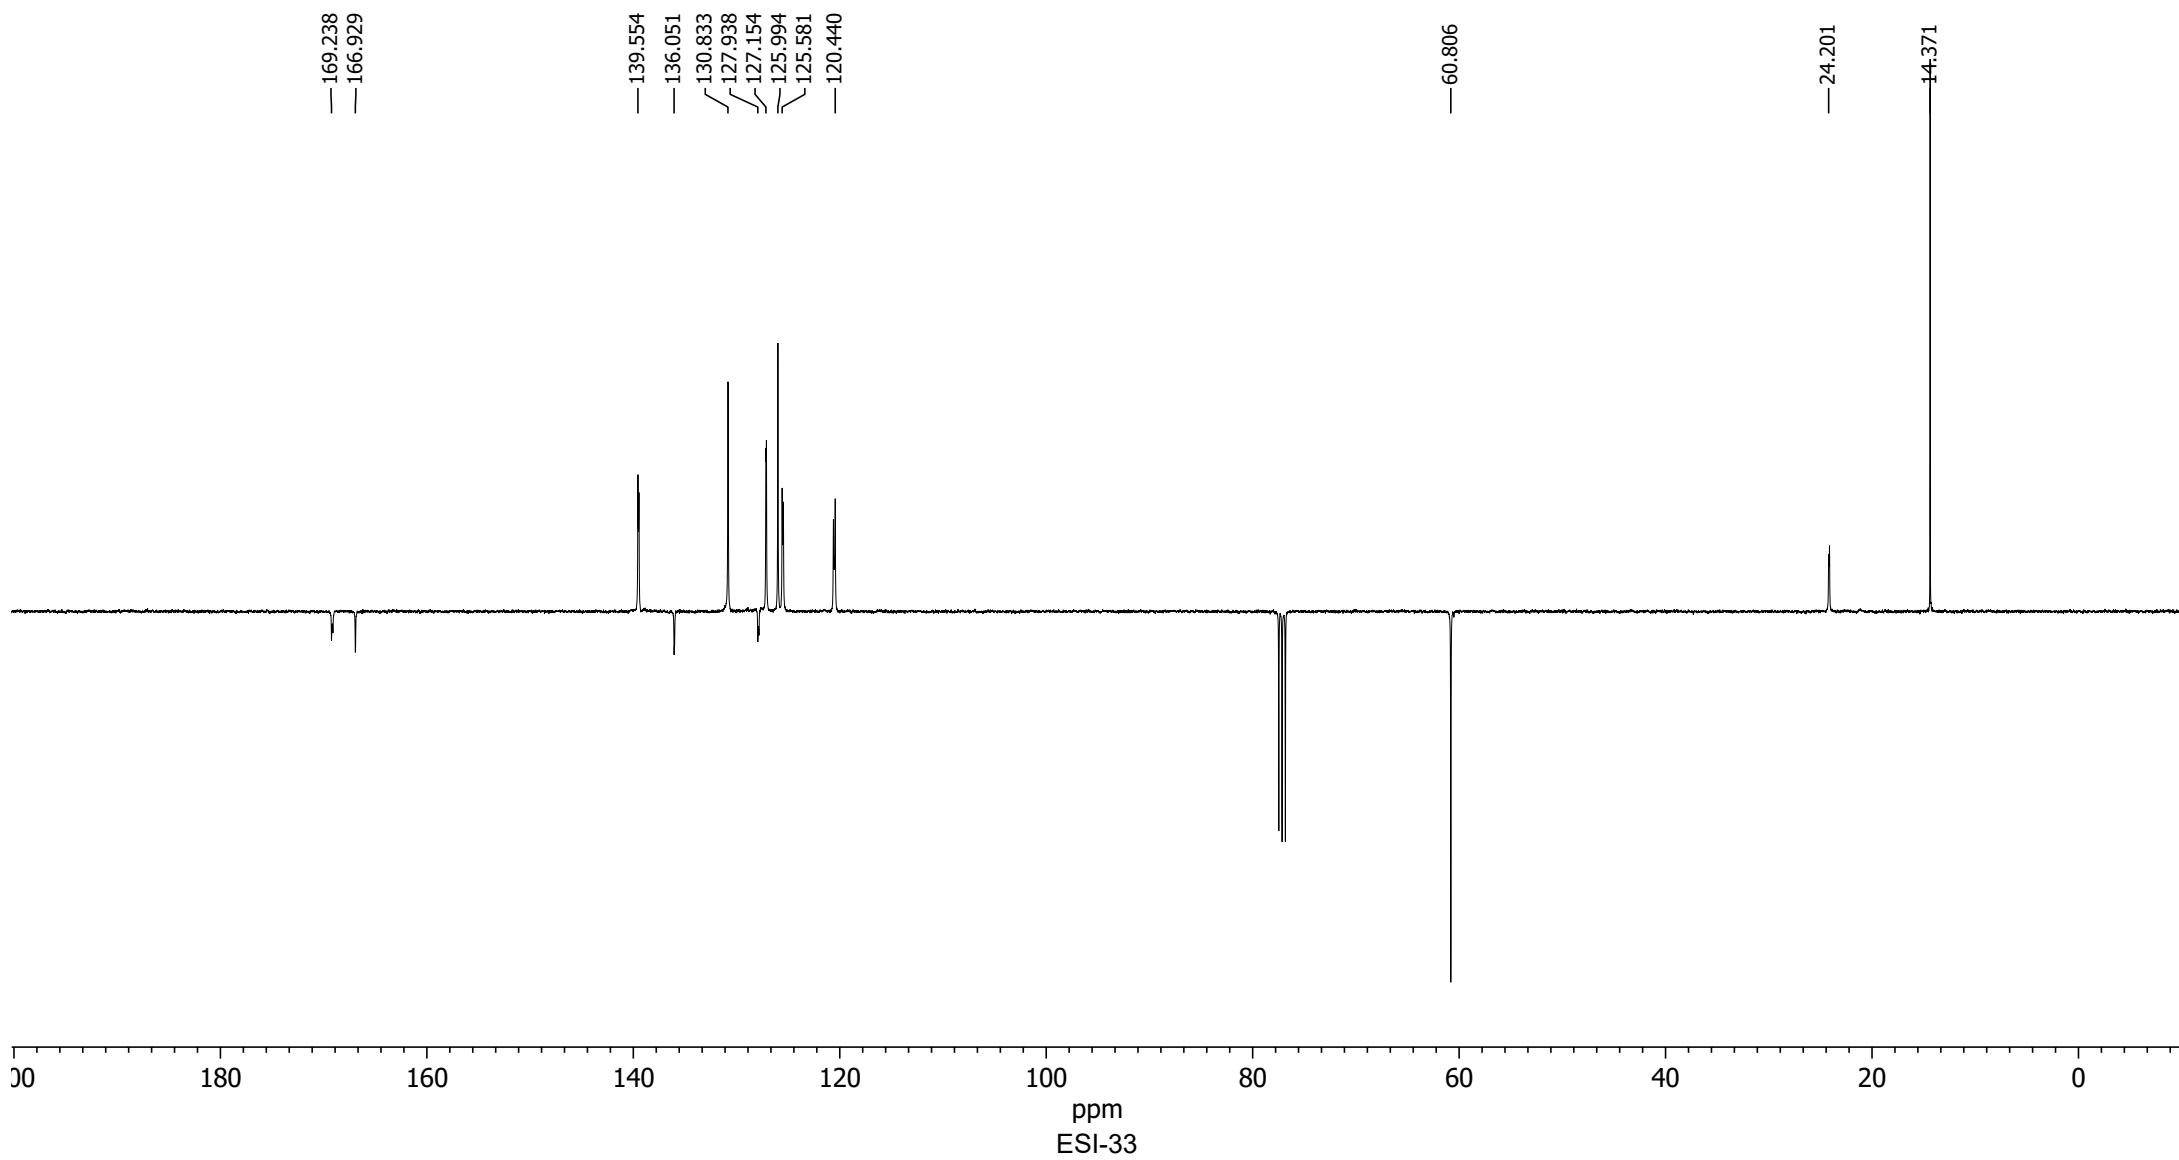

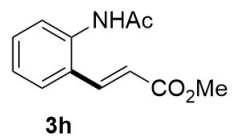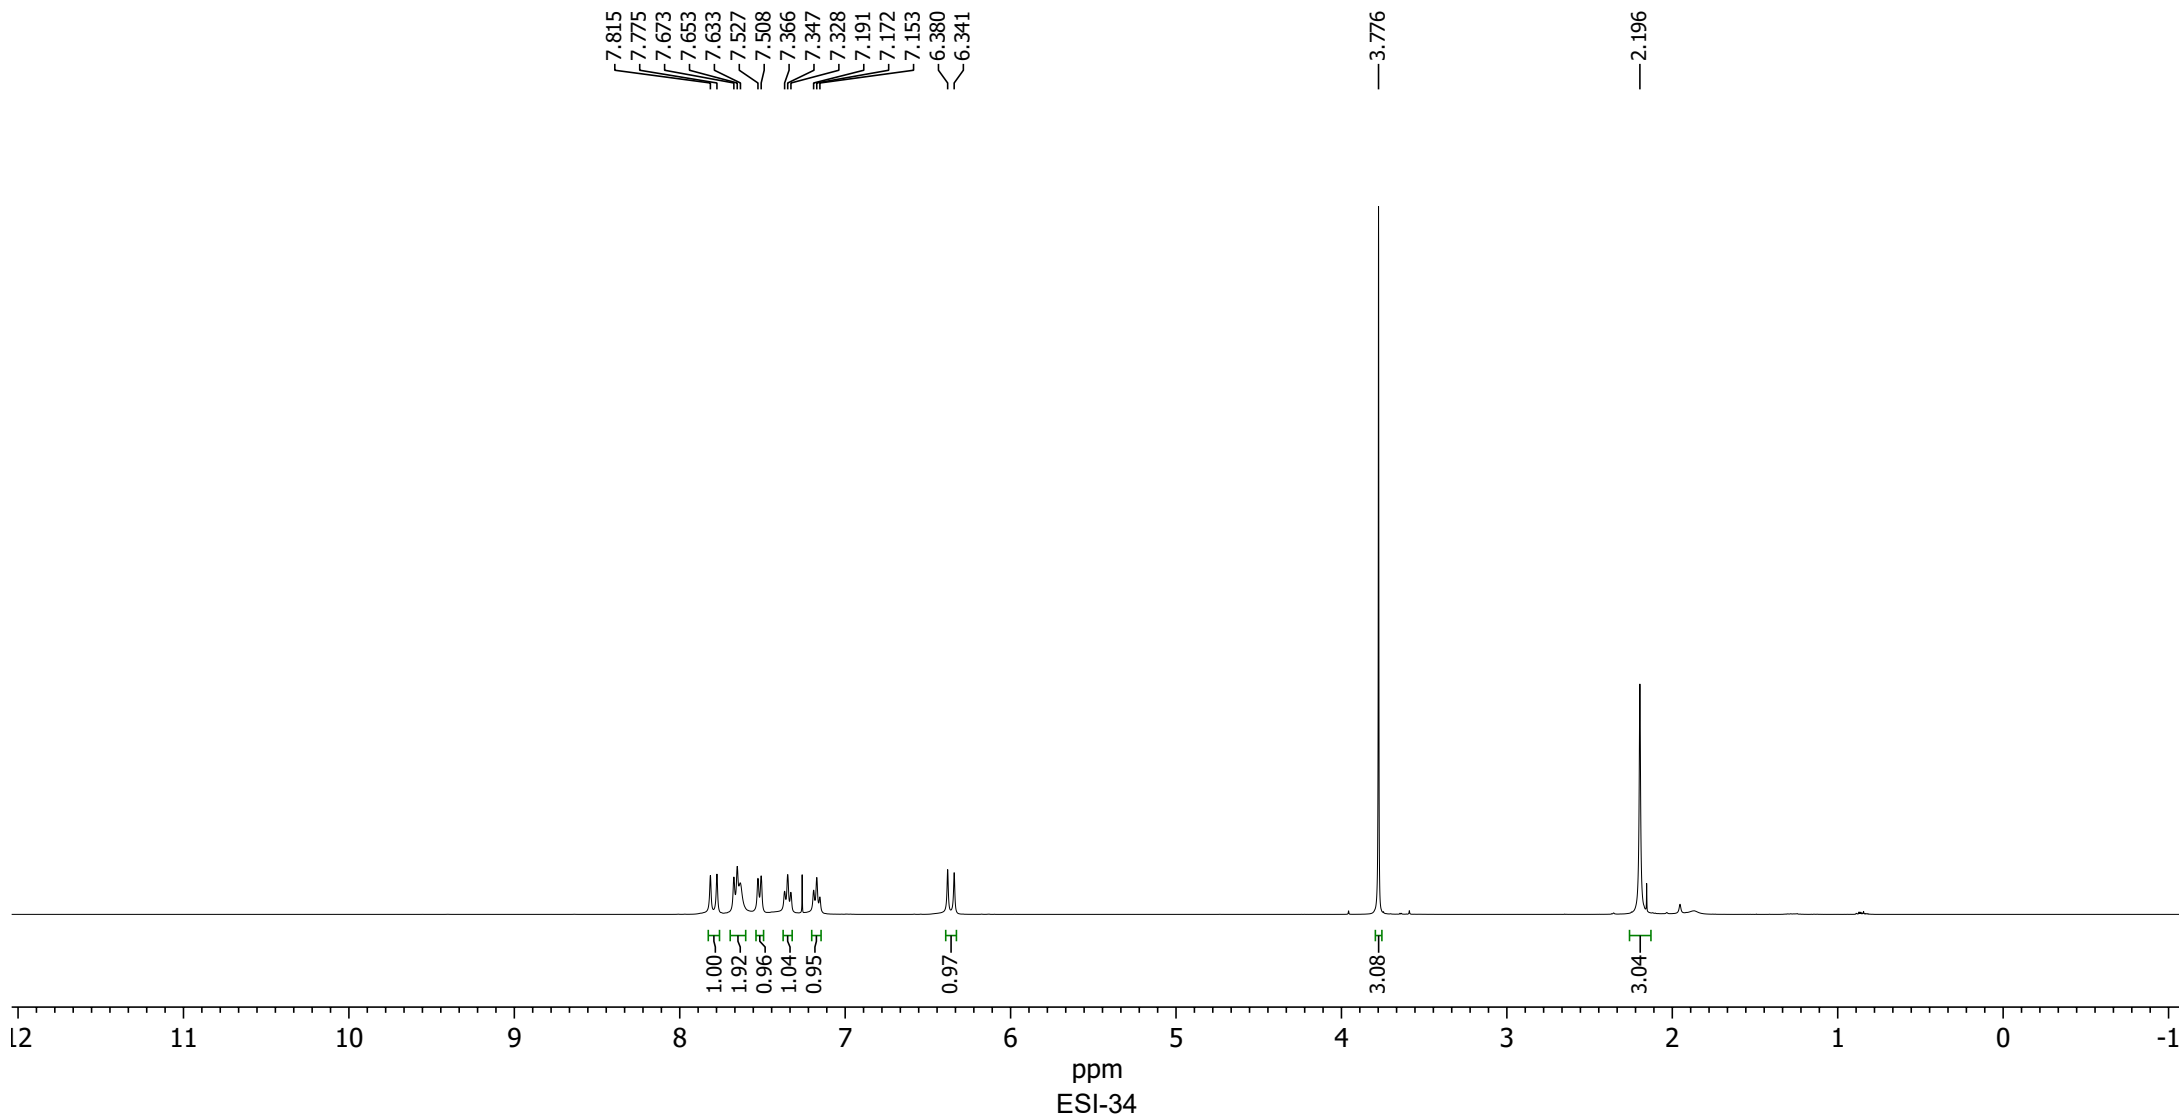

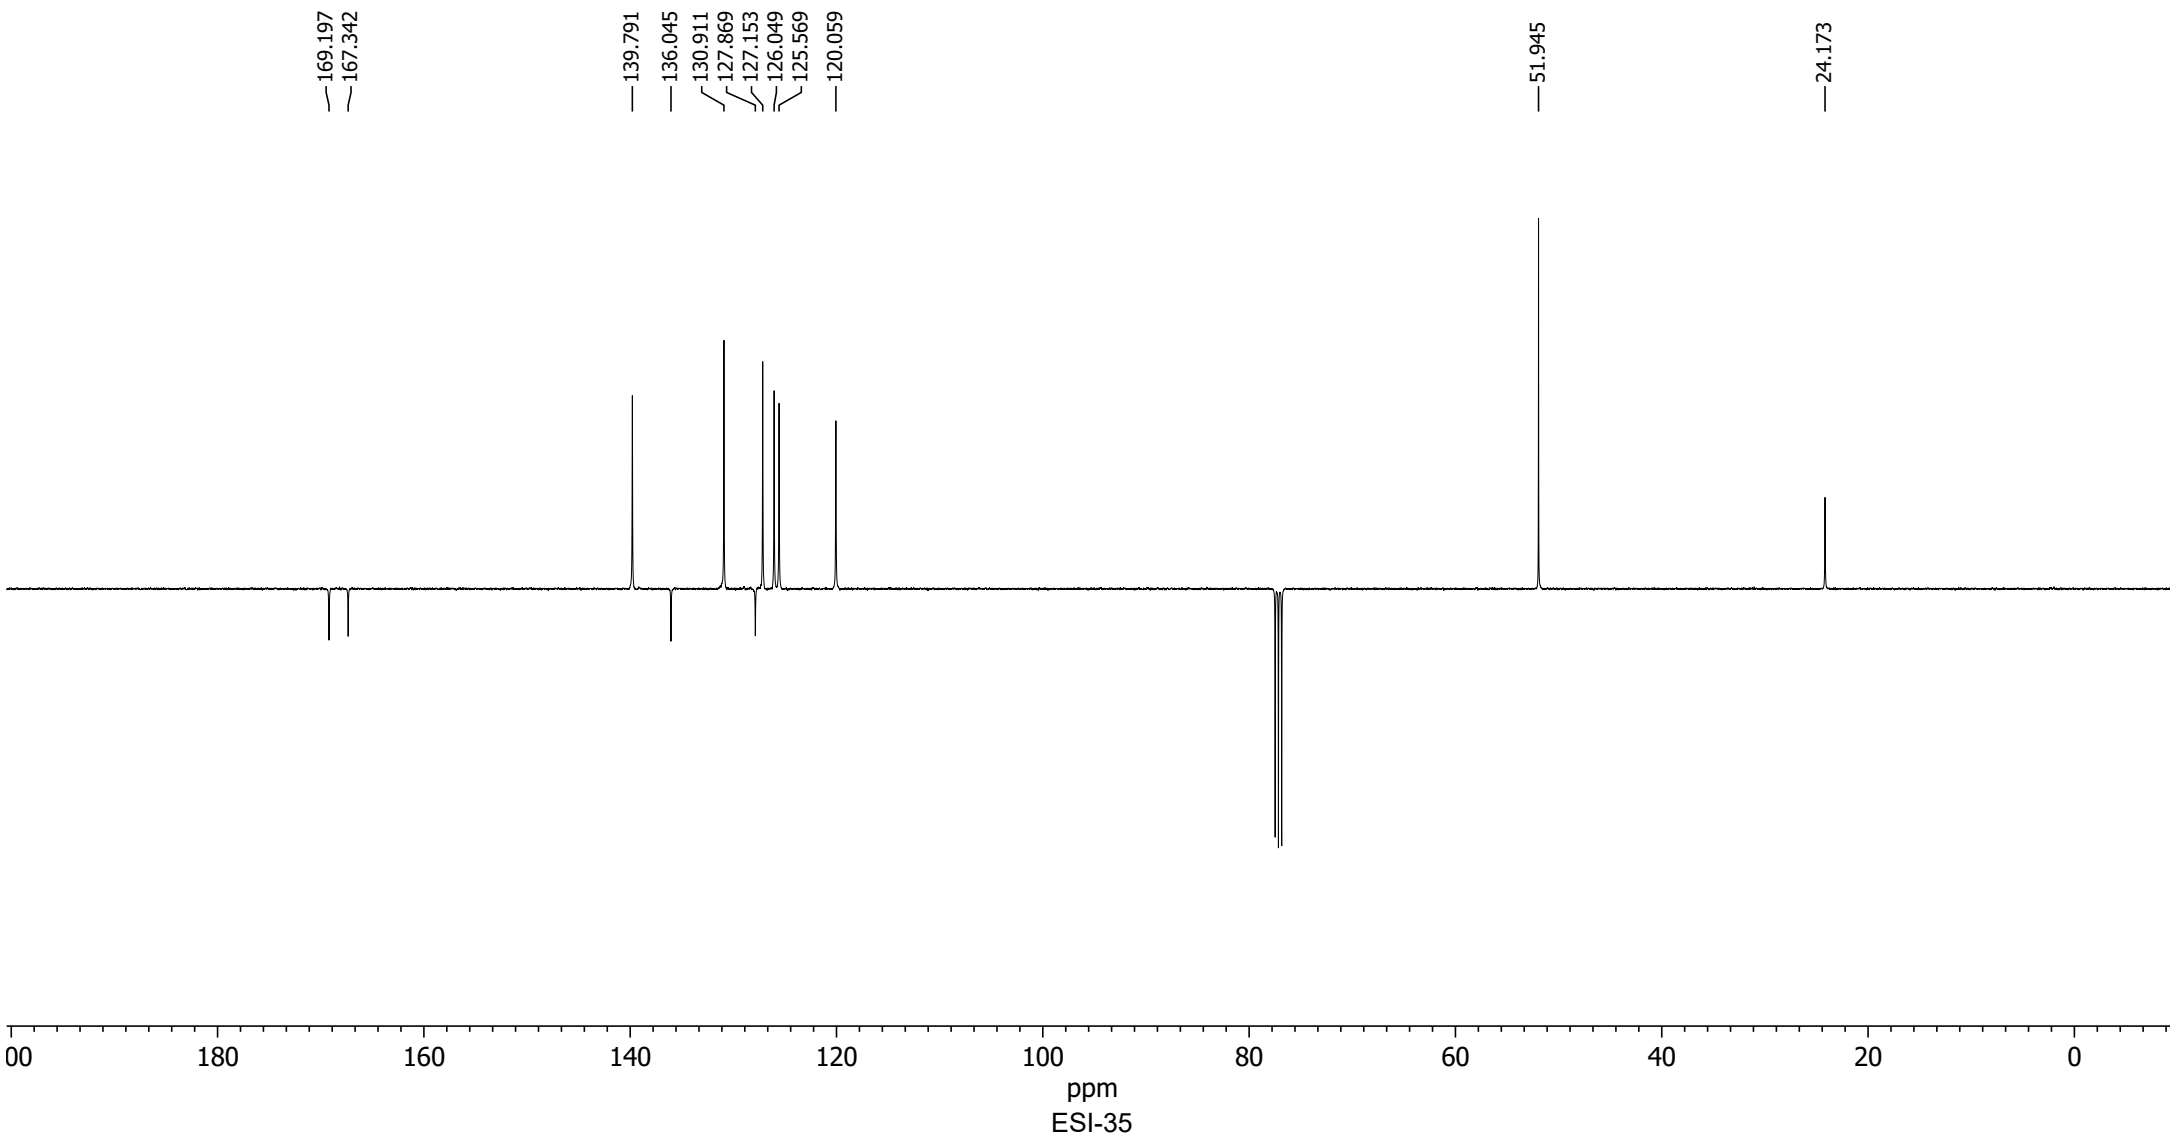

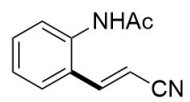

**3i**

7.615  
7.607  
7.587  
7.574  
7.484  
7.465  
7.437  
7.418  
7.399  
7.247  
7.228  
7.209

5.839  
5.798

2.218

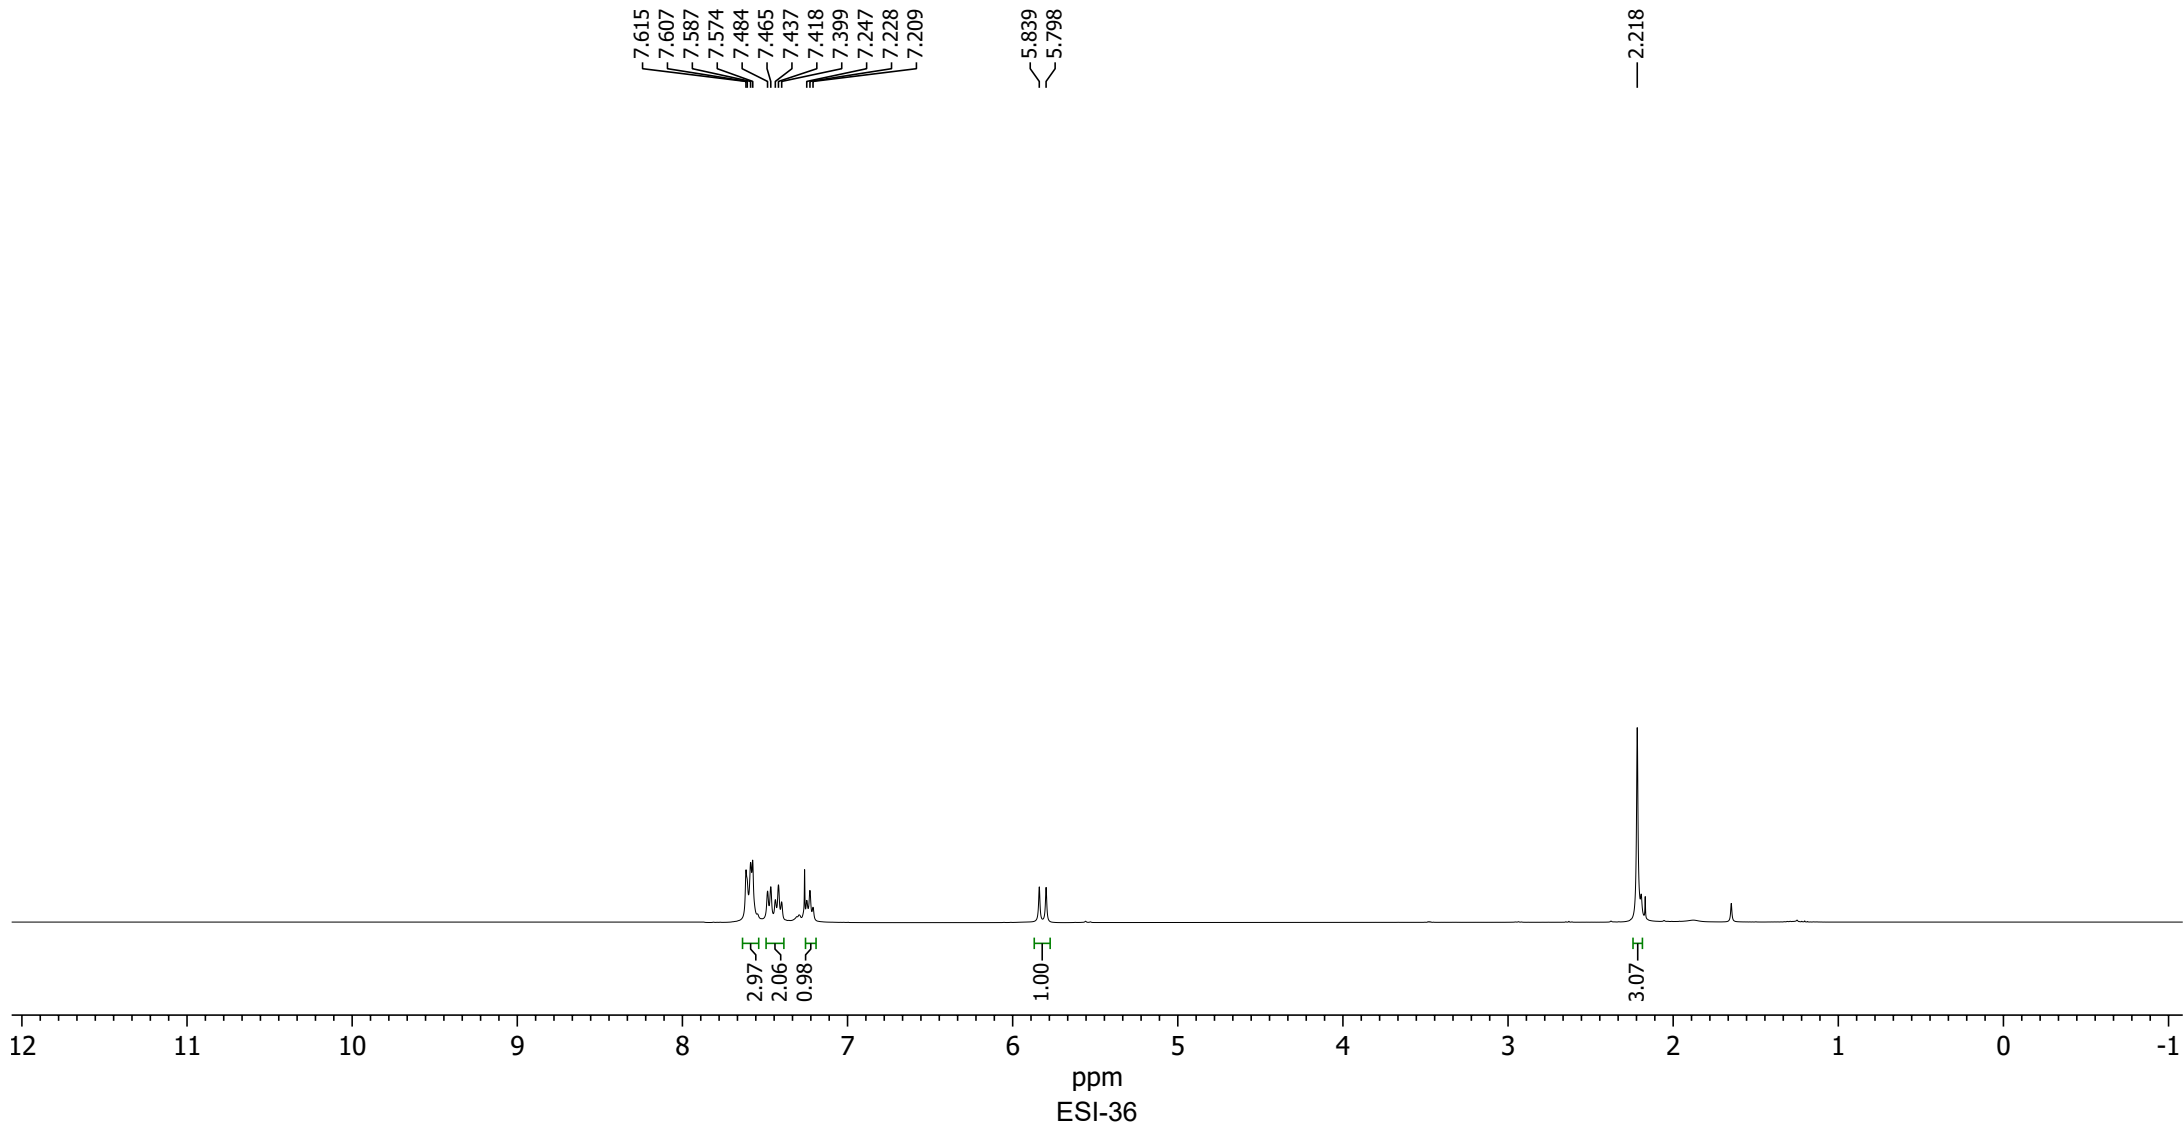

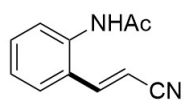

**3i**

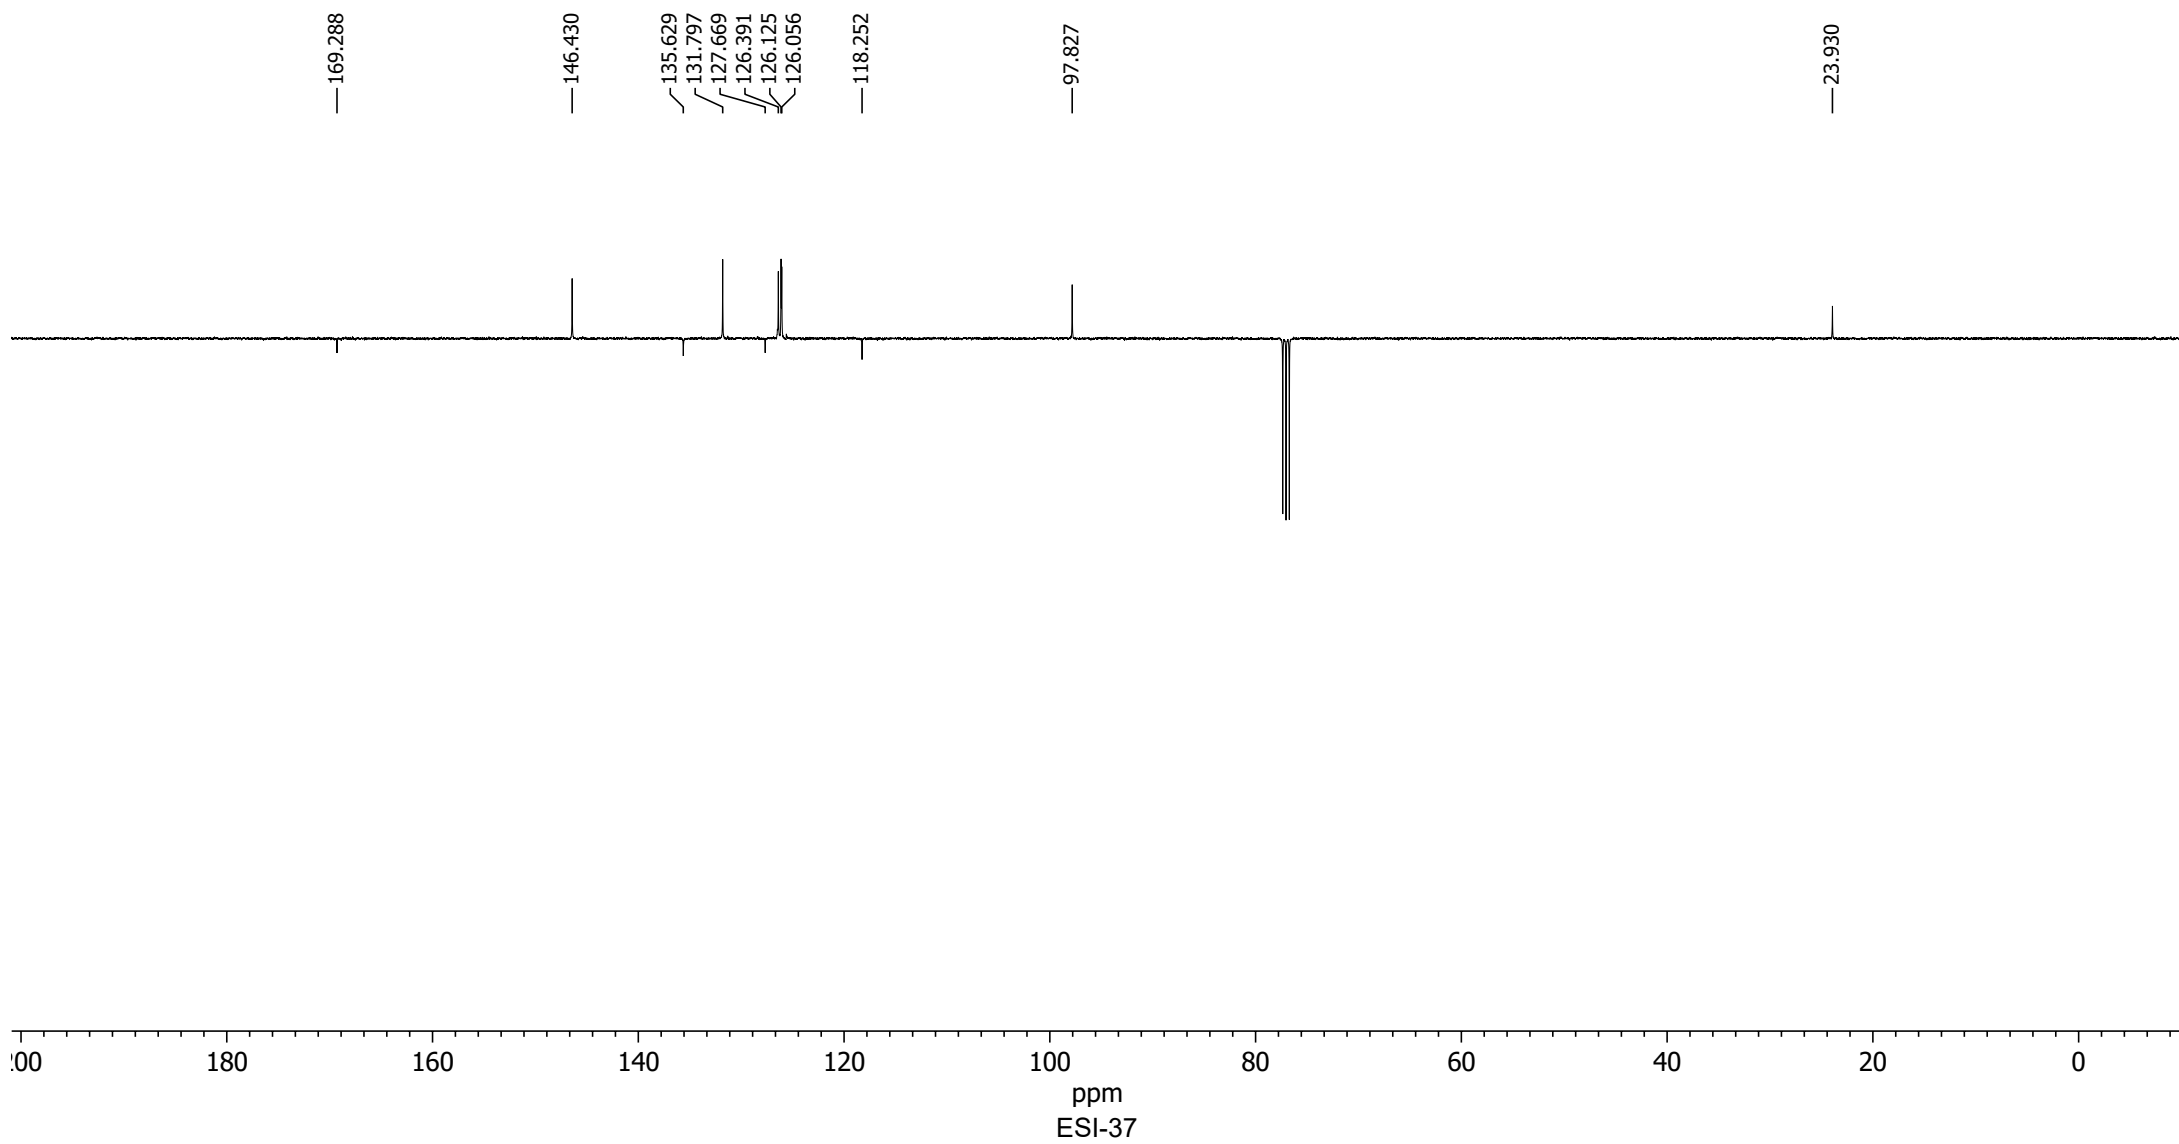

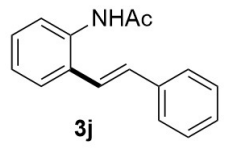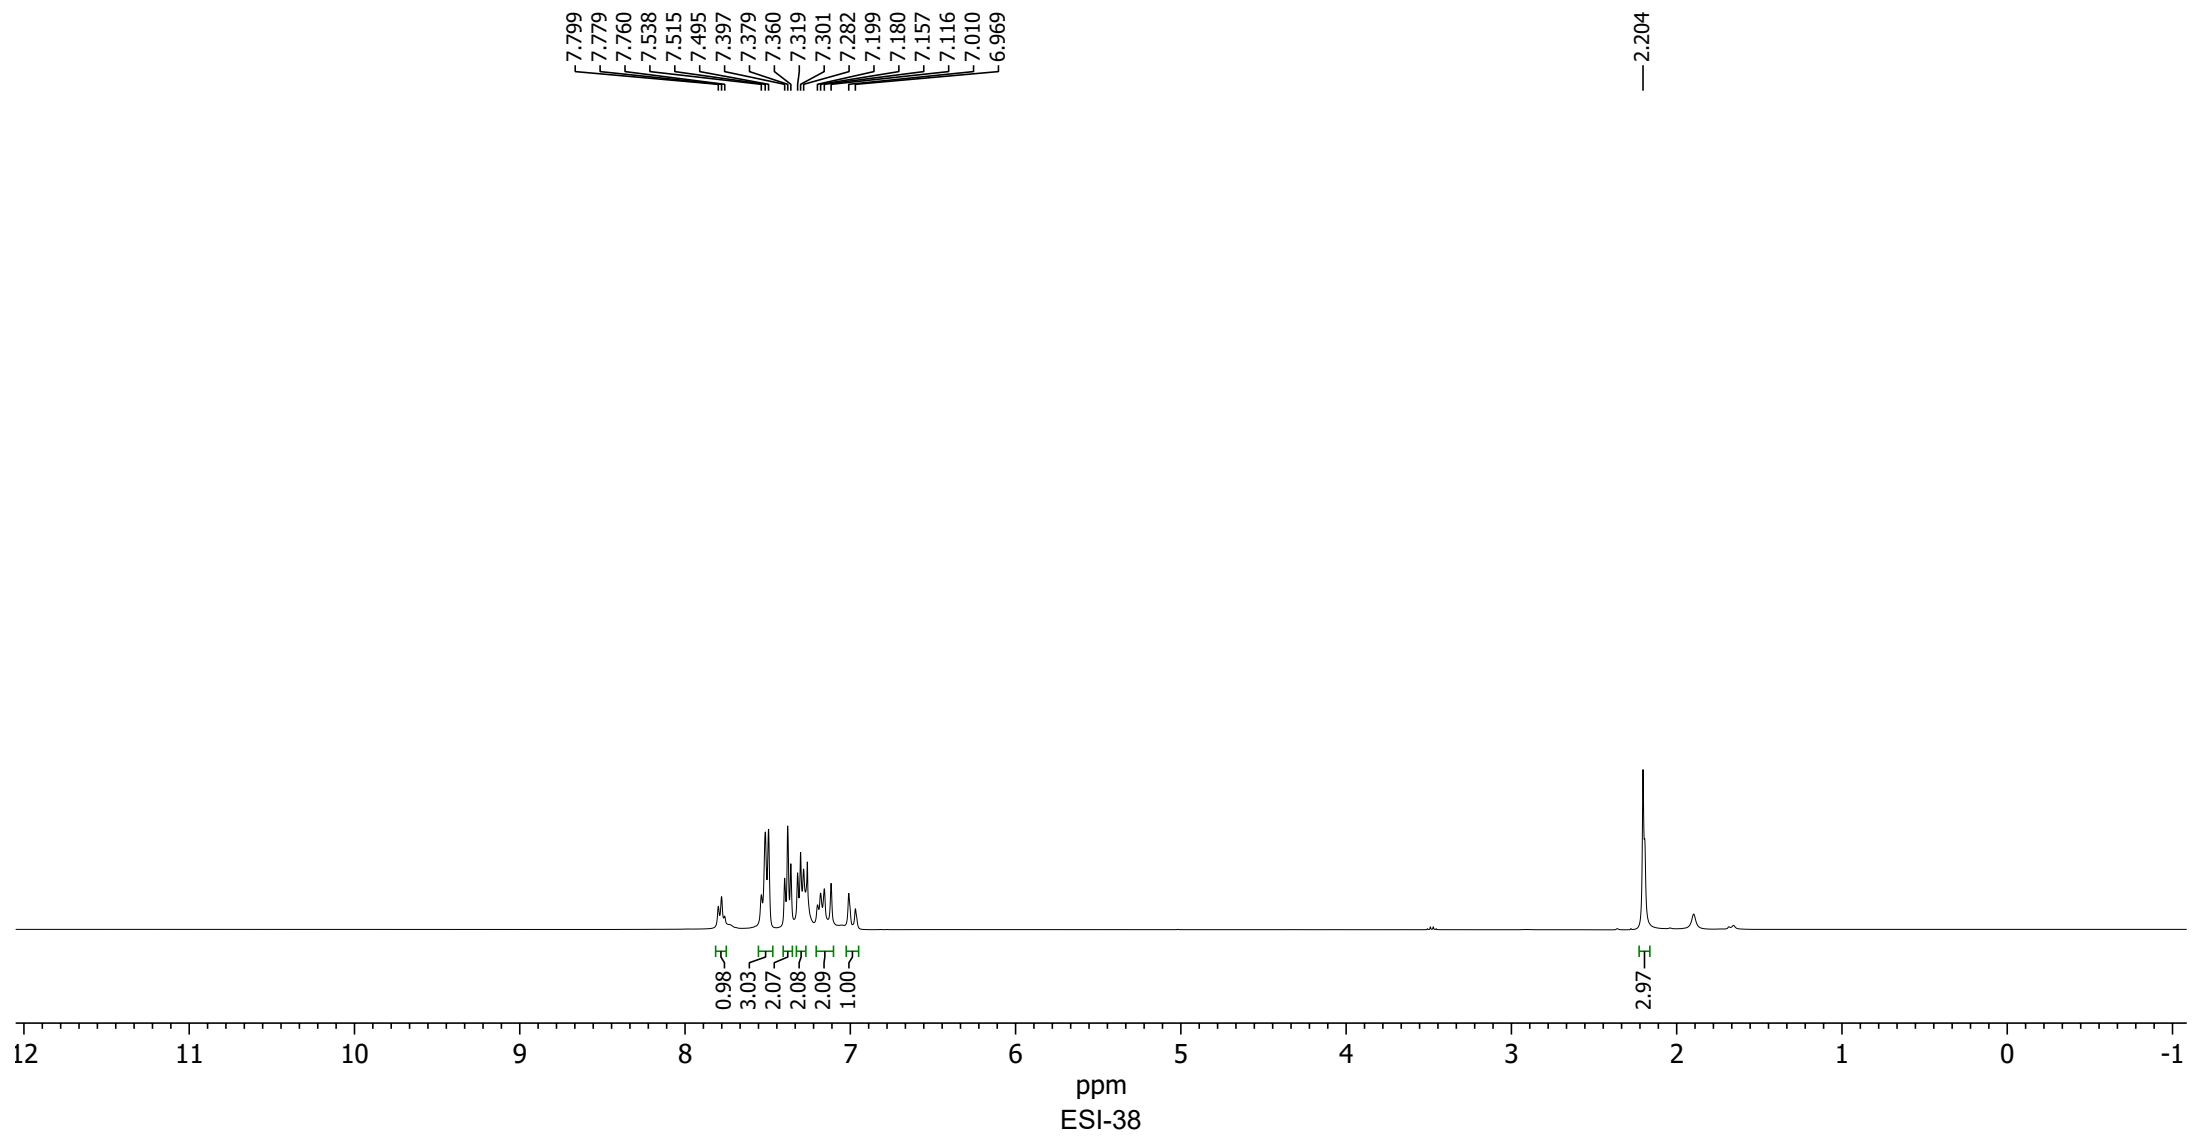

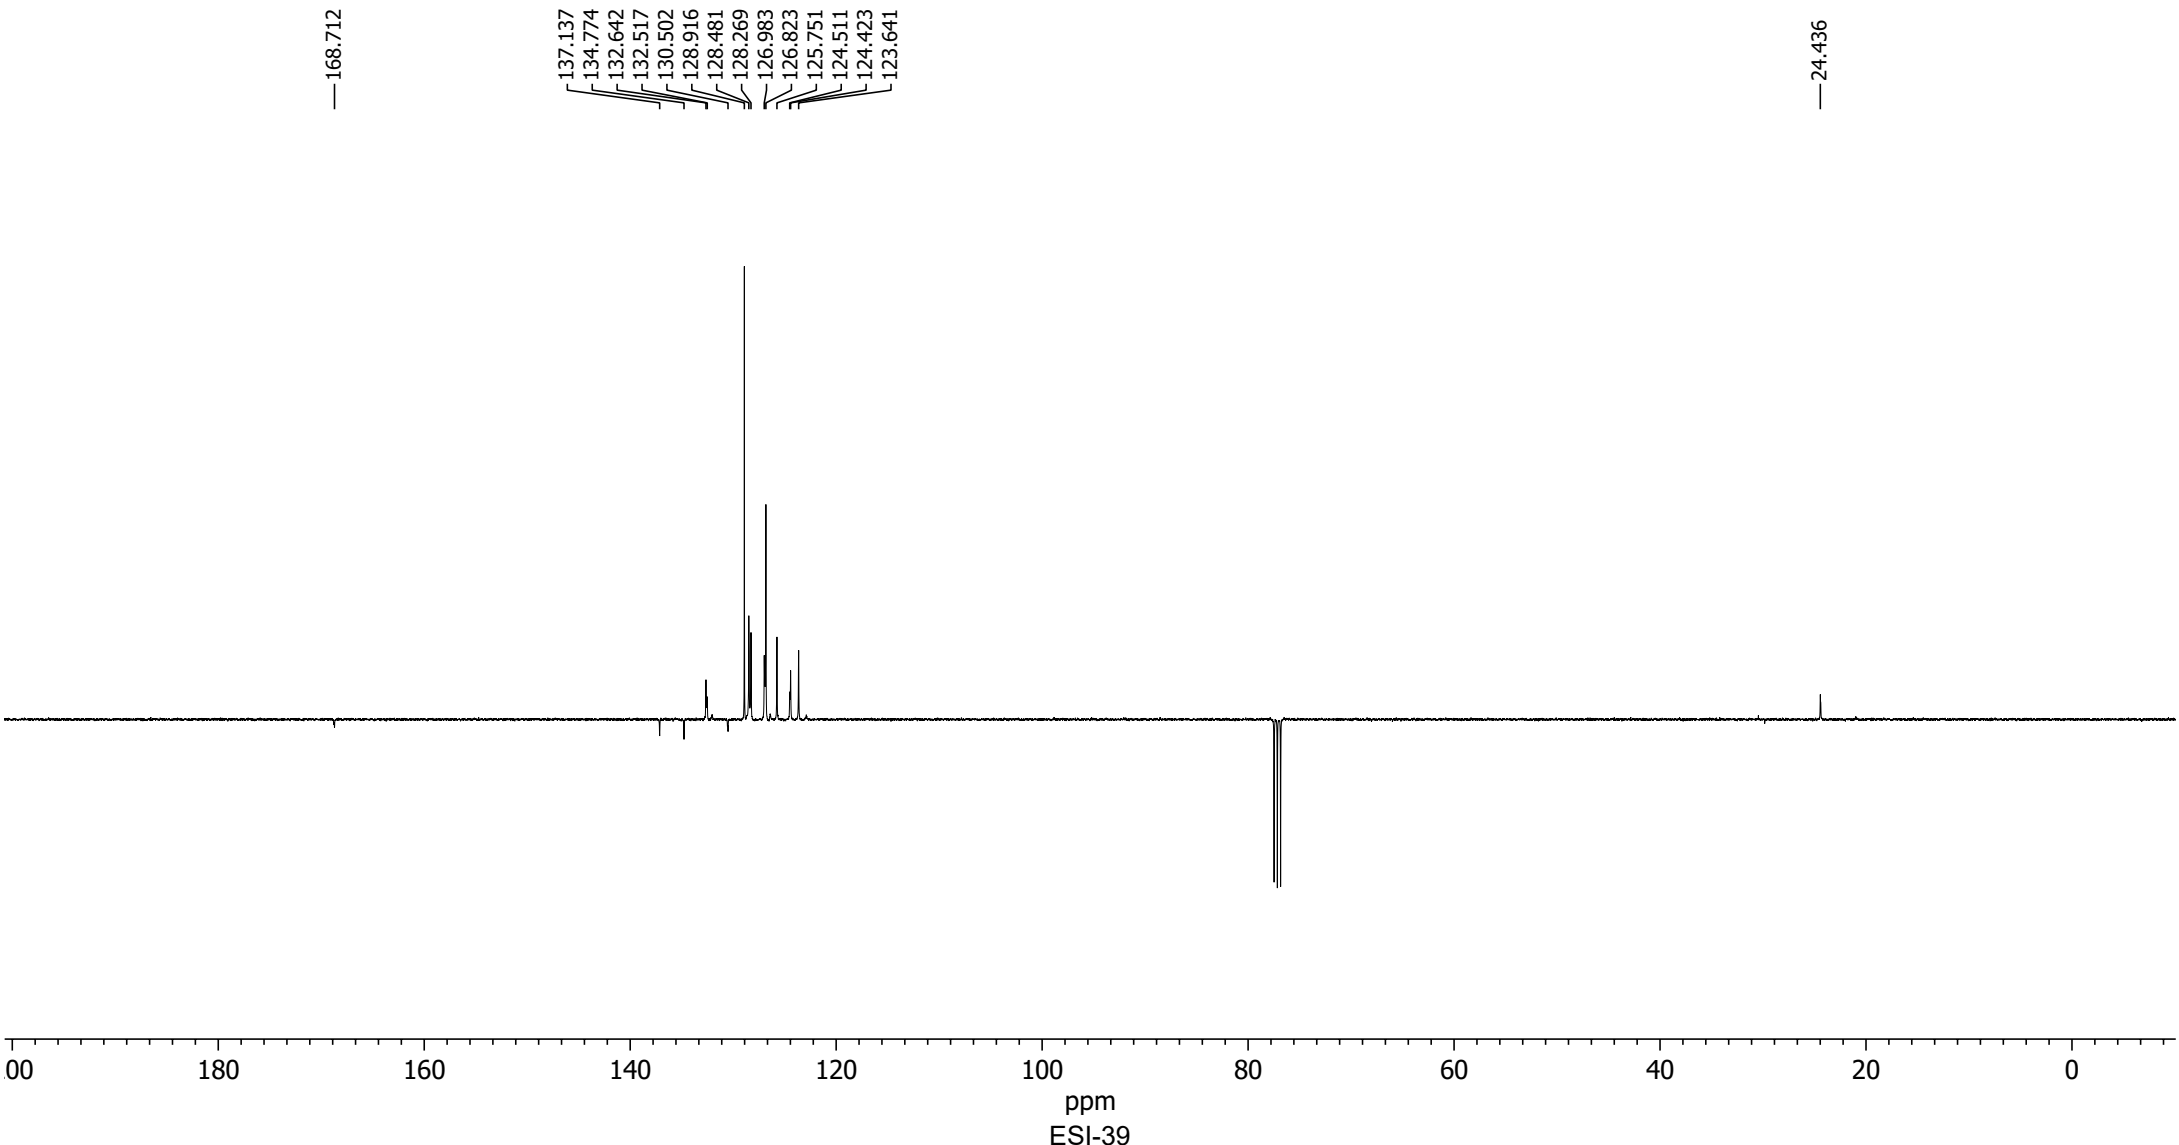

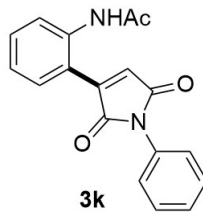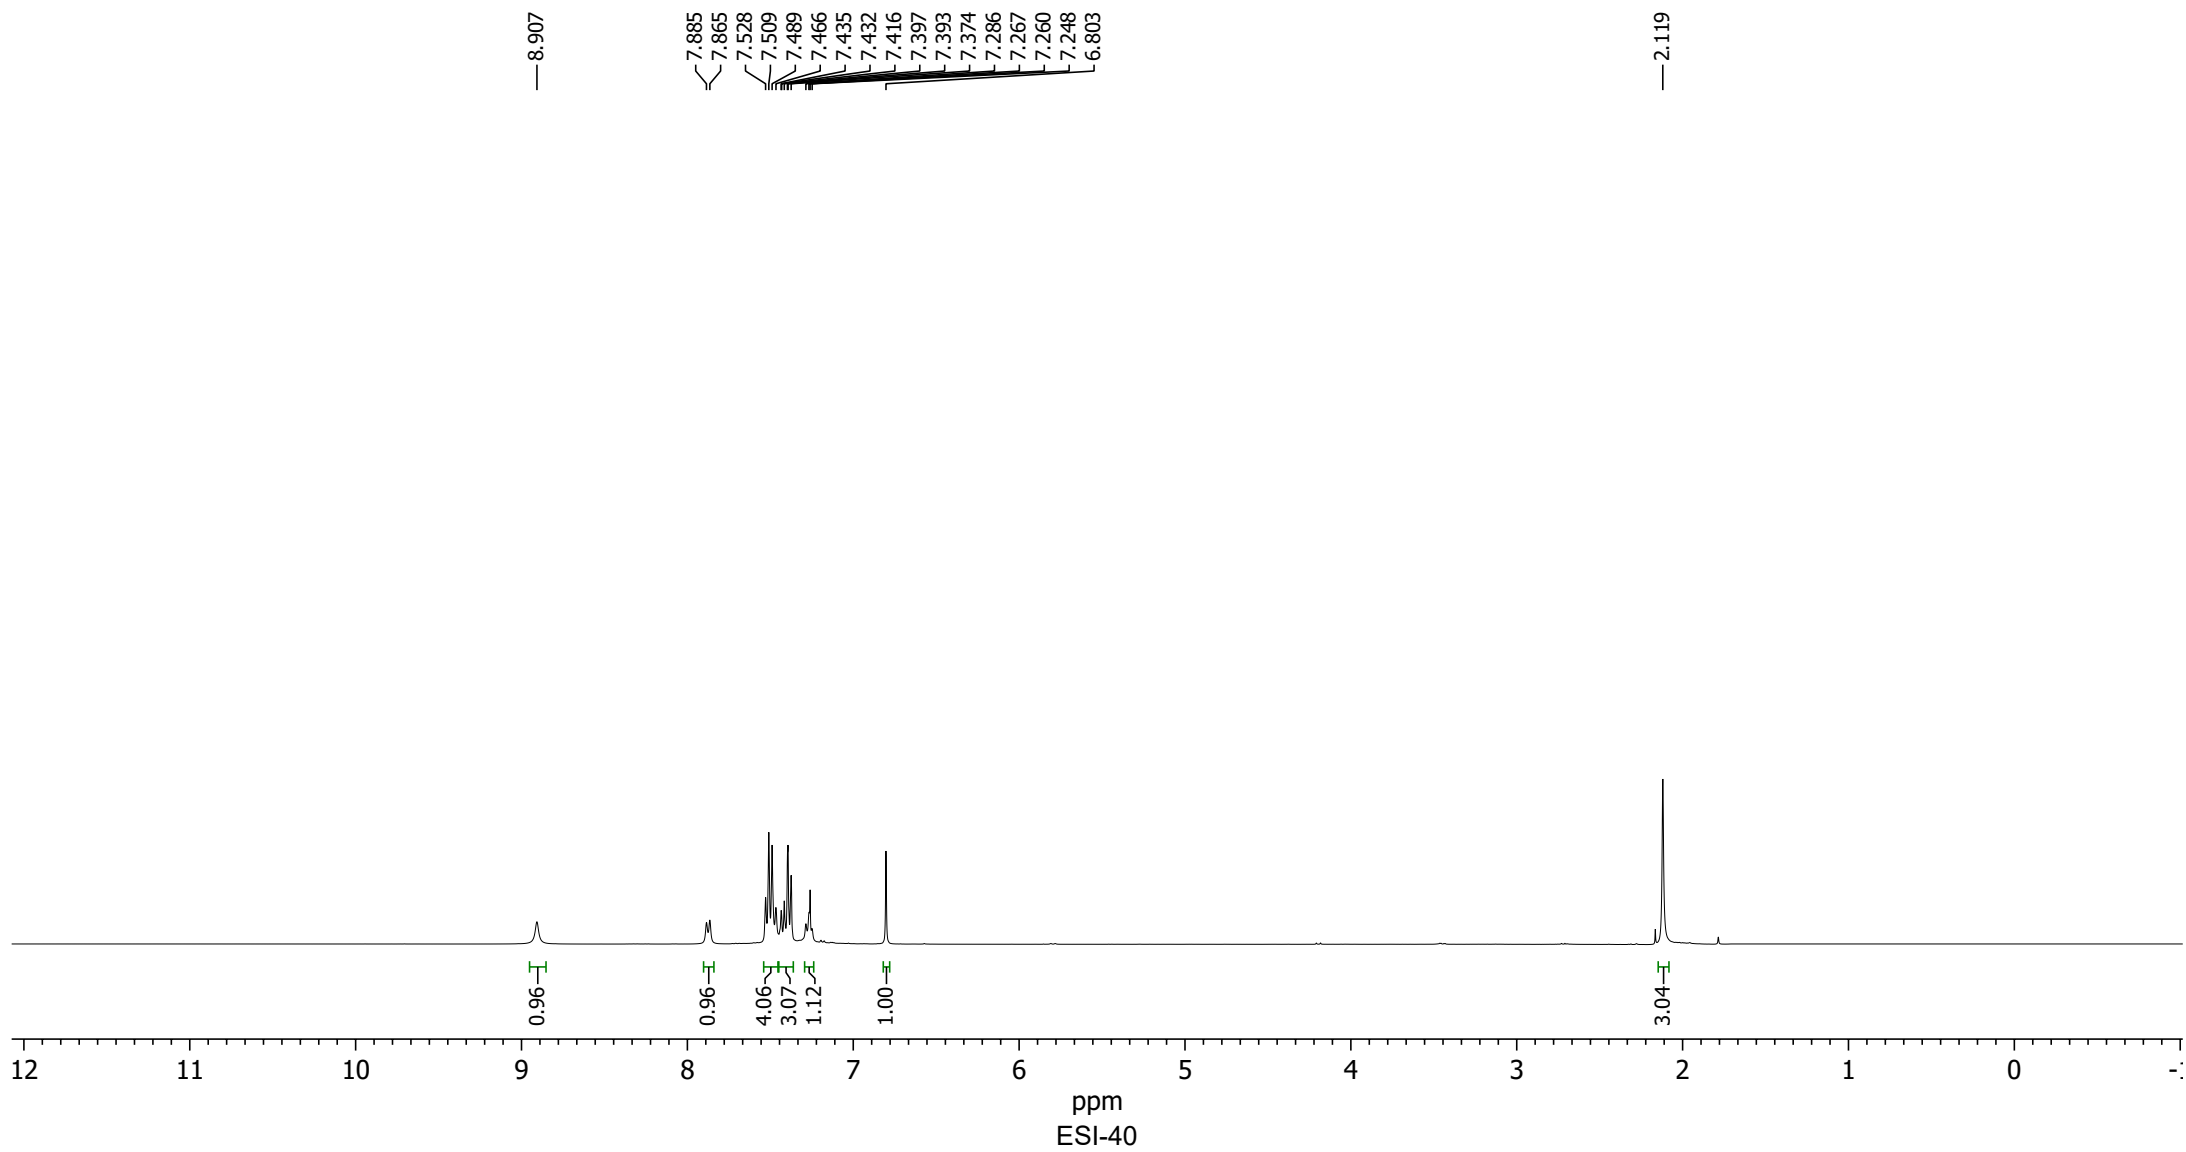



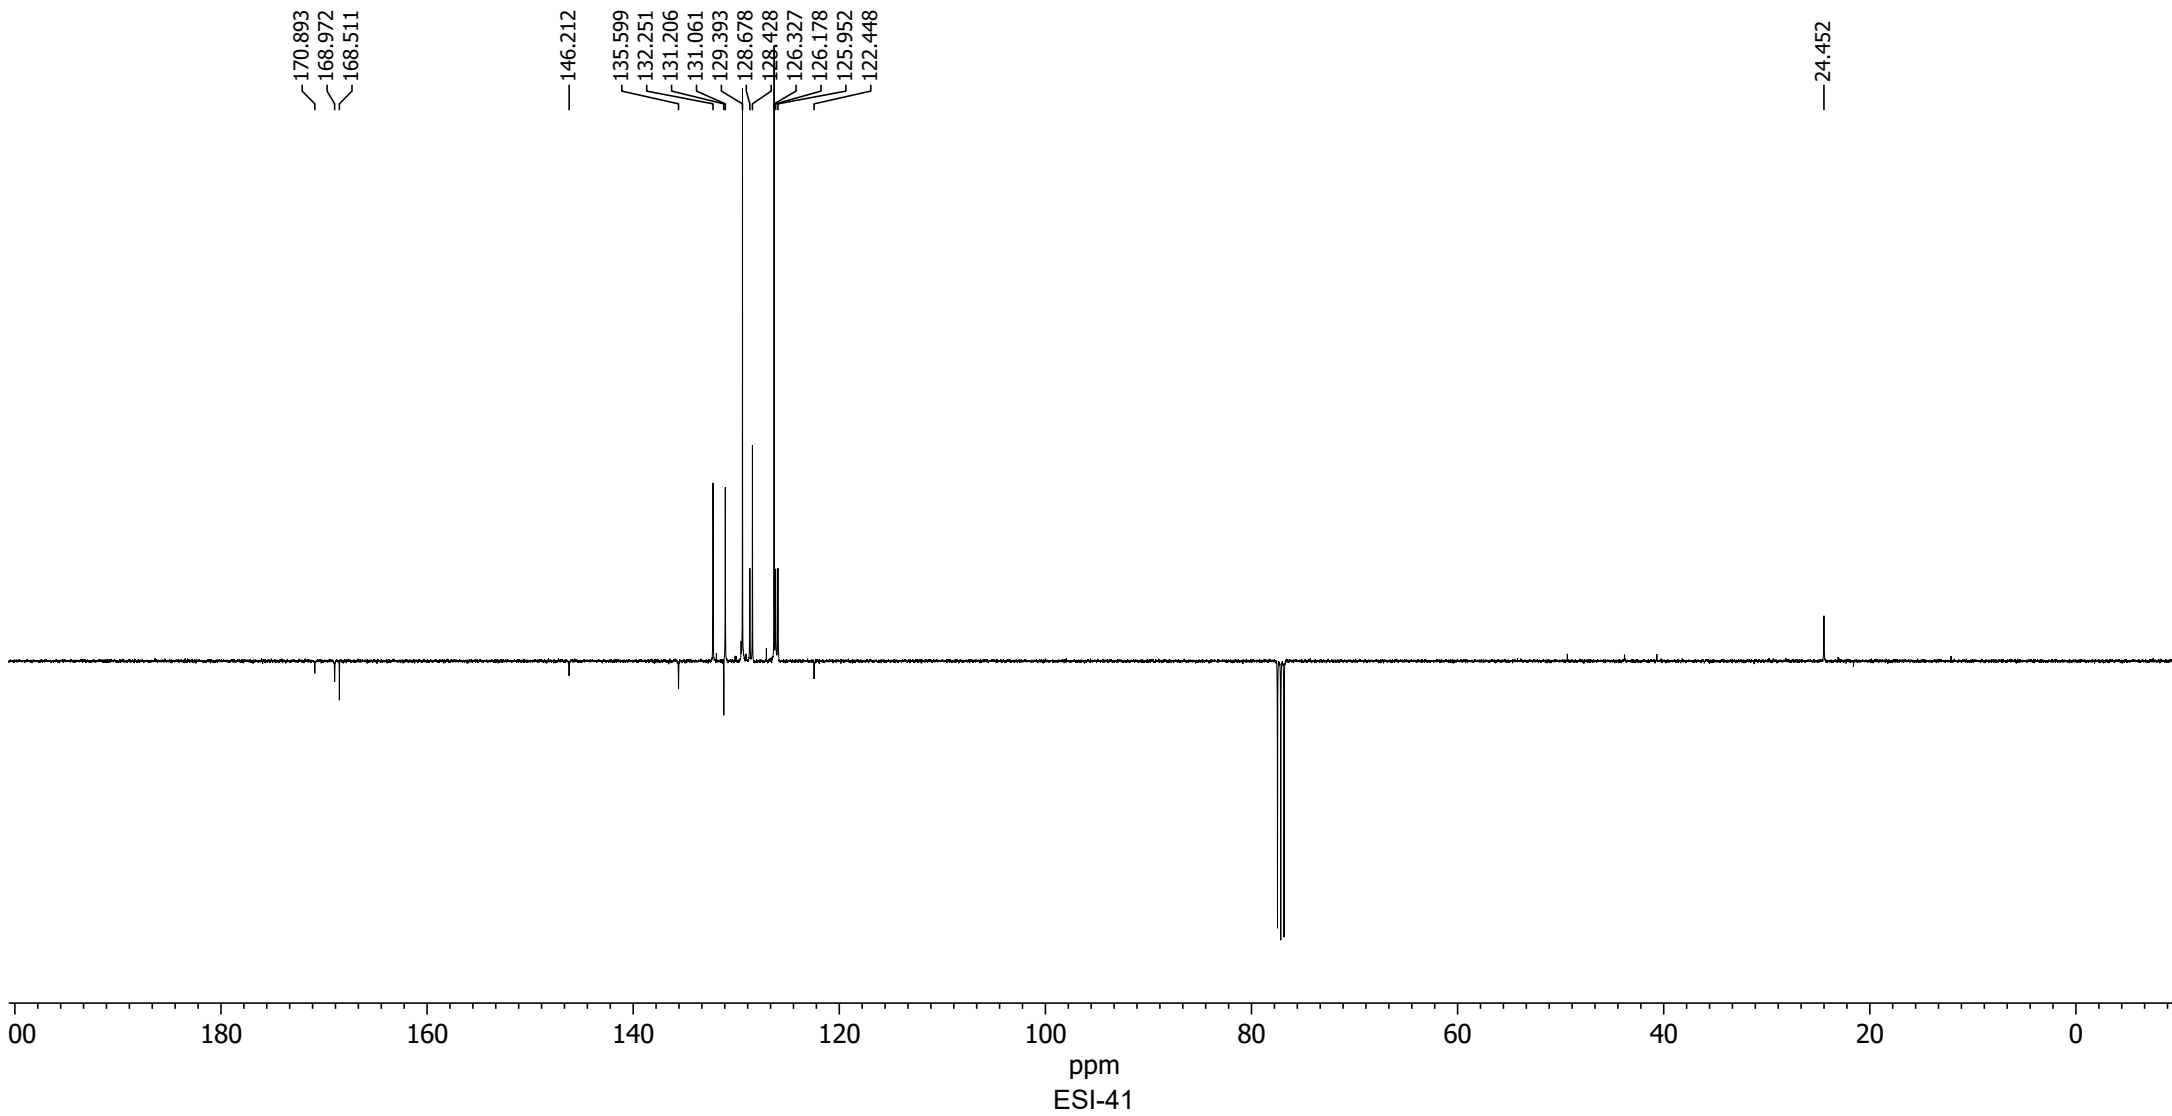

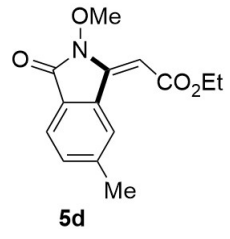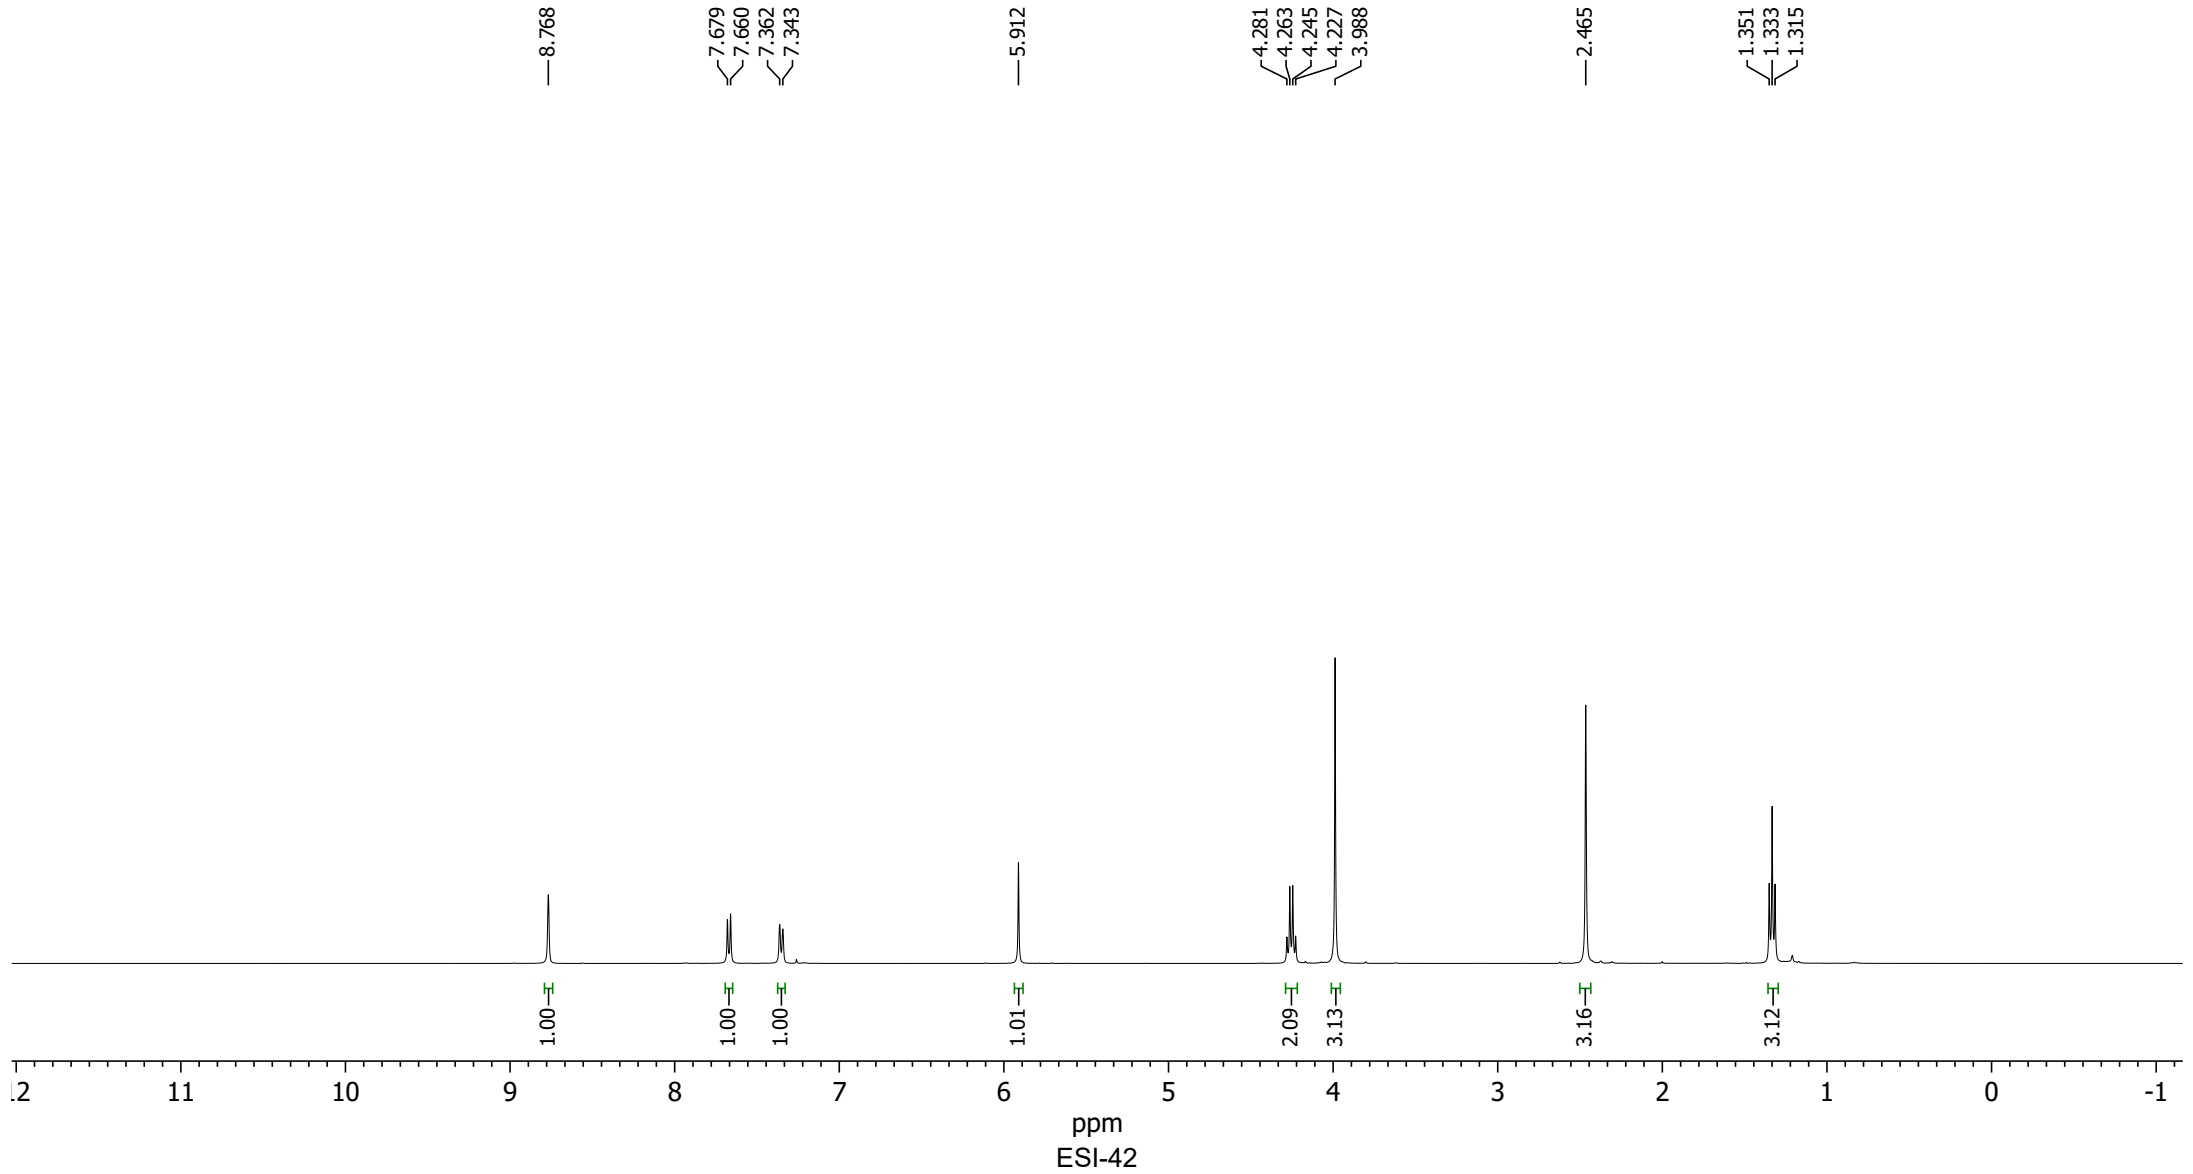

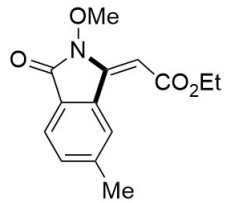

5d

— 165.955

— 161.827

— 144.597

— 144.043

— 132.255

— 130.431

— 128.680

— 124.790

— 123.189

— 97.412

— 64.330

— 60.638

— 22.404

— 14.375

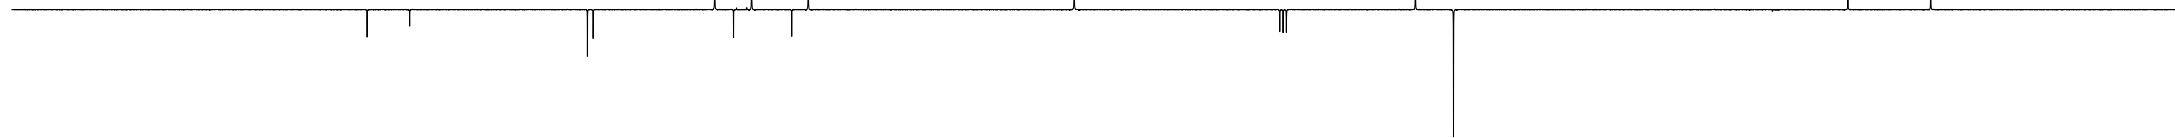

00 180 160 140 120 100 80 60 40 20 0

ppm  
ESI-43

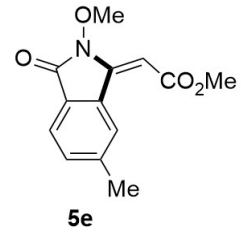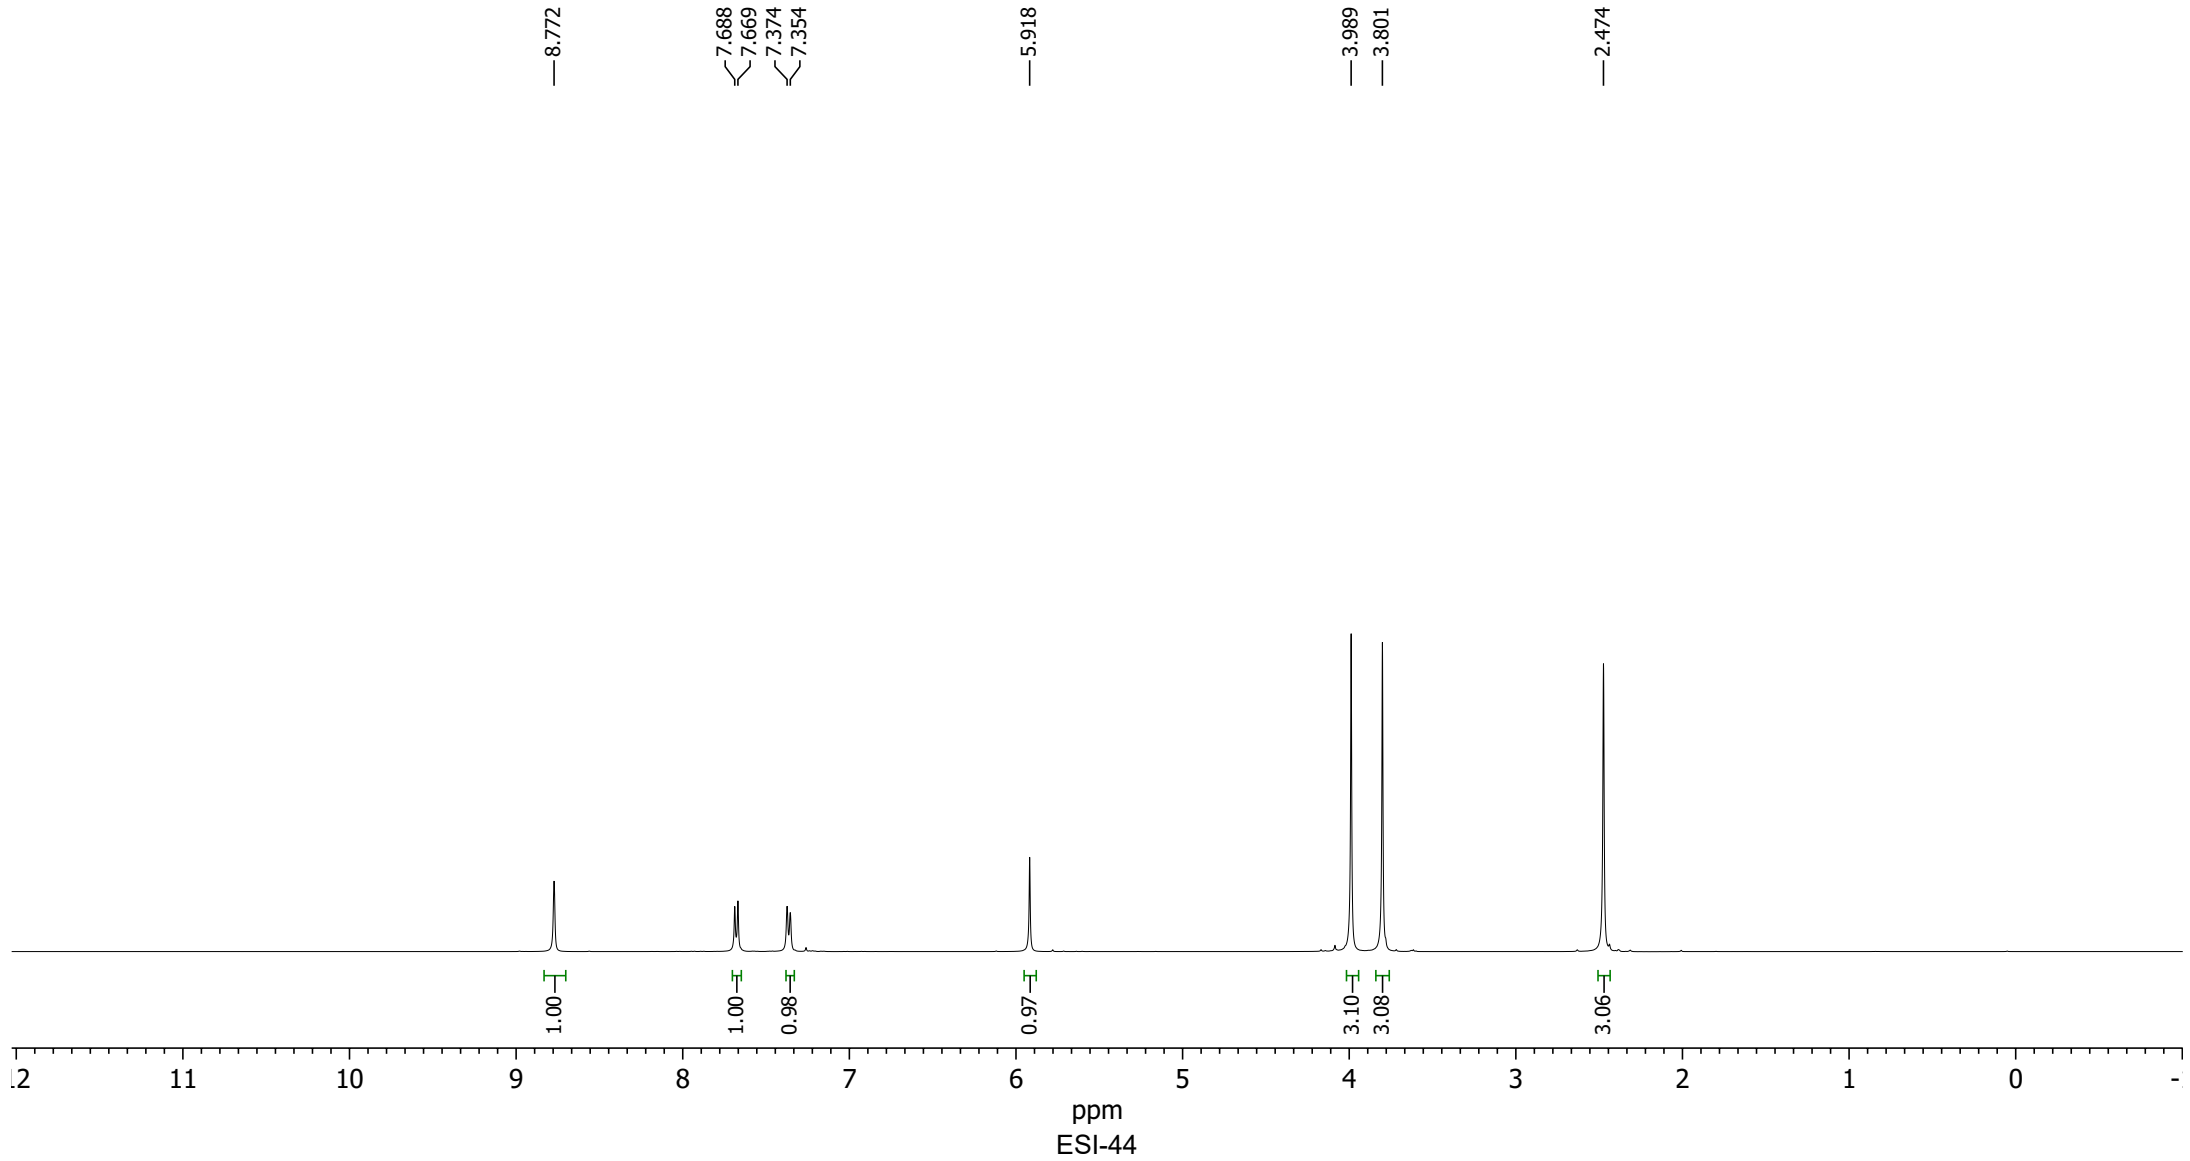

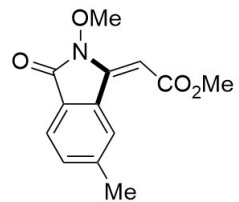

5e

— 166.404

— 161.843

— 144.680

— 144.302

— 132.340

— 130.398

— 128.674

— 124.778

— 123.239

— 96.829

— 64.335

— 51.785

— 22.429

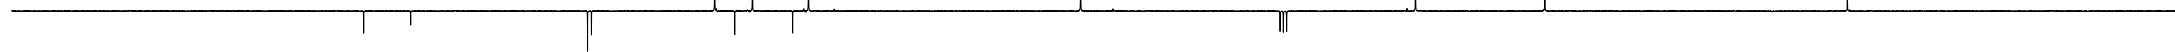

00 180 160 140 120 100 80 60 40 20 0

ppm  
ESI-45
